# Supplementary material for: Synthesis of New Triazolopyrazine Antimalarial Compounds
Source: MDPI journal article supplement (doi:10.3390/molecules26092421), 2021-04-21

## Synthesis of New Triazolopyrazine Antimalarial Compounds

Daniel J. G. Johnson <sup>1</sup>, Ian D. Jenkins <sup>1</sup>, Cohan Huxley <sup>1</sup>, Mark J. Coster <sup>1</sup>, Kah Yean Lum <sup>1,2</sup>,

Jonathan M. White <sup>3</sup>, Vicky M. Avery <sup>1,4</sup>, and Rohan A. Davis <sup>1,2,\*</sup>

<sup>1</sup>Griffith Institute for Drug Discovery, School of Environment and Science, Griffith University, Brisbane, QLD 4111, Australia; d.johnson@griffithuni.edu.au (D. J. G. J.); i.jenkins@griffith.edu.au (I.D.J.); c.huxley@griffithuni.edu.au (C.H.); m.coster@griffith.edu.au (M.J.C.); k.lum@griffith.edu.au (K.Y.L.); v.avery@griffith.edu.au (V.M.A.)

<sup>2</sup>NatureBank, Griffith University, Brisbane, QLD 4111, Australia

<sup>3</sup>School of Chemistry and Bio21 Institute, The University of Melbourne, Melbourne, VIC 3010, Australia; whitejm@unimelb.edu.au (J.M.W.)

<sup>4</sup>Discovery Biology, Griffith University, Brisbane, QLD 4111, Australia

\*Correspondence: r.davis@griffith.edu.au; Tel: +61-7-3735-6043

## Contents

|                                                                                       |
|---------------------------------------------------------------------------------------|
| S1: NMR data of compound <b>2</b> in DMSO- <i>d</i> <sub>6</sub>                      |
| S2: <sup>1</sup> H NMR spectrum of compound <b>2</b> in DMSO- <i>d</i> <sub>6</sub>   |
| S3: <sup>13</sup> C NMR spectrum of compound <b>2</b> in DMSO- <i>d</i> <sub>6</sub>  |
| S4: COSY spectrum of compound <b>2</b> in DMSO- <i>d</i> <sub>6</sub>                 |
| S5: HSQC spectrum of compound <b>2</b> in DMSO- <i>d</i> <sub>6</sub>                 |
| S6: HMBC spectrum of compound <b>2</b> in DMSO- <i>d</i> <sub>6</sub>                 |
| S7: ROESY spectrum of compound <b>2</b> in DMSO- <i>d</i> <sub>6</sub>                |
| S8: HRMS of compound <b>2</b>                                                         |
| S9: NMR data of compound <b>3</b> in DMSO- <i>d</i> <sub>6</sub>                      |
| S10: <sup>1</sup> H NMR spectrum of compound <b>3</b> in DMSO- <i>d</i> <sub>6</sub>  |
| S11: <sup>13</sup> C NMR spectrum of compound <b>3</b> in DMSO- <i>d</i> <sub>6</sub> |
| S12: COSY spectrum of compound <b>3</b> in DMSO- <i>d</i> <sub>6</sub>                |
| S13: HSQC spectrum of compound <b>3</b> in DMSO- <i>d</i> <sub>6</sub>                |
| S14: HMBC spectrum of compound <b>3</b> in DMSO- <i>d</i> <sub>6</sub>                |
| S15: ROESY spectrum of compound <b>3</b> in DMSO- <i>d</i> <sub>6</sub>               |
| S16: HRMS of compound <b>3</b>                                                        |
| S17: NMR data of compound <b>4</b> in DMSO- <i>d</i> <sub>6</sub>                     |
| S18: <sup>1</sup> H NMR spectrum of compound <b>4</b> in DMSO- <i>d</i> <sub>6</sub>  |
| S19: <sup>13</sup> C NMR spectrum of compound <b>4</b> in DMSO- <i>d</i> <sub>6</sub> |
| S20: COSY spectrum of compound <b>4</b> in DMSO- <i>d</i> <sub>6</sub>                |
| S21: HSQC spectrum of compound <b>4</b> in DMSO- <i>d</i> <sub>6</sub>                |
| S22: HMBC spectrum of compound <b>4</b> in DMSO- <i>d</i> <sub>6</sub>                |
| S23: HRMS of compound <b>4</b>                                                        |
| S24: NMR data of compound <b>5</b> in DMSO- <i>d</i> <sub>6</sub>                     |
| S25: <sup>1</sup> H NMR spectrum of compound <b>5</b> in DMSO- <i>d</i> <sub>6</sub>  |
| S26: <sup>13</sup> C NMR spectrum of compound <b>5</b> in DMSO- <i>d</i> <sub>6</sub> |
| S27: COSY spectrum of compound <b>5</b> in DMSO- <i>d</i> <sub>6</sub>                |
| S28: HSQC spectrum of compound <b>5</b> in DMSO- <i>d</i> <sub>6</sub>                |
| S29: HMBC spectrum of compound <b>5</b> in DMSO- <i>d</i> <sub>6</sub>                |
| S30: ROESY spectrum of compound <b>5</b> in DMSO- <i>d</i> <sub>6</sub>               |
| S31: HRMS of compound <b>5</b>                                                        |
| S32: NMR data of compound <b>6</b> in DMSO- <i>d</i> <sub>6</sub>                     |
| S33: <sup>1</sup> H NMR spectrum of compound <b>6</b> in DMSO- <i>d</i> <sub>6</sub>  |
| S34: <sup>13</sup> C NMR spectrum of compound <b>6</b> in DMSO- <i>d</i> <sub>6</sub> |
| S35: COSY spectrum of compound <b>6</b> in DMSO- <i>d</i> <sub>6</sub>                |
| S36: HSQC spectrum of compound <b>6</b> in DMSO- <i>d</i> <sub>6</sub>                |
| S37: HMBC spectrum of compound <b>6</b> in DMSO- <i>d</i> <sub>6</sub>                |

S38: HRMS of compound **6**

S39: NMR data of compound **8** in DMSO- $d_6$

S40:  $^1\text{H}$  NMR spectrum of compound **8** in DMSO- $d_6$

S41:  $^{13}\text{C}$  NMR spectrum of compound **8** in DMSO- $d_6$

S42: COSY spectrum of compound **8** in DMSO- $d_6$

S43: HSQC spectrum of compound **8** in DMSO- $d_6$

S44: HMBC spectrum of compound **8** in DMSO- $d_6$

S45: HRMS of compound **8**

S46: NMR data of compound **10** in DMSO- $d_6$

S47:  $^1\text{H}$  NMR spectrum of compound **10** in DMSO- $d_6$

S48:  $^{13}\text{C}$  NMR spectrum of compound **10** in DMSO- $d_6$

S49: COSY spectrum of compound **10** in DMSO- $d_6$

S50: HSQC spectrum of compound **10** in DMSO- $d_6$

S51: HMBC spectrum of compound **10** in DMSO- $d_6$

S52: HRMS of compound **10**

S53: NMR data of compound **11** in DMSO- $d_6$

S54:  $^1\text{H}$  NMR spectrum of compound **11** in DMSO- $d_6$

S55:  $^{13}\text{C}$  NMR spectrum of compound **11** in DMSO- $d_6$

S56: COSY spectrum of compound **11** in DMSO- $d_6$

S57: HSQC spectrum of compound **11** in DMSO- $d_6$

S58: HMBC spectrum of compound **11** in DMSO- $d_6$

S59: HRMS of compound **11**

S60: NMR data of compound **12** in DMSO- $d_6$

S61:  $^1\text{H}$  NMR spectrum of compound **12** in DMSO- $d_6$

S62:  $^{13}\text{C}$  NMR spectrum of compound **12** in DMSO- $d_6$

S63: COSY spectrum of compound **12** in DMSO- $d_6$

S64: HSQC spectrum of compound **12** in DMSO- $d_6$

S65: HMBC spectrum of compound **12** in DMSO- $d_6$

S66: ROESY spectrum of compound **12** in DMSO- $d_6$

S67: HRMS of compound **12**

S68: NMR data for compound **13** in DMSO- $d_6$

S69:  $^1\text{H}$  NMR spectrum of compound **13** in DMSO- $d_6$

S70:  $^{13}\text{C}$  NMR spectrum of compound **13** in DMSO- $d_6$

S71: COSY spectrum of compound **13** in DMSO- $d_6$

S72: HSQC spectrum of compound **13** in DMSO- $d_6$

S73: HMBC spectrum of compound **13** in DMSO- $d_6$

S74: ROESY spectrum of compound **13** in DMSO- $d_6$

S75: HRMS of compound **13**

S76: NMR data of compound **14** in DMSO-*d*<sub>6</sub>  
S77: <sup>1</sup>H NMR Spectrum of compound **14** in DMSO-*d*<sub>6</sub>  
S78: <sup>13</sup>C NMR spectrum of compound **14** in DMSO-*d*<sub>6</sub>  
S79: COSY spectrum of compound **14** in DMSO-*d*<sub>6</sub>  
S80: HSQC spectrum of compound **14** in DMSO-*d*<sub>6</sub>  
S81: HMBC spectrum of compound **14** in DMSO-*d*<sub>6</sub>  
S82: HRMS of compound **14**  
S83: NMR data of compound **15** in DMSO-*d*<sub>6</sub>  
S84: <sup>1</sup>H NMR spectrum of compound **15** in DMSO-*d*<sub>6</sub>  
S85: <sup>13</sup>C NMR spectrum of compound **15** in DMSO-*d*<sub>6</sub>  
S86: COSY spectrum of compound **15** in DMSO-*d*<sub>6</sub>  
S87: HSQC spectrum of compound **15** in DMSO-*d*<sub>6</sub>  
S88: HMBC spectrum of compound **15** in DMSO-*d*<sub>6</sub>  
S89: HRMS of compound **15**  
S90: NMR data of compound **16** in DMSO-*d*<sub>6</sub>  
S91: <sup>1</sup>H NMR Spectrum of compound **16** in DMSO-*d*<sub>6</sub>  
S92: <sup>13</sup>C NMR spectrum of compound **16** in DMSO-*d*<sub>6</sub>  
S93: COSY spectrum of compound **16** in DMSO-*d*<sub>6</sub>  
S94: HSQC spectrum of compound **16** in DMSO-*d*<sub>6</sub>  
S95: HMBC spectrum of compound **16** in DMSO-*d*<sub>6</sub>  
S96: HRMS of compound **16**  
S97: NMR data of compound **17** in DMSO-*d*<sub>6</sub>  
S98: <sup>1</sup>H NMR Spectrum of compound **17** in DMSO-*d*<sub>6</sub>  
S99: <sup>13</sup>C NMR spectrum of compound **17** in DMSO-*d*<sub>6</sub>  
S100: COSY spectrum of compound **17** in DMSO-*d*<sub>6</sub>  
S101: HSQC spectrum of compound **17** in DMSO-*d*<sub>6</sub>  
S102: HMBC spectrum of compound **17** in DMSO-*d*<sub>6</sub>  
S103: HRMS of compound **17**  
S104: NMR data of compound **18** in DMSO-*d*<sub>6</sub>  
S105: <sup>1</sup>H NMR spectrum of compound **18** in DMSO-*d*<sub>6</sub>  
S106: <sup>13</sup>C NMR spectrum of compound **18** in DMSO-*d*<sub>6</sub>  
S107: COSY spectrum of compound **18** in DMSO-*d*<sub>6</sub>  
S108: HSQC spectrum of compound **18** in DMSO-*d*<sub>6</sub>  
S109: HMBC spectrum of compound **18** in DMSO-*d*<sub>6</sub>  
S110: HRMS of compound **18**



**S1: NMR data of compound 2 in DMSO-*d*<sub>6</sub><sup>a</sup>**

| Pos. | δ <sub>H</sub> , mult. ( <i>J</i> in Hz), int. | δ <sub>C</sub> , mult. ( <i>J</i> in Hz) | COSY | HMBC       | ROESY      |
|------|------------------------------------------------|------------------------------------------|------|------------|------------|
| 3    |                                                | 145.5, s                                 |      |            |            |
| 5    |                                                | 143.8, s                                 |      |            |            |
| 6    | 7.60, s, 1H                                    | 108.8, s                                 |      | 5, 8       | 21         |
| 8    | 9.04, s, 1H                                    | 135.0, s                                 |      | 6, 9       |            |
| 9    |                                                | 147.4, s                                 |      |            |            |
| 10   |                                                | 124.7, s                                 |      |            |            |
| 11   | 7.77, m, 1H                                    | 132.6, s                                 | 12   | 3, 13, 15  | 12         |
| 12   | 7.30, m, 1H                                    | 117.6, s                                 | 11   | 10, 14     | 11         |
| 13   |                                                | 152.0, t (3.2)                           |      |            |            |
| 14   | 7.30, m, 1H                                    | 117.6, s                                 | 15   | 10, 12     | 15         |
| 15   | 7.77, m, 1H                                    | 132.6, s                                 | 14   | 3, 11, 13  | 14         |
| 17   | 7.36, t (73.7), 1H                             | 116.2, t (258.8)                         |      | 13         |            |
| 21   | 4.50, t (6.5), 2H                              | 71.2, s                                  |      | 5, 23      | 6, 22      |
| 22   | 2.90, t (6.5), 2H                              | 33.8, s                                  |      | 24, 28     | 21, 24, 28 |
| 23   |                                                | 137.3, s                                 |      |            |            |
| 24   | 6.91, m, 1H                                    | 128.3, s                                 | 25   | 22, 26, 28 | 22, 25     |
| 25   | 7.18, m, 1H                                    | 128.6, s                                 | 24   | 23, 27     | 24         |
| 26   | 7.16, m, 1H                                    | 126.3, s                                 |      | 24, 28     |            |
| 27   | 7.18, m, 1H                                    | 128.6, s                                 | 28   | 23, 25     | 28         |
| 28   | 6.91, m, 1H                                    | 128.3, s                                 | 27   | 22, 24, 26 | 22, 27     |

<sup>a</sup> Recorded at 500 MHz (<sup>1</sup>H NMR) and 125 MHz (<sup>13</sup>C NMR) at 25 °C.

**S2: <sup>1</sup>H NMR spectrum of compound 2 in DMSO-*d*<sub>6</sub>**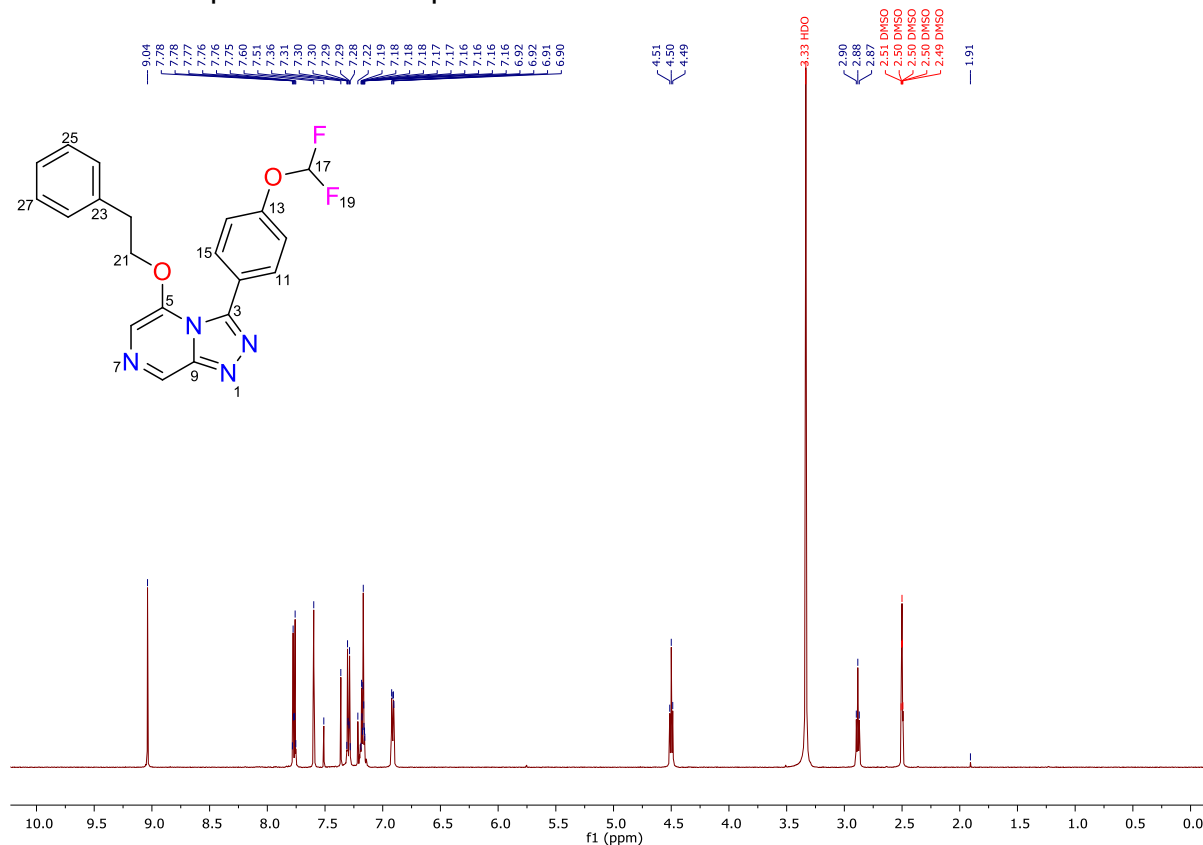

**S3:**  $^{13}\text{C}$  NMR spectrum of compound **2** in  $\text{DMSO-}d_6$

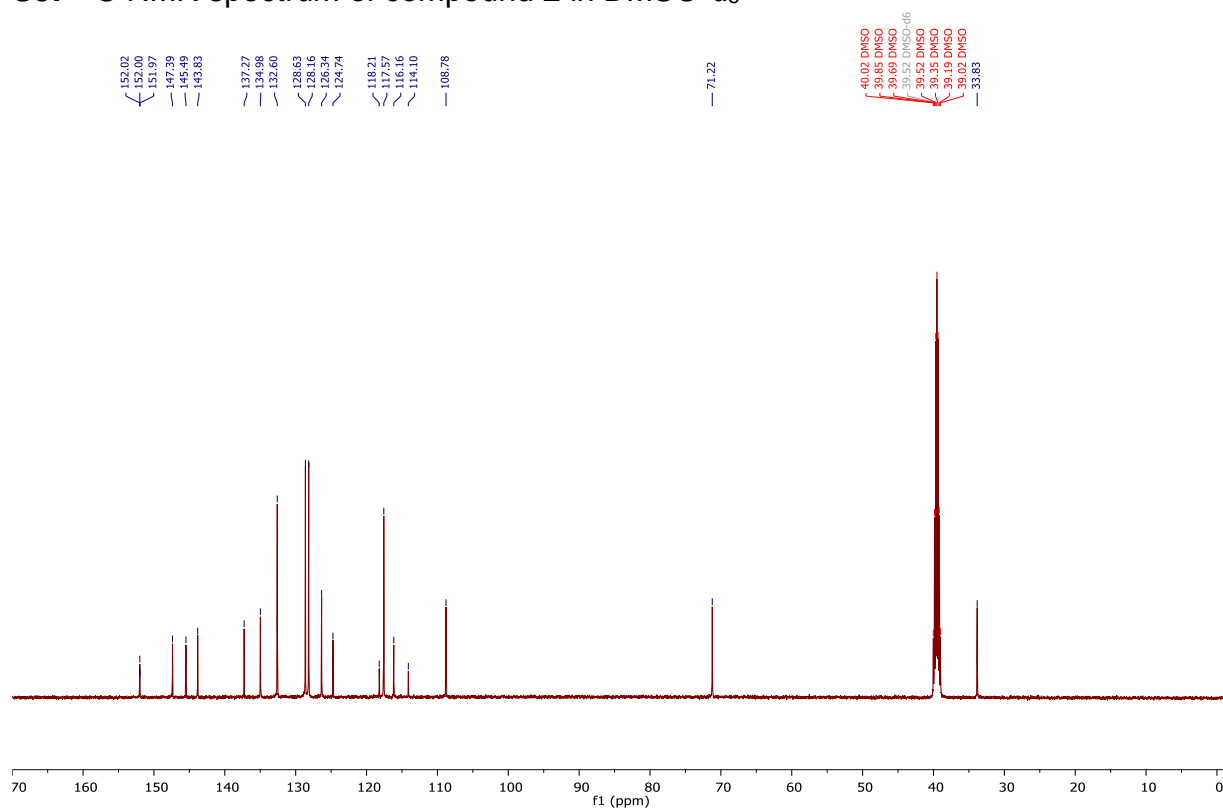

**S4:** COSY spectrum of compound **2** in  $\text{DMSO-}d_6$

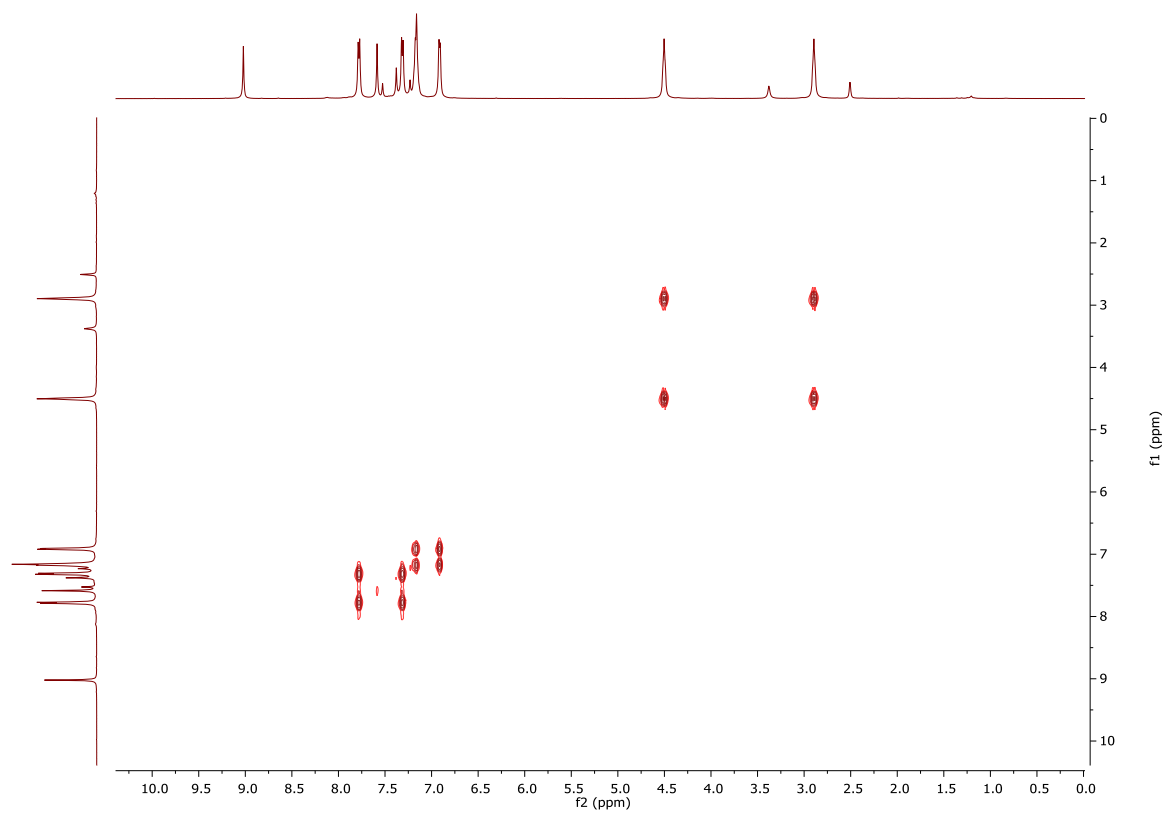

**S5:** HSQC spectrum of compound **2** in DMSO- $d_6$

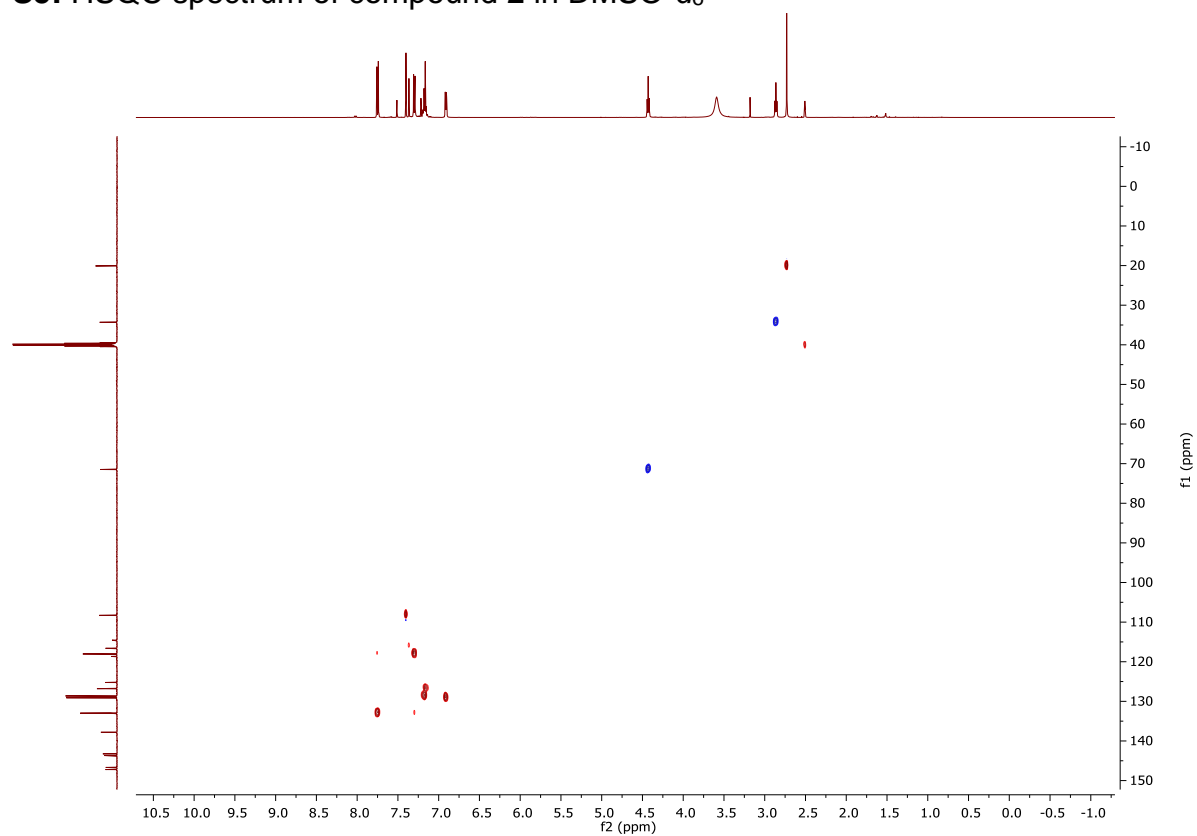

**S6:** HMBC spectrum of compound **2** in DMSO- $d_6$

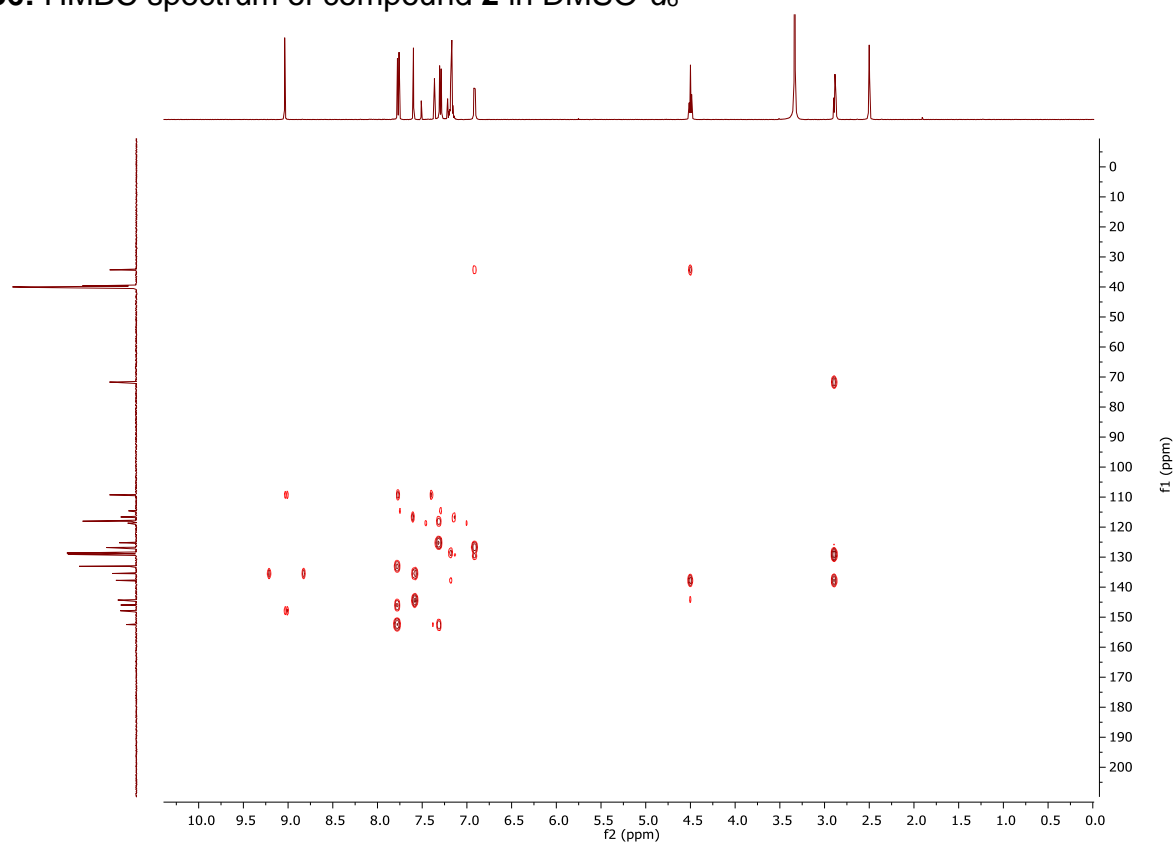

**S7: ROESY spectrum of compound 2 in DMSO- $d_6$**

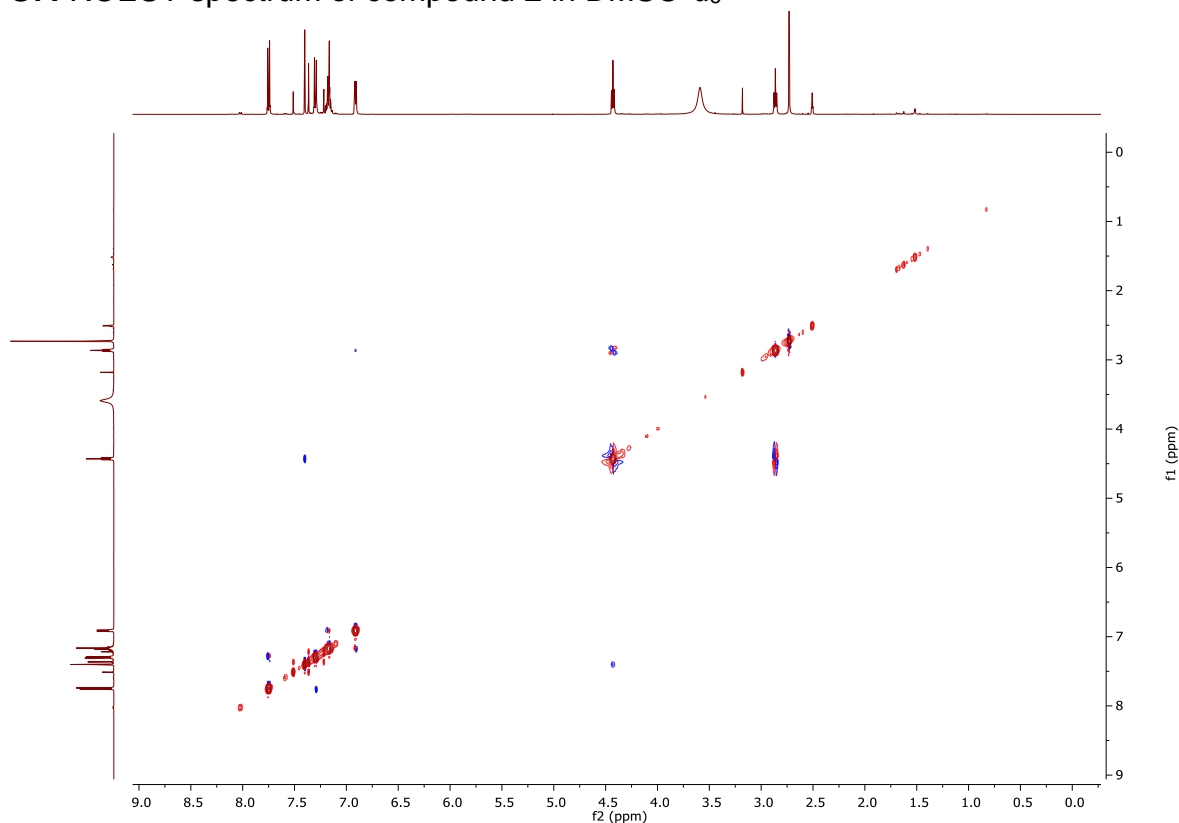

**S8: HRMS of compound 2**

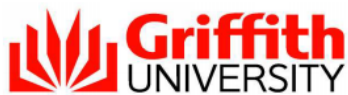

**High Resolution Mass Spectrum**

**Analysis Info**

Analysis Name D:\Data\KahYean\20200904\RAD815000001.d  
 Method DirectInfusion\_2018\_pos.m  
 Sample Name RAD815  
 Comment

Acquisition Date 9/18/2020 11:07:52 AM  
 Instrument maXis II ETD 1823391.22321

**+MS, 0.4-0.4min #21-22**

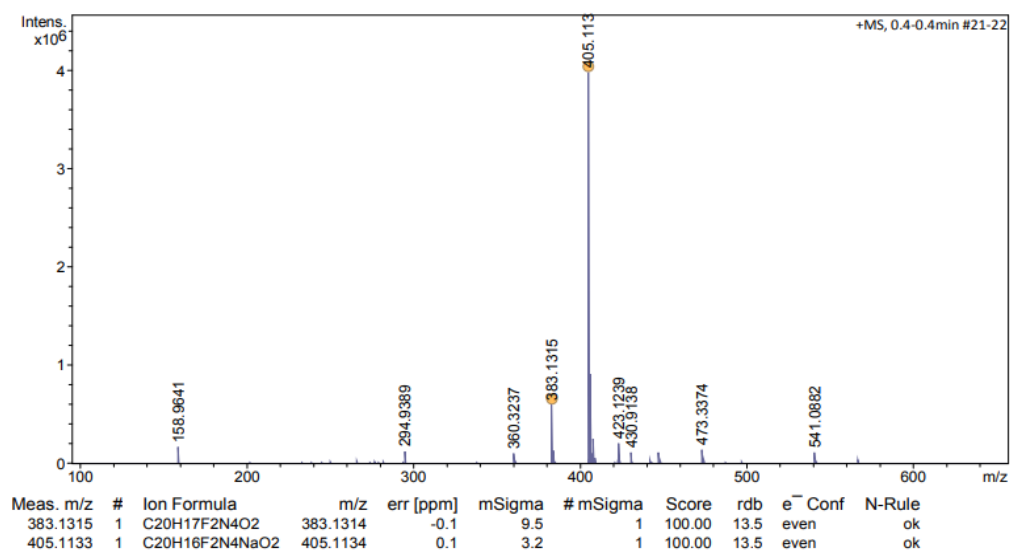

**S9:** NMR data of compound **3** in DMSO- $d_6^a$

| Pos. | $\delta_{\text{H}}$ , mult. ( $J$ in Hz), int. | $\delta_{\text{C}}$ , mult. ( $J$ in Hz) | COSY | HMBC      | ROESY |
|------|------------------------------------------------|------------------------------------------|------|-----------|-------|
| 3    |                                                | 145.7, s                                 |      |           |       |
| 5    |                                                | 142.6, s                                 |      |           |       |
| 6    | 7.69, s, 1H                                    | 109.7, s                                 |      | 5, 8      | 21    |
| 8    | 9.15, s, 1H                                    | 136.8, s                                 |      |           |       |
| 9    |                                                | 147.4, s                                 |      |           |       |
| 10   |                                                | 124.4, s                                 |      |           |       |
| 11   | 7.79, m, 1H                                    | 132.4, s                                 | 12   | 3, 13,15  | 12    |
| 12   | 7.29, m, 1H                                    | 117.7, s                                 | 11   | 10,14     | 11    |
| 13   |                                                | 152.0, t (3.2)                           |      |           |       |
| 14   | 7.29, m, 1H                                    | 117.7, s                                 | 15   | 10, 12    | 15    |
| 15   | 7.79, m, 1H                                    | 132.4, s                                 | 14   | 3, 11, 13 | 14    |
| 17   | 7.35, t (73.8), 1H                             | 116.1, t (258.8)                         |      | 13        |       |
| 21   | 5.05, q (8.5), 2H                              | 66.1, q (36.2)                           |      | 5, 22     | 6     |
| 22   |                                                | 122.6, q (277.2)                         |      |           |       |

<sup>a</sup> Recorded at 500 MHz (<sup>1</sup>H NMR) and 125 MHz (<sup>13</sup>C NMR) at 25 °C.

**S10:**  $^1\text{H}$  NMR spectrum of compound **3** in  $\text{DMSO}-d_6$

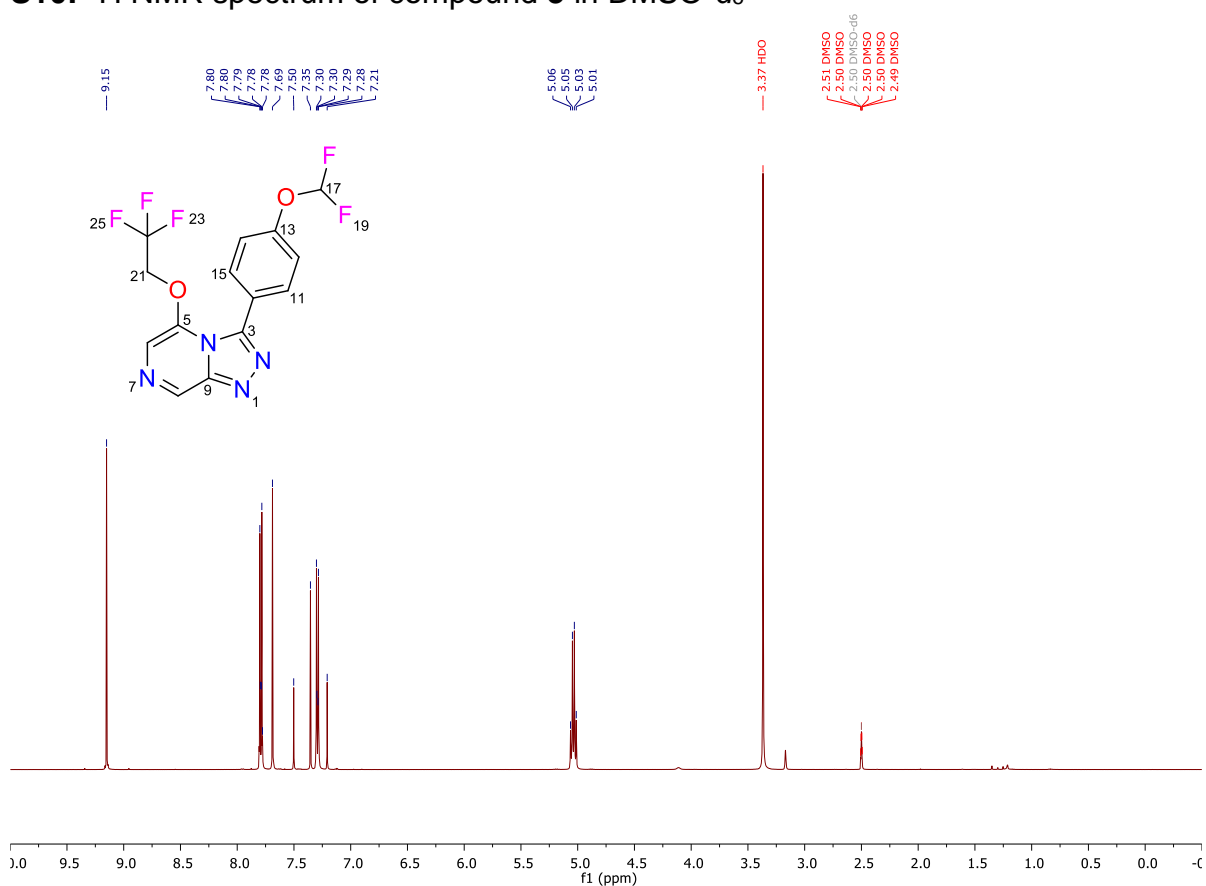

**S11:**  $^{13}\text{C}$  NMR spectrum of compound **3** in  $\text{DMSO}-d_6$

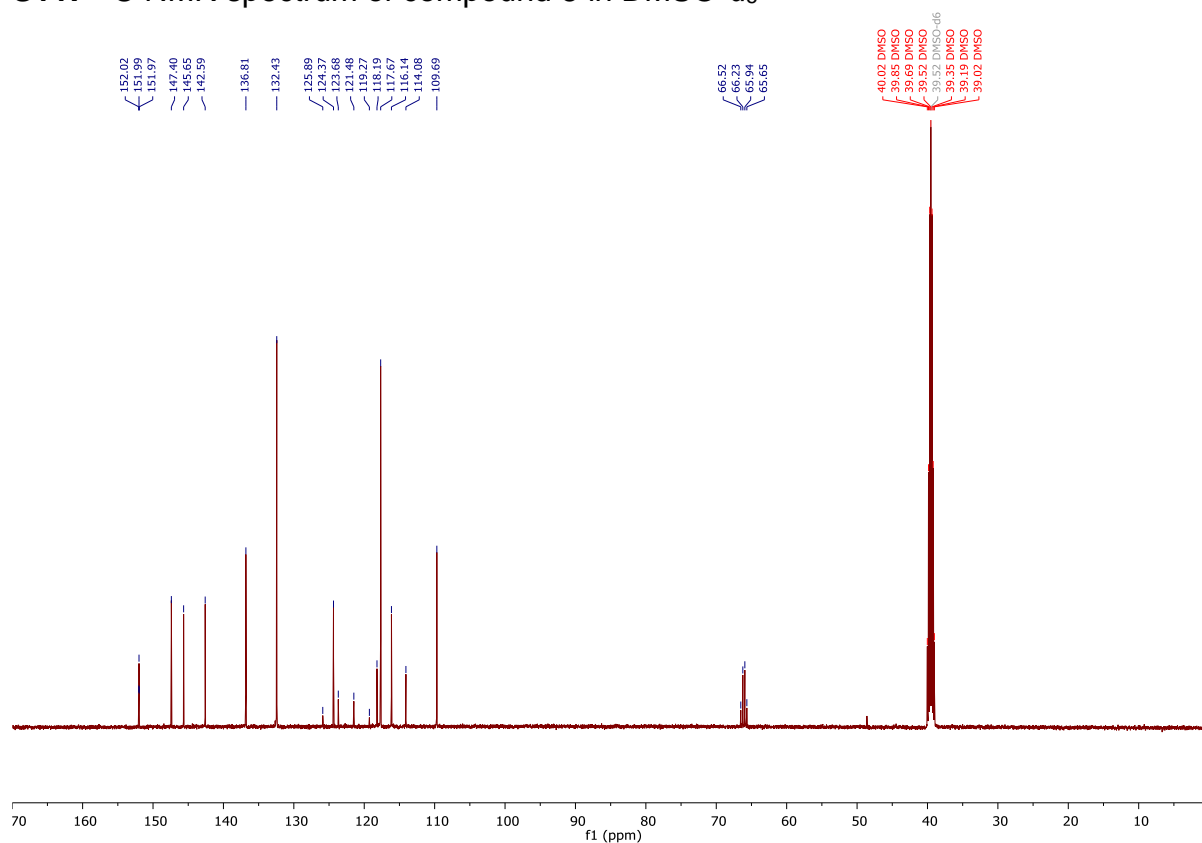

**S12:** COSY spectrum of compound **3** in  $\text{DMSO}-d_6$

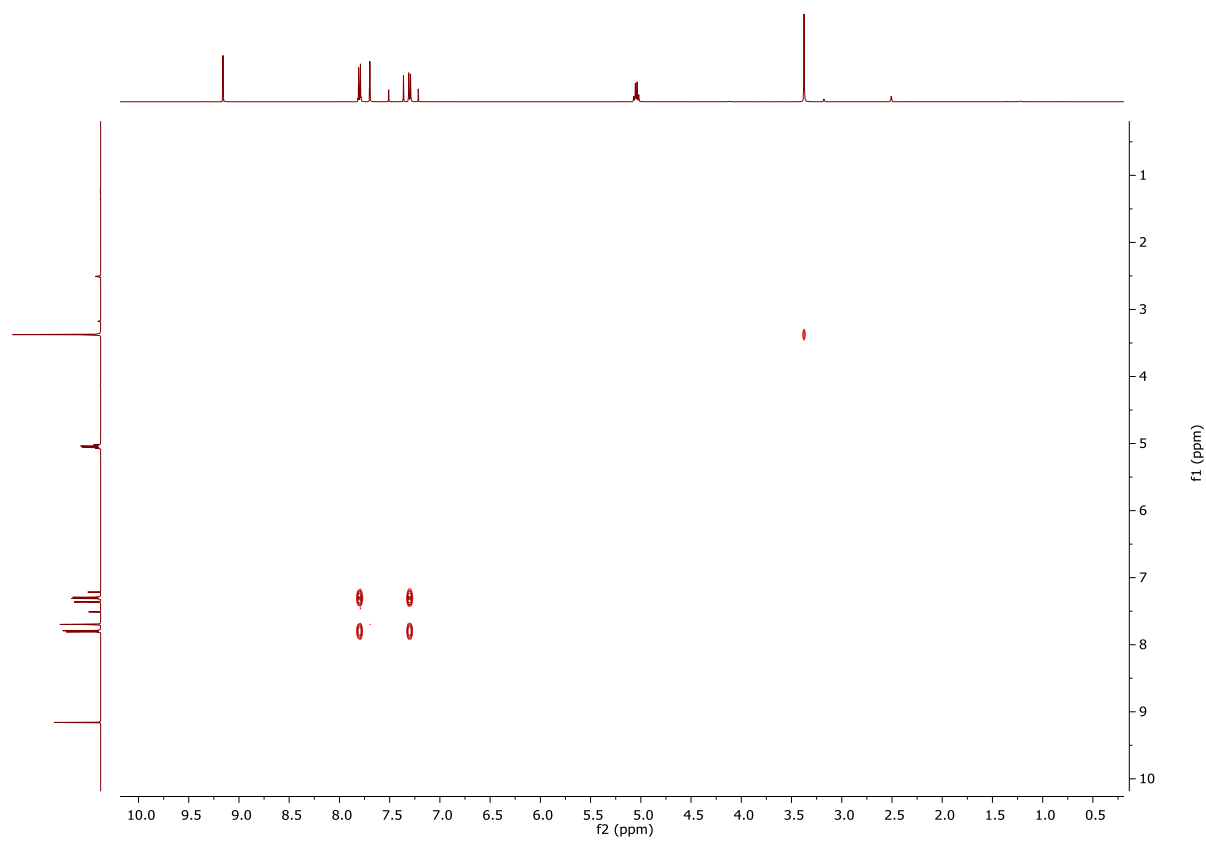

**S13:** HSQC spectrum of compound **3** in DMSO- $d_6$

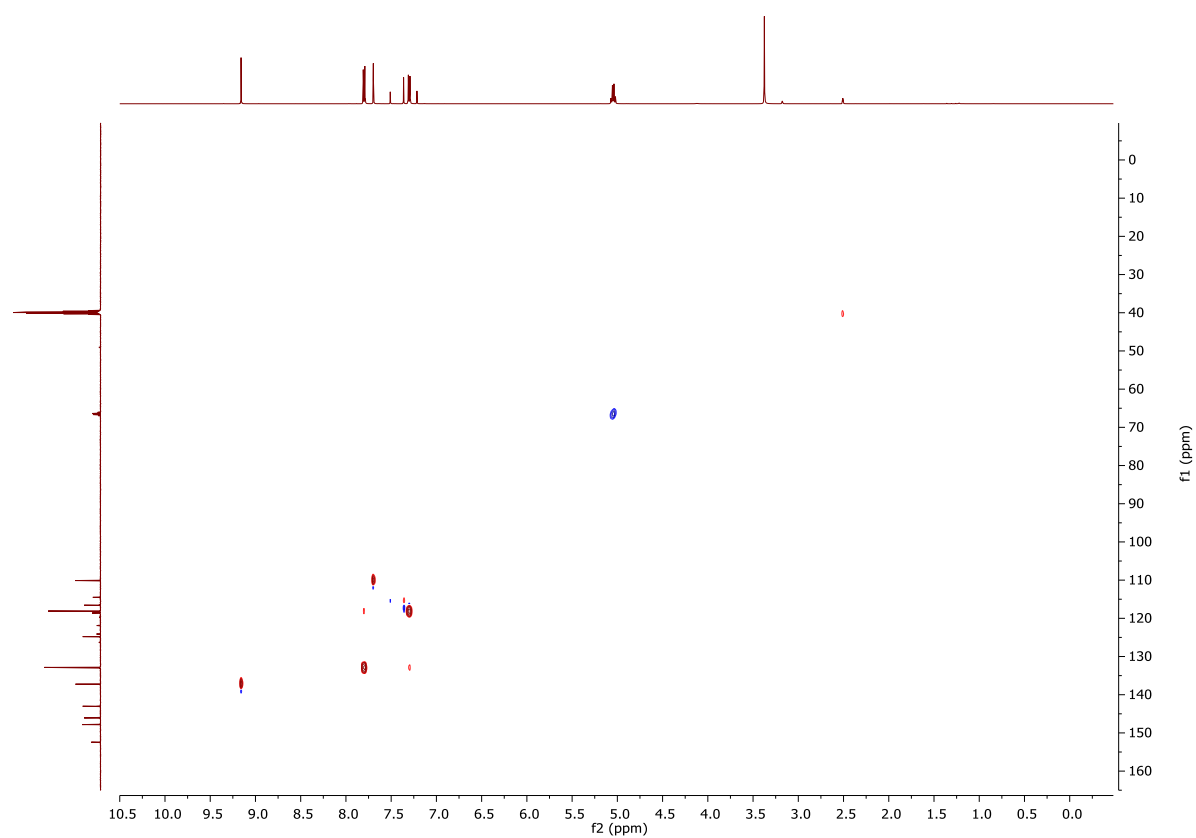

**S14:** HMBC spectrum of compound **3** in DMSO- $d_6$

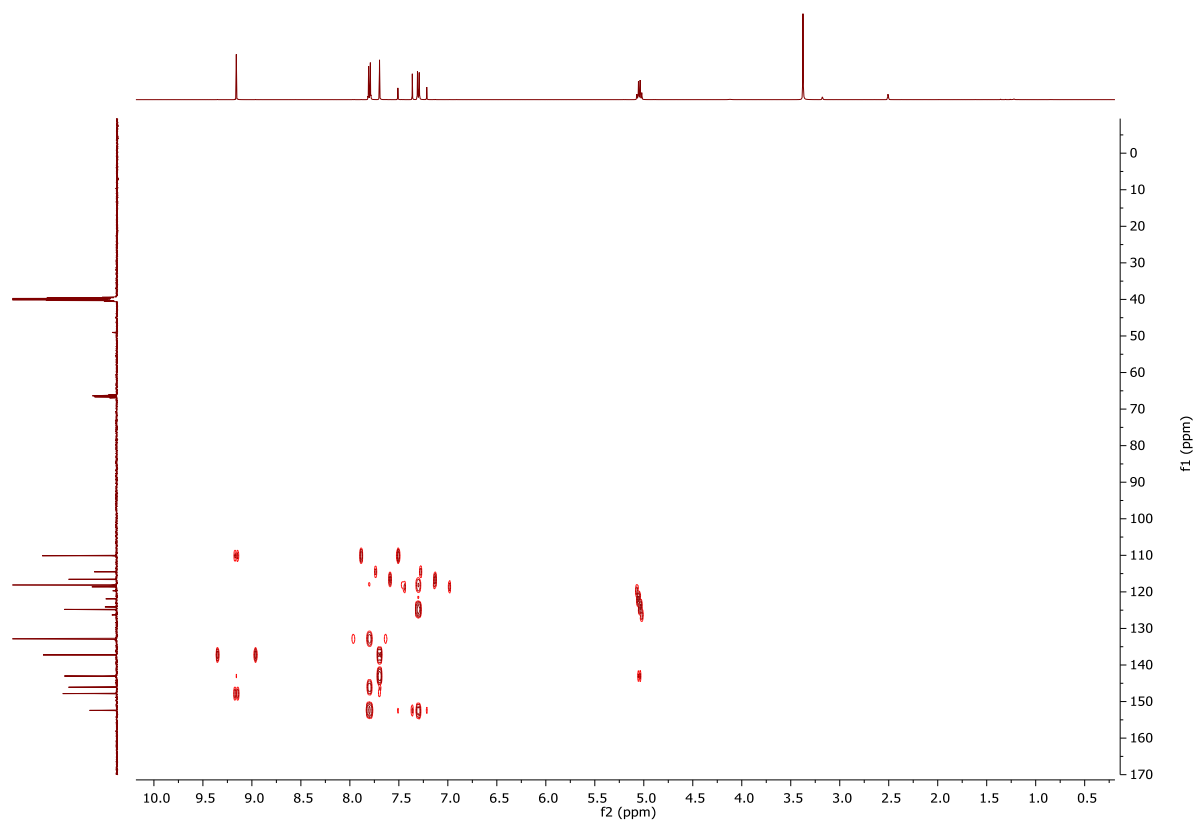

**S15:** ROESY spectrum of compound **3** in DMSO- $d_6$

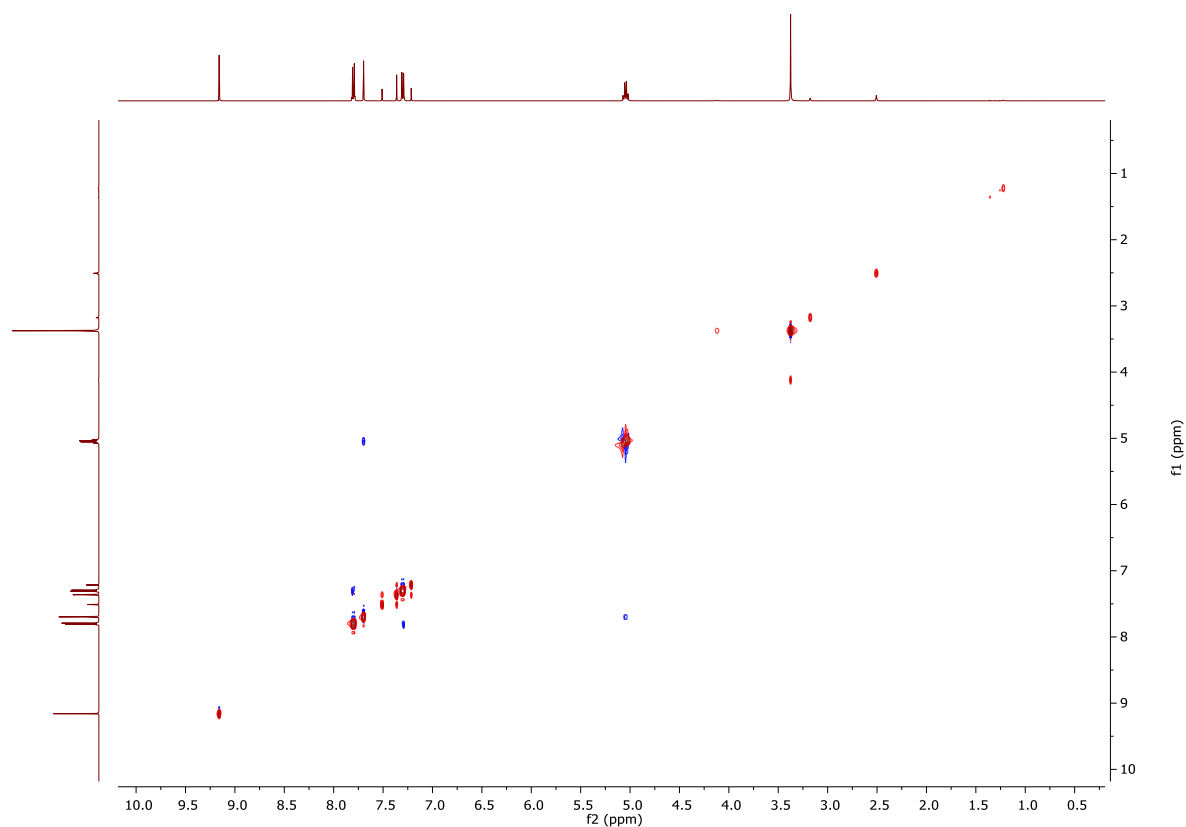

**S16:** HRMS of compound **3**

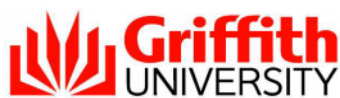

High Resolution Mass Spectrum

**Analysis Info**

Analysis Name D:\Data\KahYean\20200508\RAD863000002.d  
Method DirectInfusion\_2018\_pos.m  
Sample Name RAD863  
Comment

Acquisition Date 5/12/2020 12:03:48 PM  
Instrument maXis II ETD 1823391.22321

**+MS, 0.1min #8**

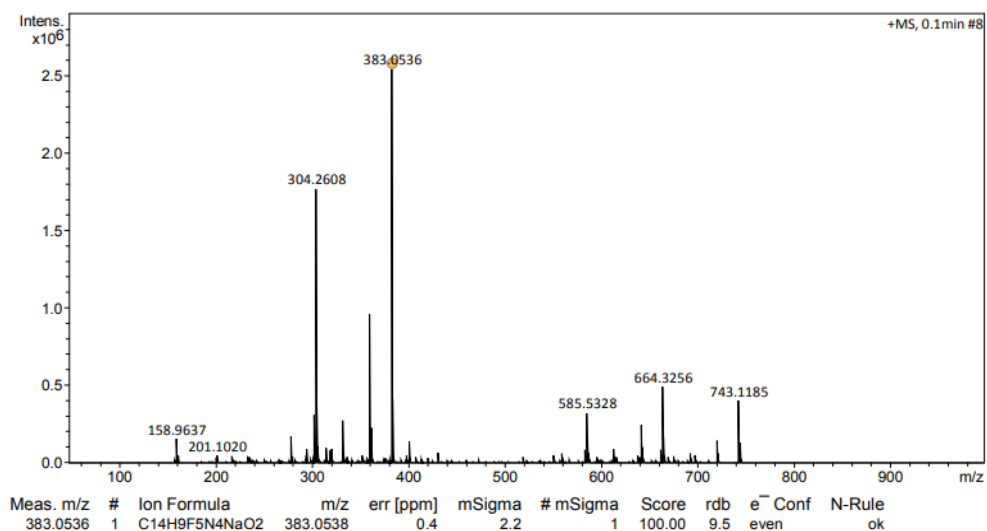



**S17:** NMR data of compound **4** in DMSO-*d*<sub>6</sub><sup>a</sup>

| Pos   | δ <sub>H</sub> , mult. ( <i>J</i> in Hz), int. | δ <sub>C</sub> , mult. ( <i>J</i> in Hz) | COSY | HMBC      |
|-------|------------------------------------------------|------------------------------------------|------|-----------|
| 3     |                                                | 148.6, s                                 |      |           |
| 5     | 7.43, d (5.8), 1H                              | 103.9, s                                 | 6    | 6, 9      |
| 6     | 6.92, d (5.8), 1H                              | 118.7, s                                 | 5    | 5, 8      |
| 8     |                                                | 153.0, s                                 |      |           |
| 9     |                                                | 145.3, s                                 |      |           |
| 10    |                                                | 122.6, s                                 |      |           |
| 11    | 7.91, m, 1H                                    | 130.4, s                                 | 12   | 3, 13,15  |
| 12    | 7.42, m, 1H                                    | 119.2, s                                 | 11   | 10,14     |
| 13    |                                                | 152.5, t (3.3)                           |      |           |
| 14    | 7.42, m, 1H                                    | 119.2, s                                 | 15   | 10, 12    |
| 15    | 7.91, m, 1H                                    | 130.4, s                                 | 14   | 3, 11, 13 |
| 17    | 7.40, t (73.6), 1H                             | 116.1, t (258.7)                         |      | 13        |
| 20-OH | 11.48, br s, 1H                                |                                          |      |           |

<sup>a</sup> Recorded at 500 MHz (<sup>1</sup>H NMR) and 125 MHz (<sup>13</sup>C NMR) at 25 °C.

**S18:** <sup>1</sup>H NMR spectrum of compound **4** in DMSO-*d*<sub>6</sub>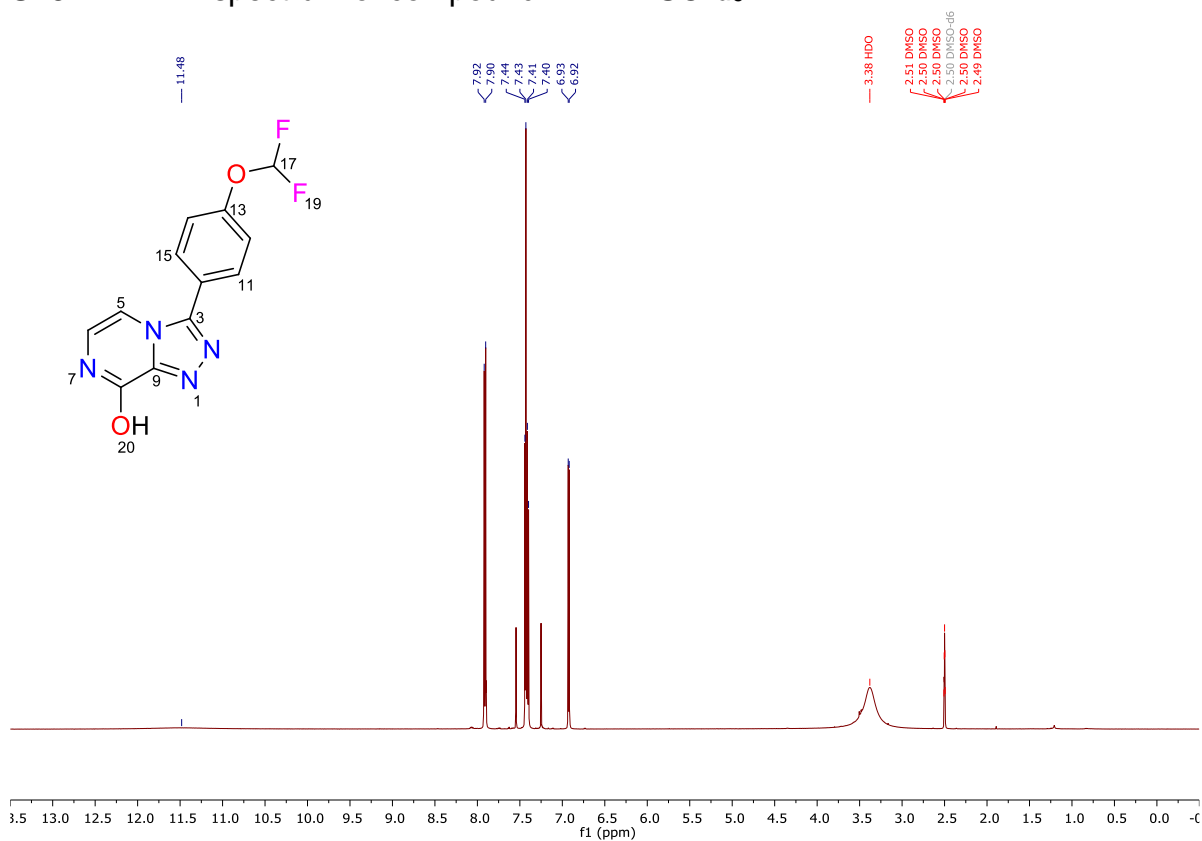

**S19:**  $^{13}\text{C}$  NMR spectrum of compound **4** in  $\text{DMSO}-d_6$

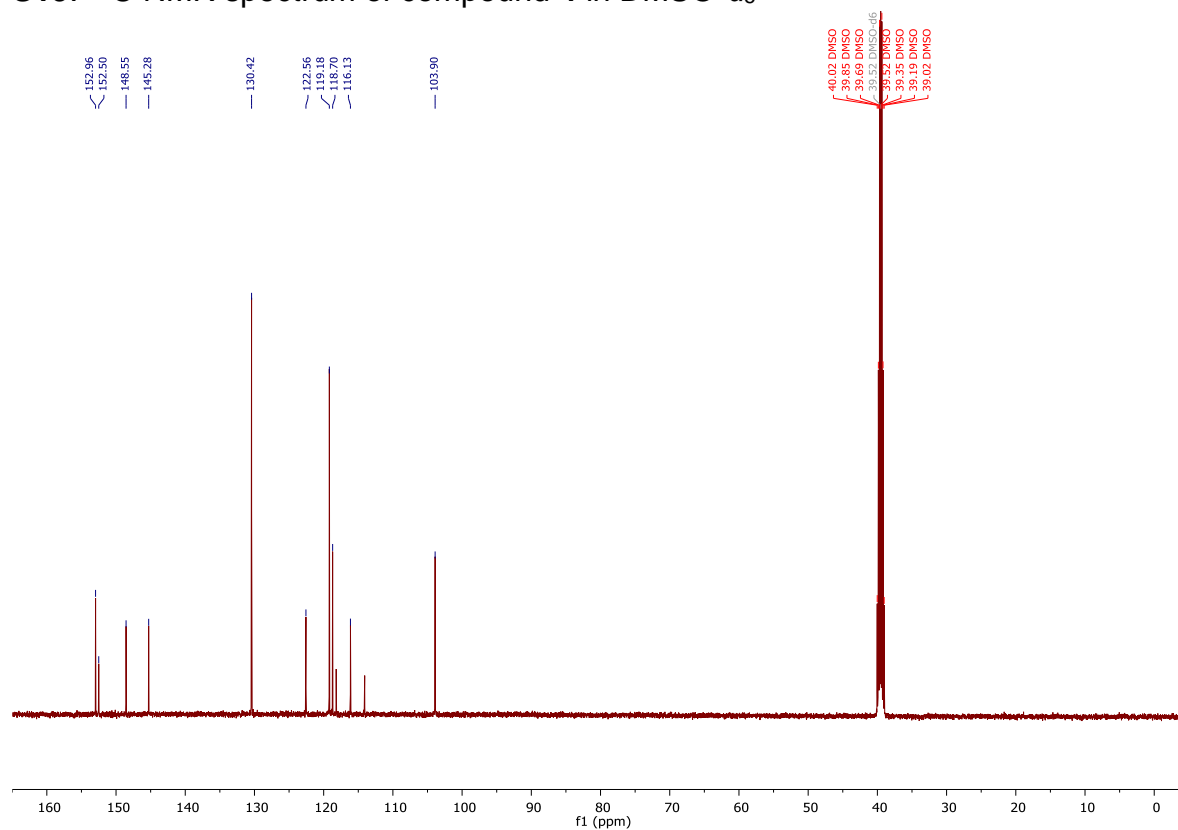

**S20:** COSY spectrum of compound **4** in  $\text{DMSO}-d_6$

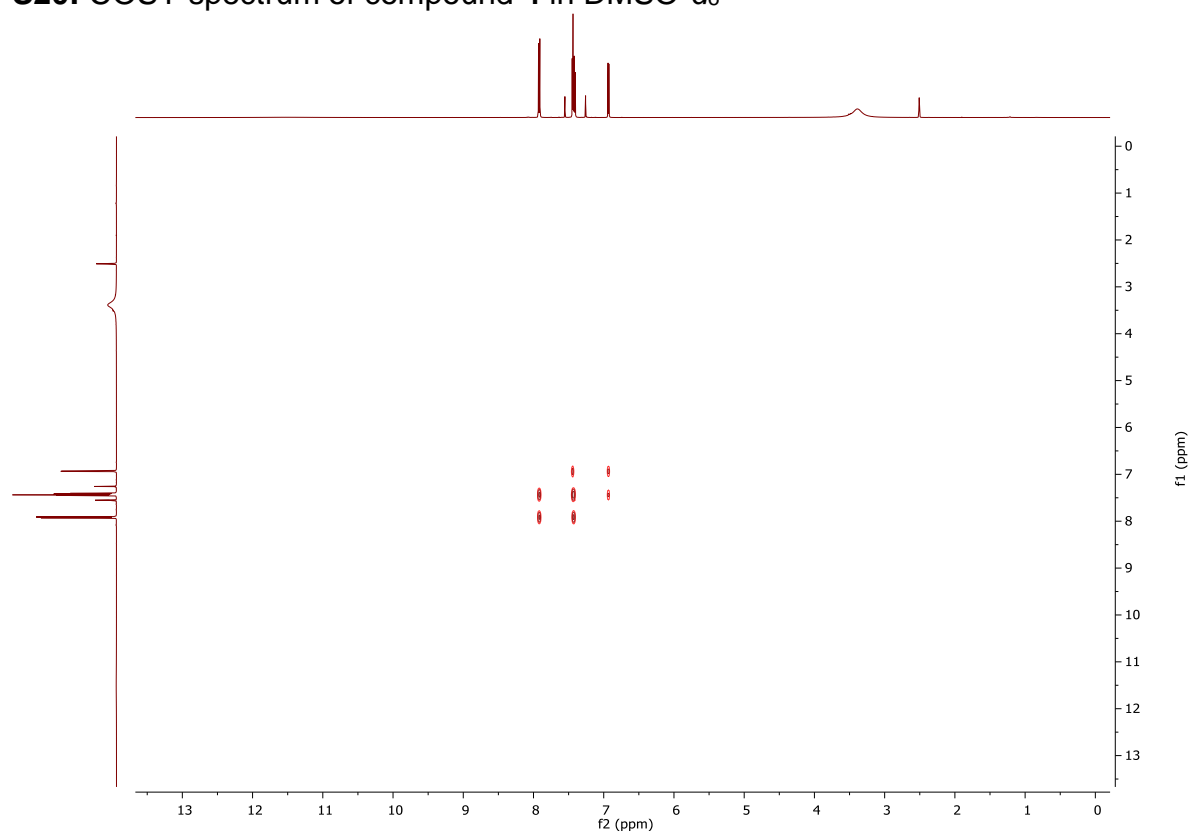

**S21:** HSQC spectrum of compound **4** in DMSO- $d_6$

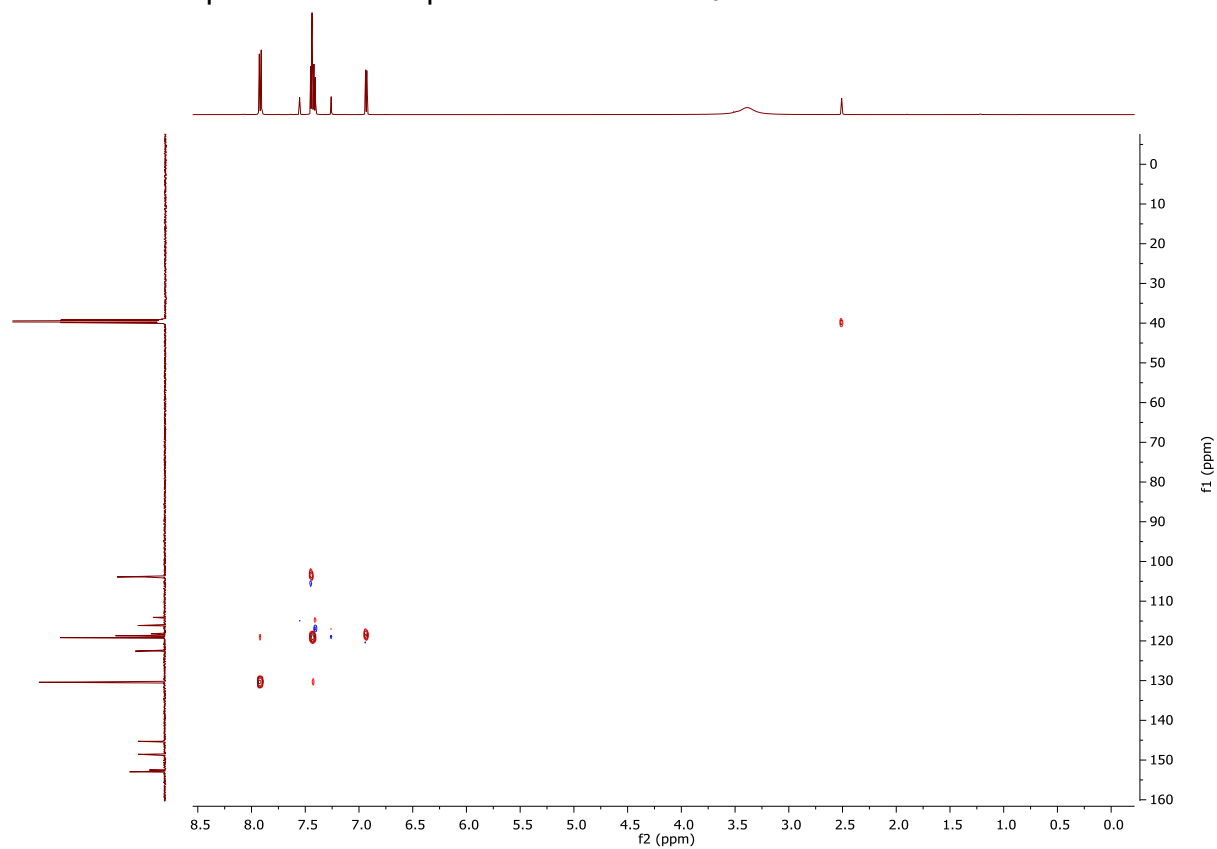

**S22:** HMBC spectrum of compound **4** in DMSO- $d_6$

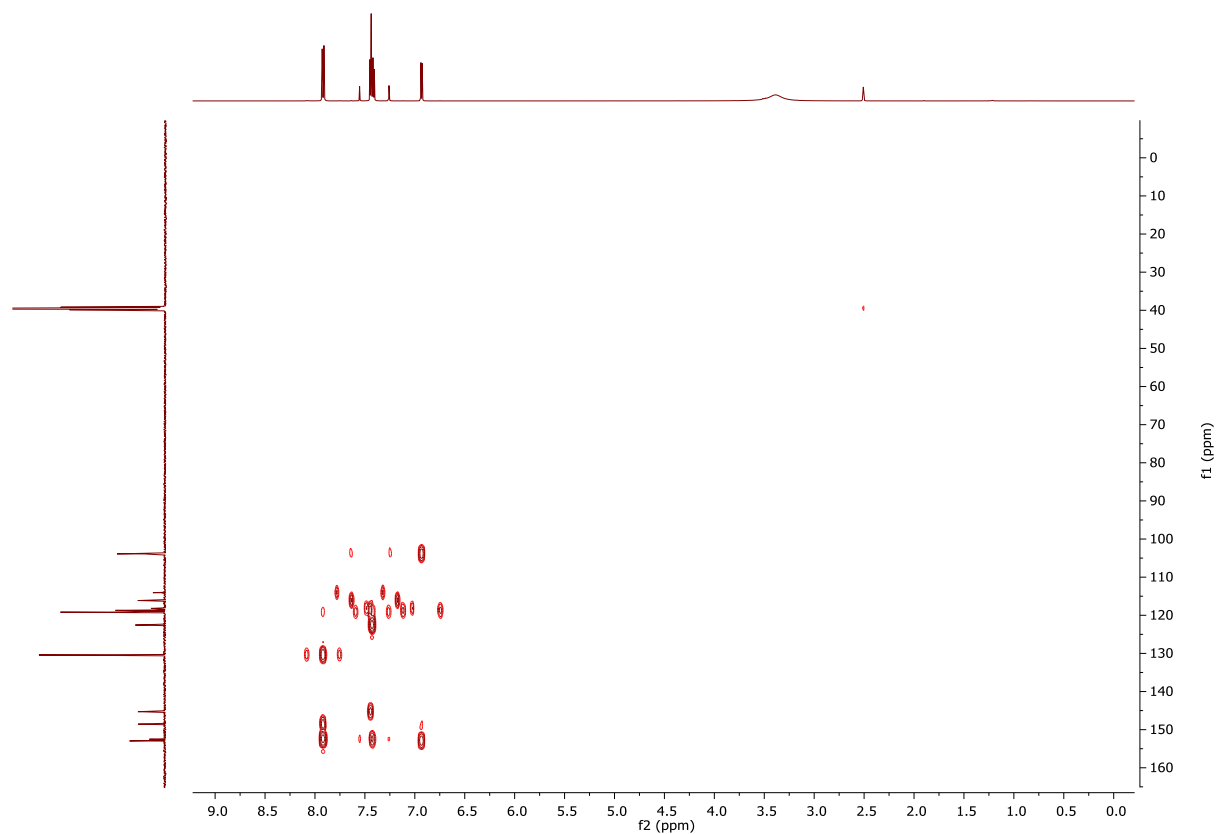

## S23: HRMS of compound 4

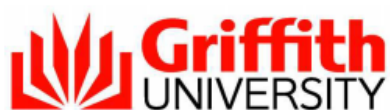

### High Resolution Mass Spectrum

#### Analysis Info

Analysis Name D:\Data\KahYean\20200508\RAD862000002.d  
Method DirectInfusion\_2018\_pos.m  
Sample Name RAD862  
Comment

Acquisition Date 5/12/2020 11:36:43 AM  
Instrument maXis II ETD 1823391.22321

#### +MS, 0.1-0.1min #7-8

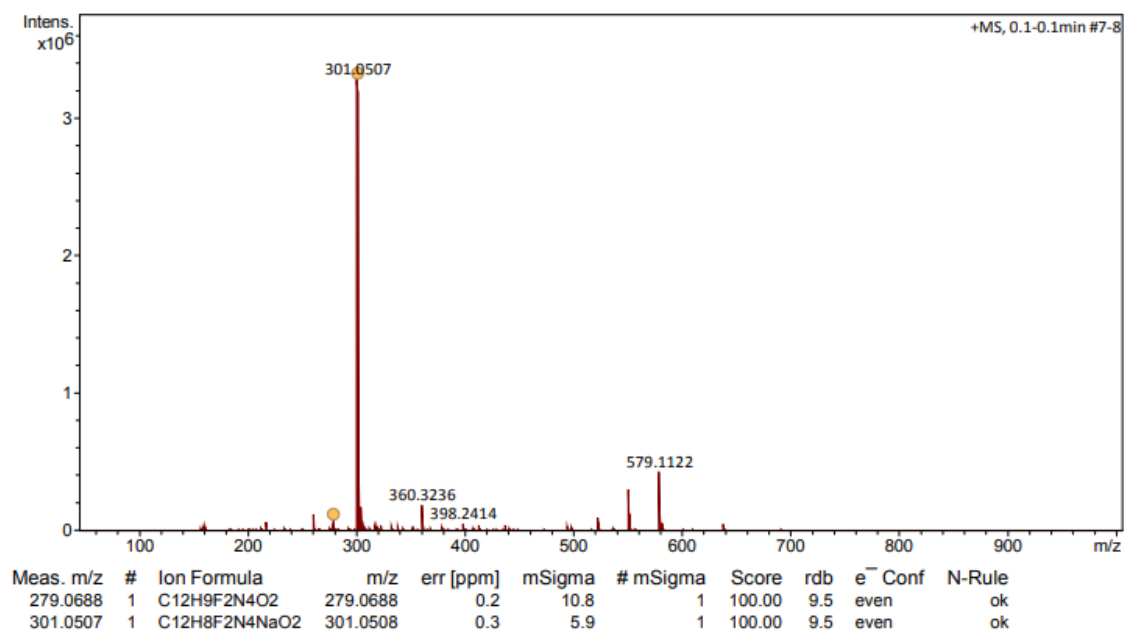

**S24:** NMR data of compound **5** in DMSO-*d*<sub>6</sub><sup>a</sup>

| Pos. | δ <sub>H</sub> , mult. ( <i>J</i> in Hz), int. | δ <sub>C</sub> , mult. ( <i>J</i> in Hz) | COSY | HMBC           | ROESY          |
|------|------------------------------------------------|------------------------------------------|------|----------------|----------------|
| 3    |                                                | 145.6, s                                 |      |                |                |
| 5    |                                                | 143.9, s                                 |      |                |                |
| 6    | 7.59, s, 1H                                    | 109.1, s                                 |      | 5, 8           | 21             |
| 8    | 9.01, s, 1H                                    | 134.7, s                                 |      | 6, 9           |                |
| 9    |                                                | 147.5, s                                 |      |                |                |
| 10   |                                                | 124.8, s                                 |      |                |                |
| 11   | 7.81, m, 1H                                    | 132.8, s                                 | 12   | 3, 13,15       | 12             |
| 12   | 7.31, m, 1H                                    | 117.6, s                                 | 11   | 10,14          | 11             |
| 13   |                                                | 151.9, t (3.3)                           |      |                |                |
| 14   | 7.31, m, 1H                                    | 117.6, s                                 | 15   | 10, 12         | 15             |
| 15   | 7.81, m, 1H                                    | 132.8, s                                 | 14   | 3, 11, 13      | 14             |
| 17   | 7.36, t (73.6), 1H                             | 116.1, t, (258.5)                        |      | 13             |                |
| 21   | 4.33, m, 2H                                    | 69.4, s                                  | 22   | 5, 22          | 6, 22          |
| 22   | 0.91, m, 2H                                    | 16.5, s                                  | 21   | 21, 24, 25, 26 | 21, 24, 25, 26 |
| 24   | 0.07, s, 3H                                    | -1.7, s                                  |      | 22, 25, 26     | 22             |
| 25   | 0.07, s, 3H                                    | -1.7, s                                  |      | 22, 24, 26     | 22             |
| 26   | 0.07, s, 3H                                    | -1.7, s                                  |      | 22, 24, 25     | 22             |

<sup>a</sup> Recorded at 500 MHz (<sup>1</sup>H NMR) and 125 MHz (<sup>13</sup>C NMR) at 25 °C.

**S25:** <sup>1</sup>H NMR spectrum of compound **5** DMSO-*d*<sub>6</sub>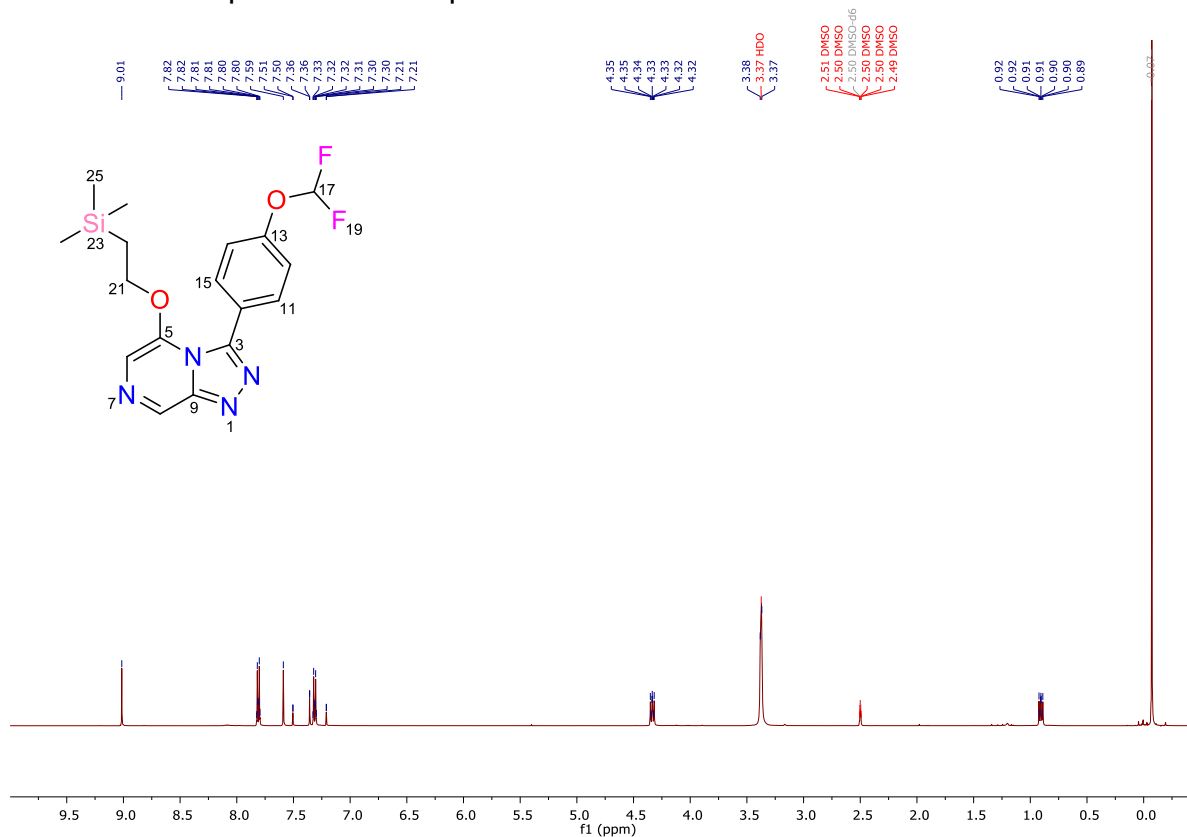

**S26:**  $^{13}\text{C}$  NMR spectrum of compound **5** in  $\text{DMSO}-d_6$

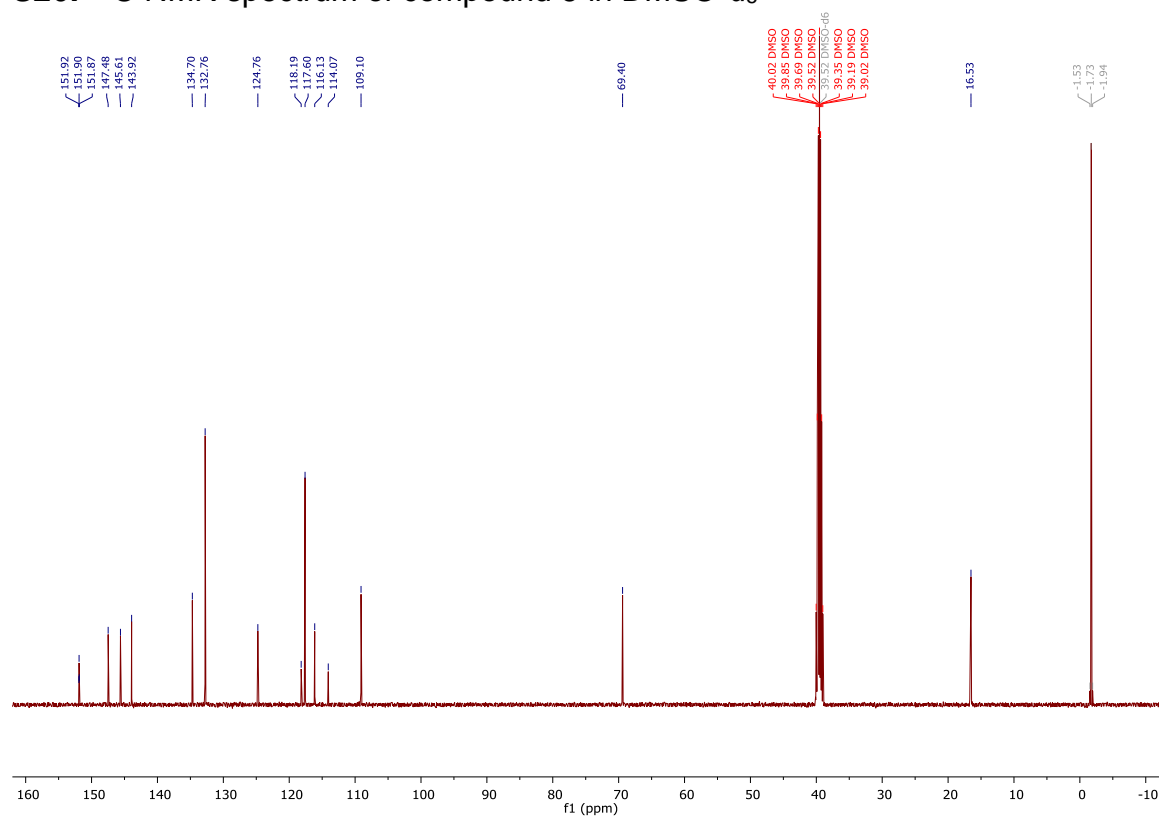

**S27:** COSY spectrum of compound **5** in  $\text{DMSO}-d_6$

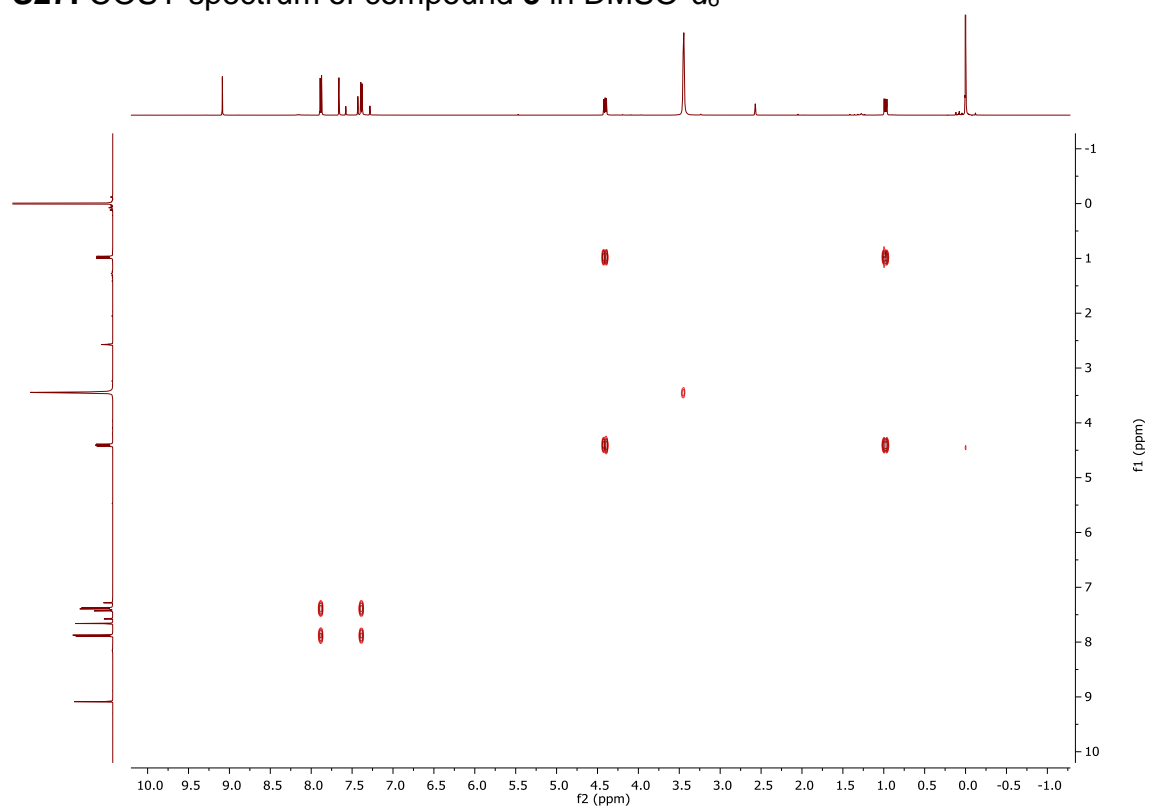

**S28:** HSQC spectrum of compound **5** in DMSO- $d_6$

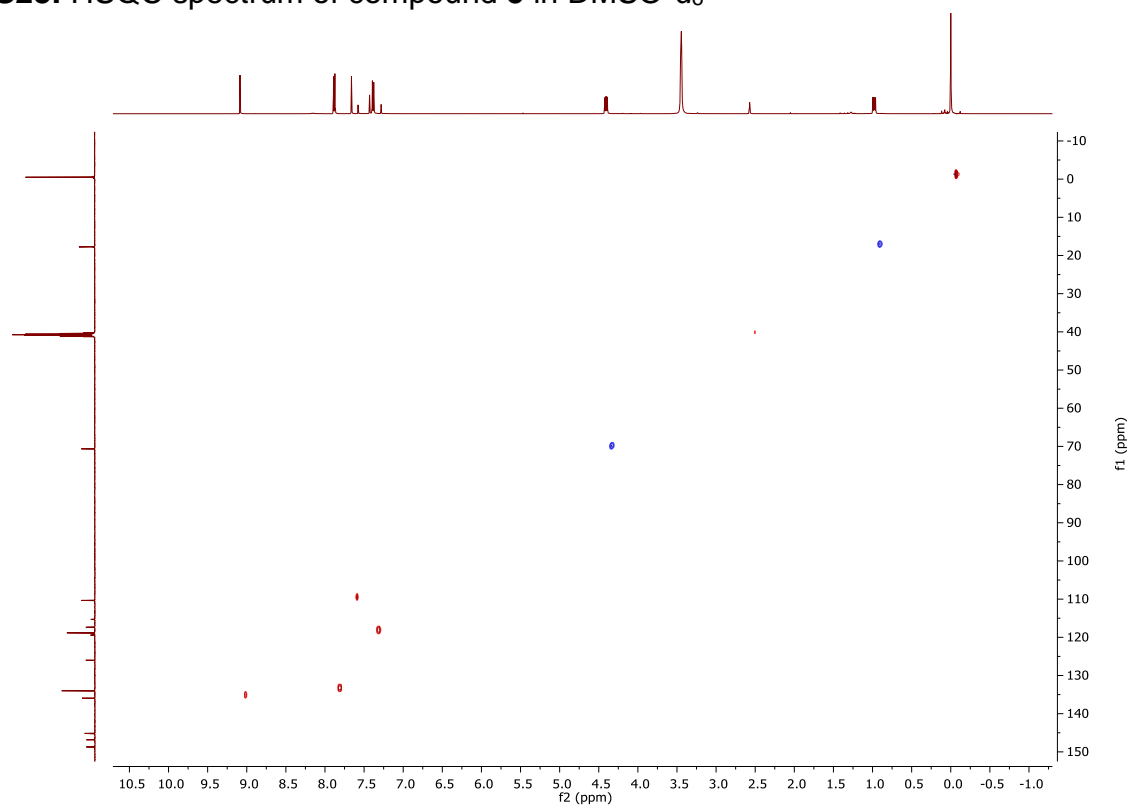

**S29:** HMBC spectrum of compound **5** in DMSO- $d_6$

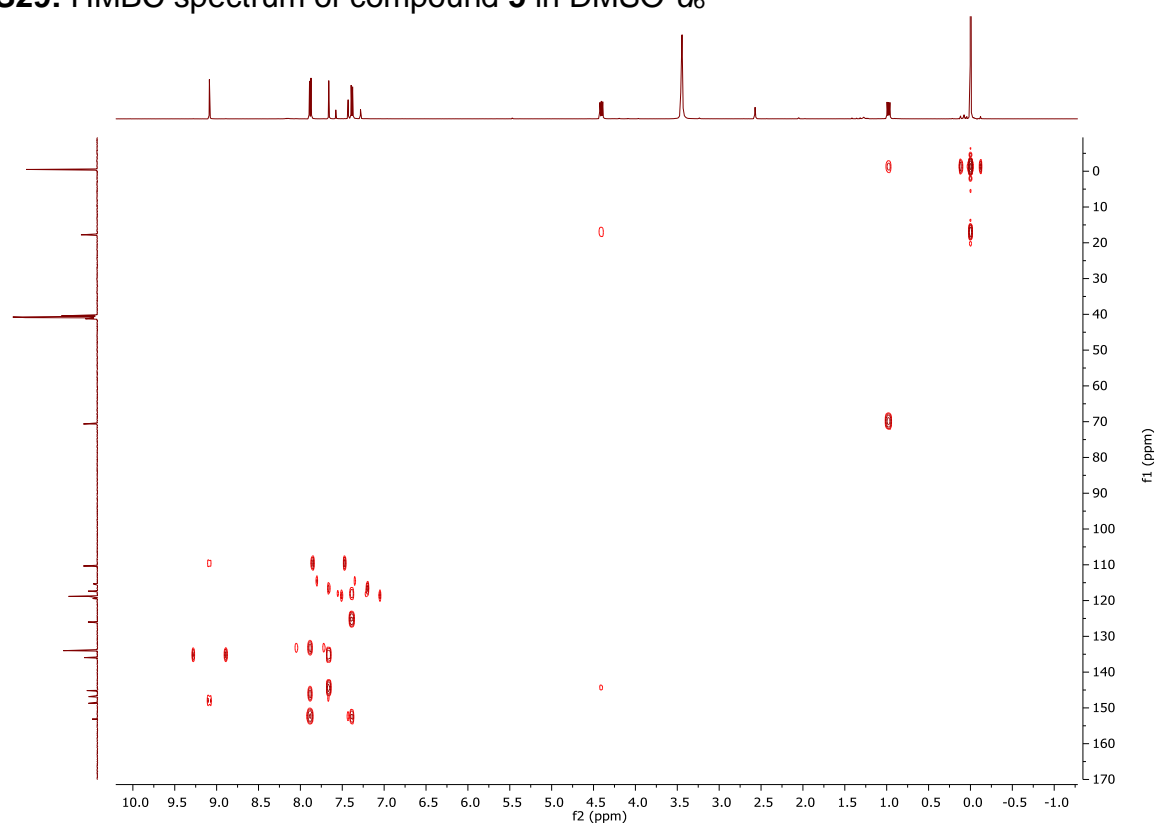

**S30:** ROESY spectrum of compound **5** in DMSO-*d*<sub>6</sub>

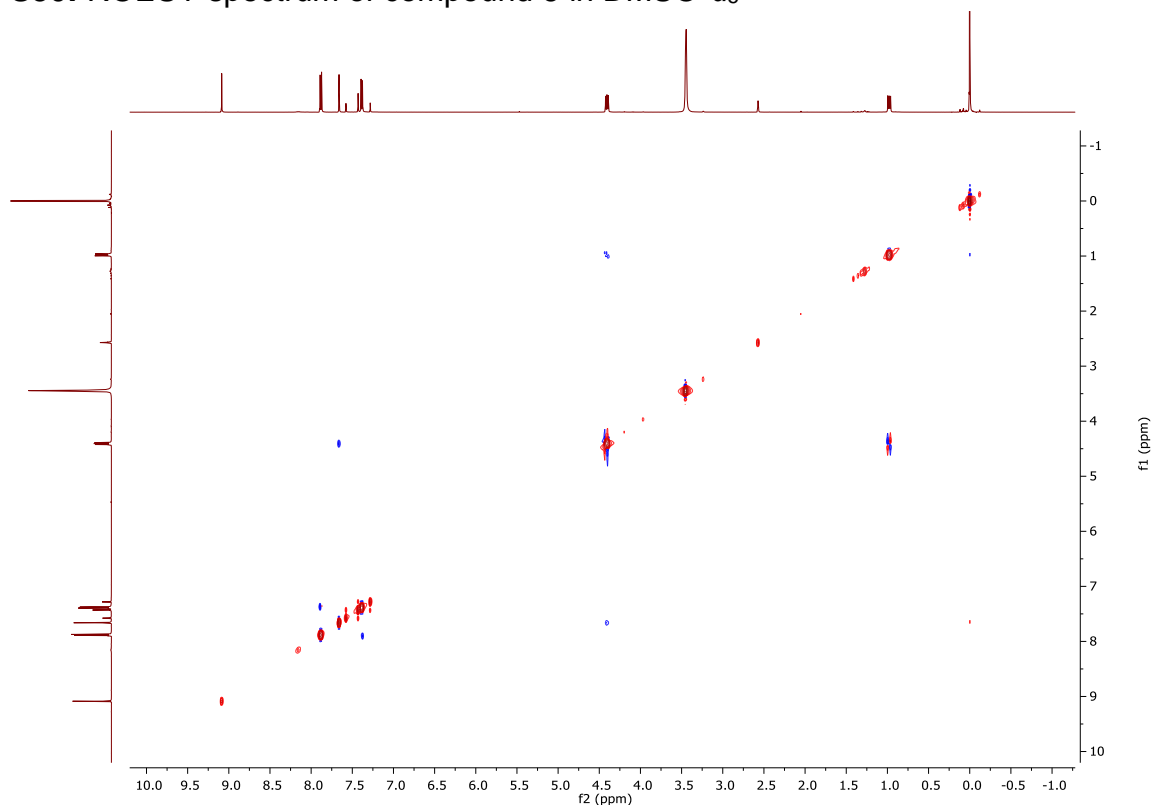

**S31:** HRMS of compound **5**

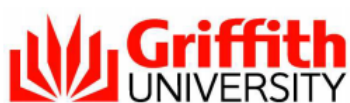

High Resolution Mass Spectrum

**Analysis Info**

Analysis Name D:\Data\KahYean\20200508\RAD860000001.d  
Method DirectInfusion\_2018\_pos.m  
Sample Name RAD860  
Comment

Acquisition Date 5/12/2020 12:13:02 PM  
Instrument maXis II ETD 1823391.22321

**+MS, 0.1-0.1min #5-6**

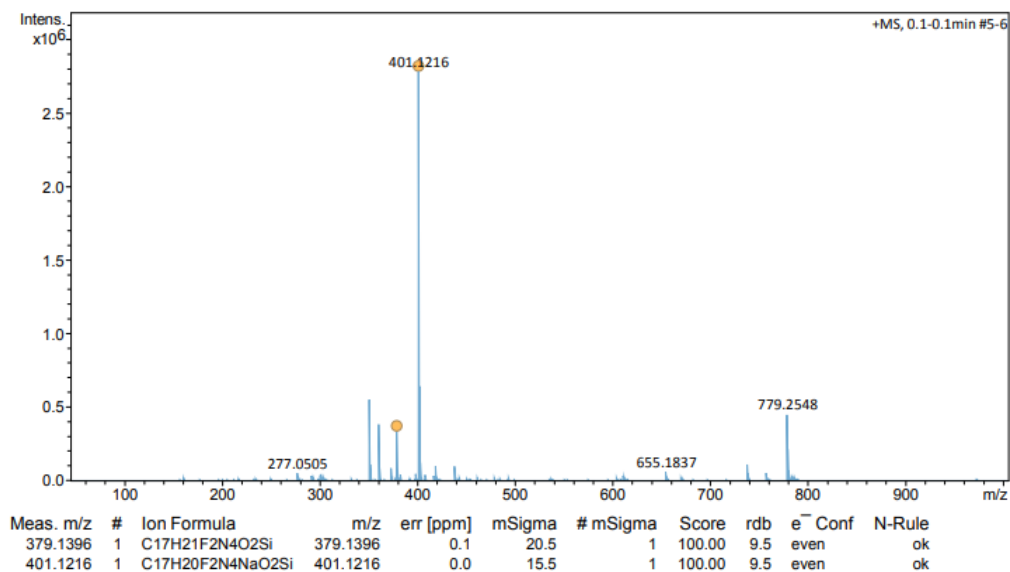



**S32:** NMR data of compound **6** in DMSO-*d*<sub>6</sub><sup>a</sup>

| Pos. | δ <sub>H</sub> , mult. ( <i>J</i> in Hz), int. | δ <sub>C</sub> , mult. ( <i>J</i> in Hz) | COSY | HMBC           |
|------|------------------------------------------------|------------------------------------------|------|----------------|
| 3    |                                                | 147.2, s                                 |      |                |
| 5    | 8.17, d (4.9), 1H                              | 111.9, s                                 | 6    | 6, 9           |
| 6    | 7.47, d (4.9), 1H                              | 127.6, s                                 | 5    | 5, 8           |
| 8    |                                                | 153.3, s                                 |      |                |
| 9    |                                                | 139.9, s                                 |      |                |
| 10   |                                                | 122.7, s                                 |      |                |
| 11   | 7.98, m, 1H                                    | 130.2, s                                 | 12   | 3, 13, 15      |
| 12   | 7.43, m, 1H                                    | 119.2, s                                 | 11   | 10, 14         |
| 13   |                                                | 152.4, t (3.3)                           |      |                |
| 14   | 7.43, m, 1H                                    | 119.2, s                                 | 15   | 10, 12         |
| 15   | 7.98, m, 1H                                    | 130.2, s                                 | 14   | 3, 11, 13      |
| 17   | 7.41, t (73.7), 1H                             | 116.1, t (258.4)                         |      | 13             |
| 21   | 4.65, m, 2H                                    | 65.2, s                                  | 22   | 22, 8          |
| 22   | 1.24, m, 2H                                    | 16.8, s                                  | 21   | 21, 24, 25, 26 |
| 24   | 0.11, s, 3H                                    | -1.3, s                                  |      | 22, 25, 26     |
| 25   | 0.11, s, 3H                                    | -1.3, s                                  |      | 22, 24, 26     |
| 26   | 0.11, s, 3H                                    | -1.3, s                                  |      | 22, 24, 25     |

<sup>a</sup> Recorded at 500 MHz (<sup>1</sup>H NMR) and 125 MHz (<sup>13</sup>C NMR) at 25 °C.**S33:** <sup>1</sup>H NMR spectrum of compound **6** in DMSO-*d*<sub>6</sub>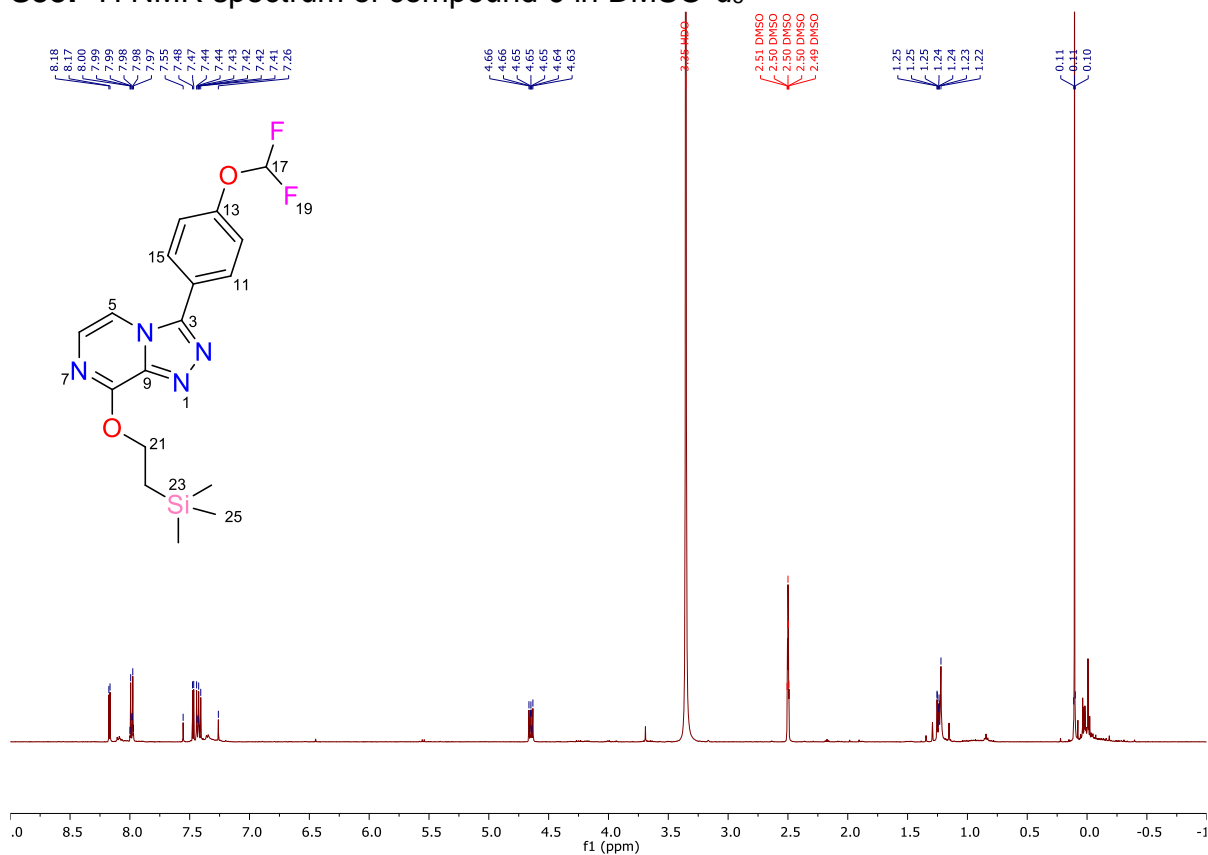

**S34:**  $^{13}\text{C}$  NMR spectrum of compound **6** in  $\text{DMSO}-d_6$

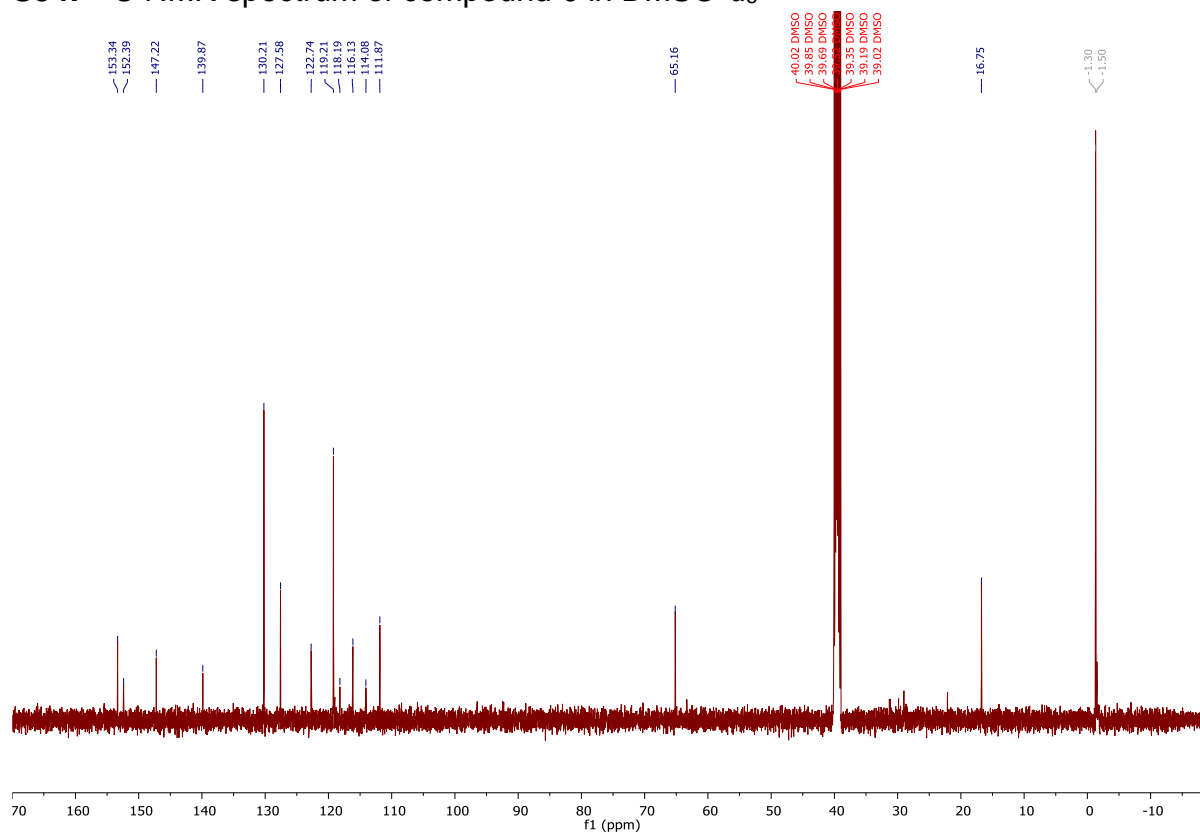

**S35:** COSY spectrum of compound **6** in  $\text{DMSO}-d_6$

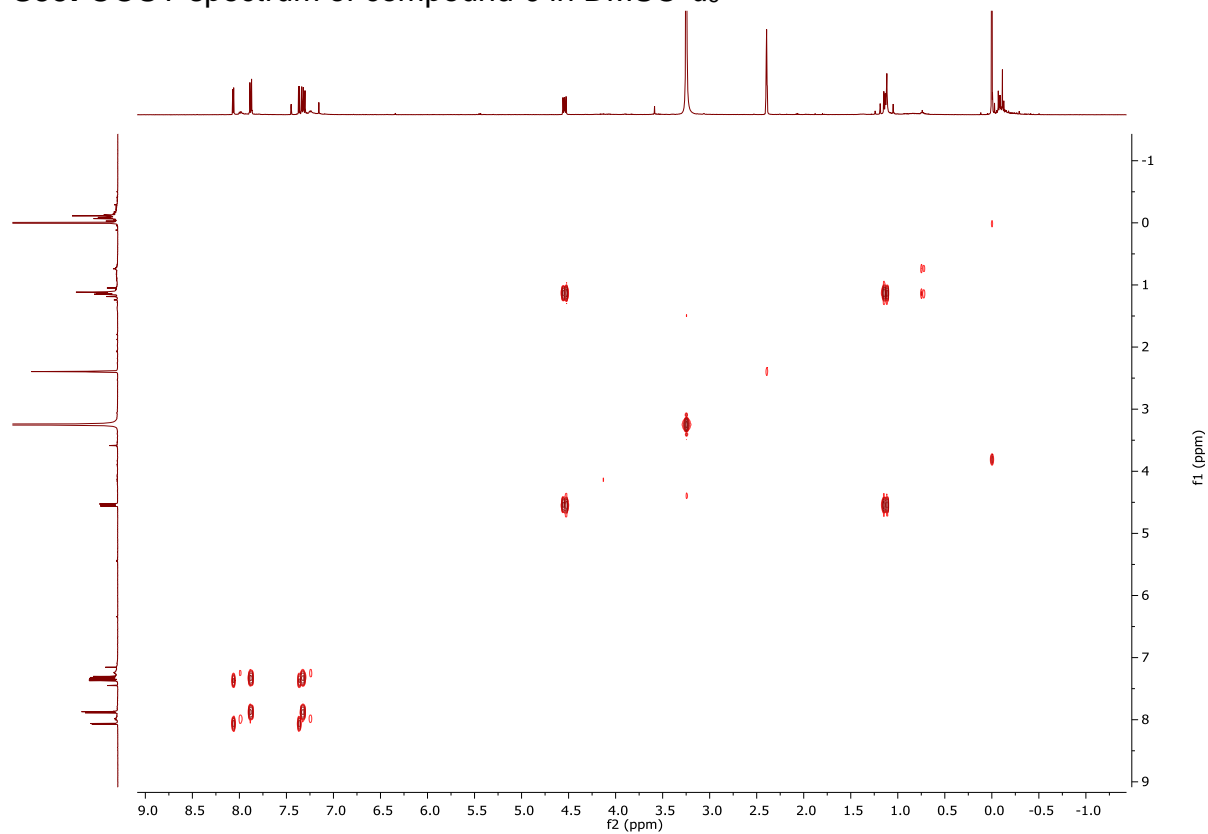

**S36:** HSQC spectrum of compound **6** in DMSO- $d_6$

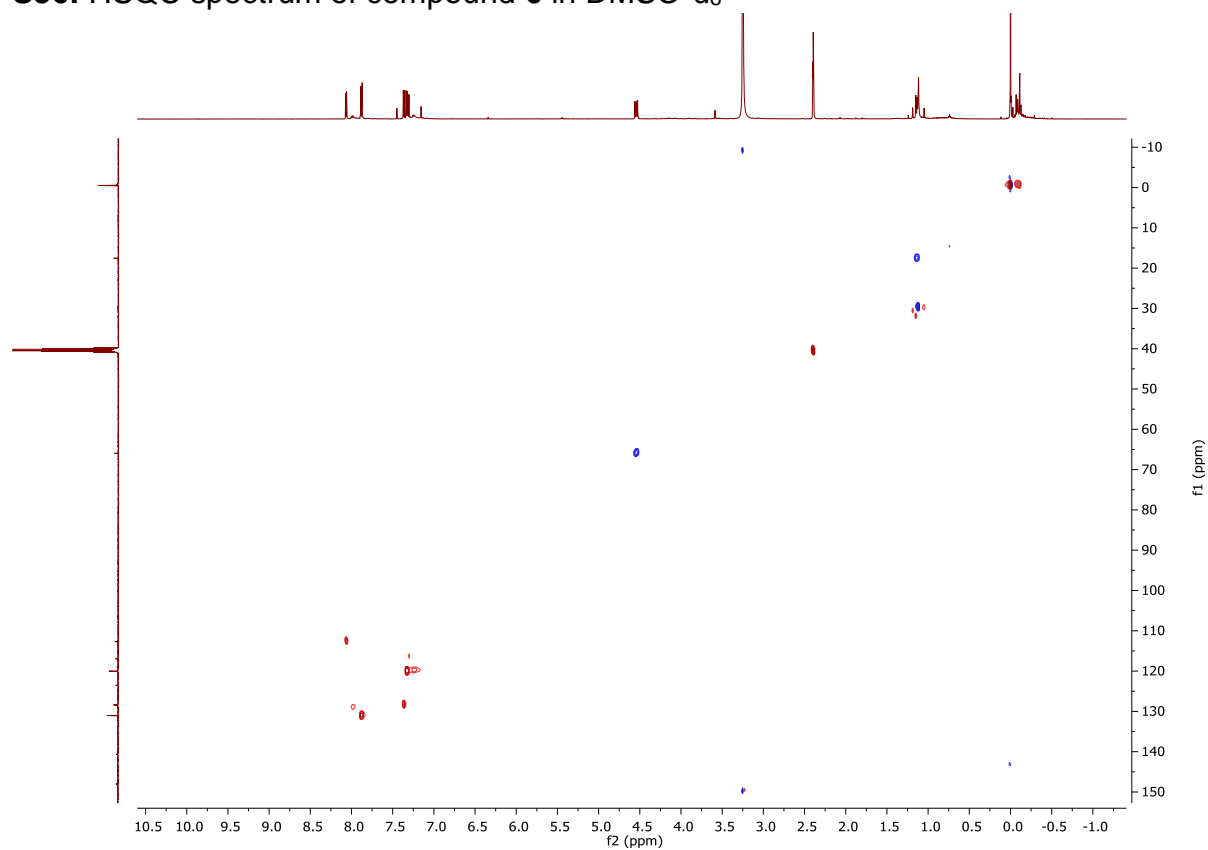

**S37:** HMBC spectrum of compound **6** in DMSO- $d_6$

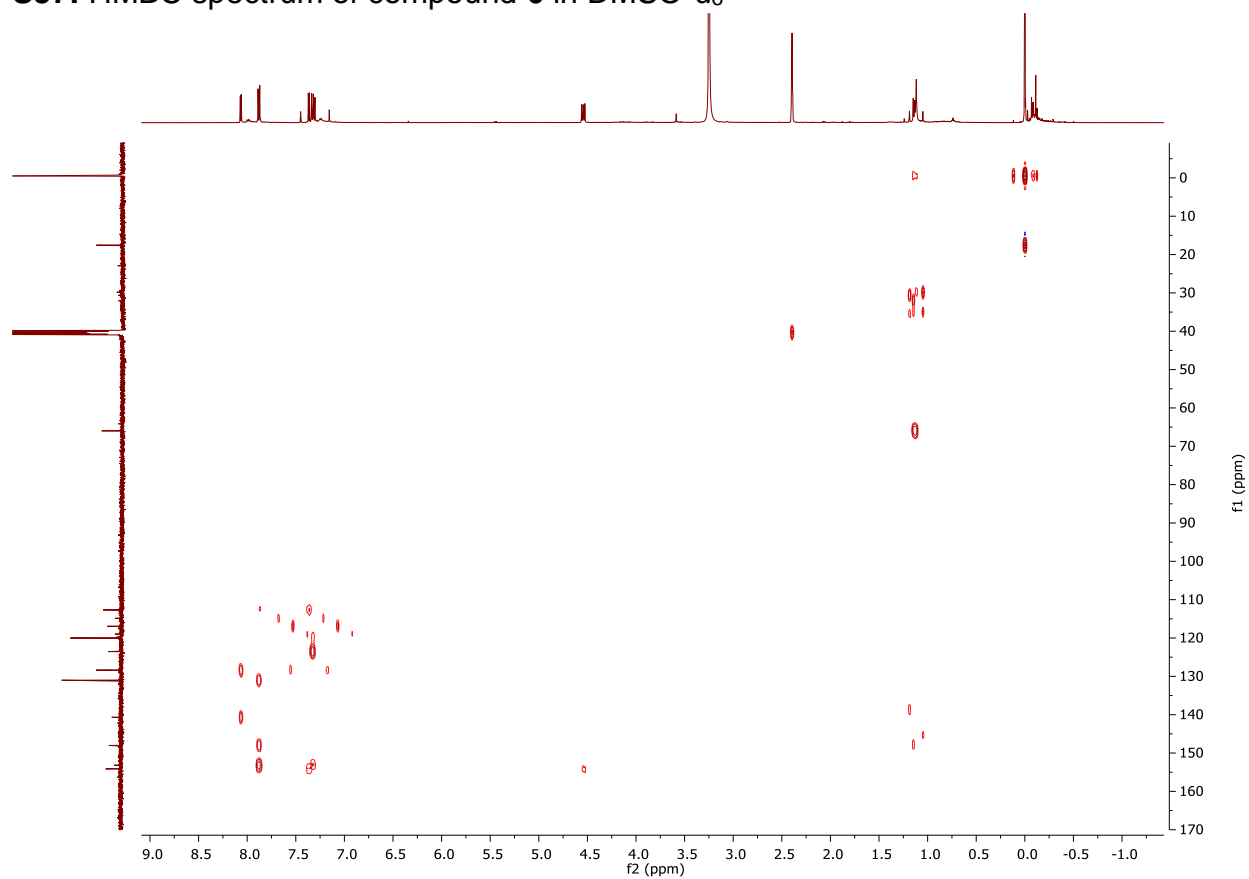

# S38: HRMS of compound 6

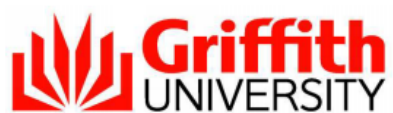

## High Resolution Mass Spectrum

### Analysis Info

Analysis Name D:\Data\KahYean\20200508\RAD861000002.d  
Method DirectInfusion\_2018\_pos.m  
Sample Name RAD861  
Comment

Acquisition Date 5/12/2020 12:26:20 PM  
Instrument maXis II ETD 1823391.22321

### +MS, 0.7-0.7min #38-39

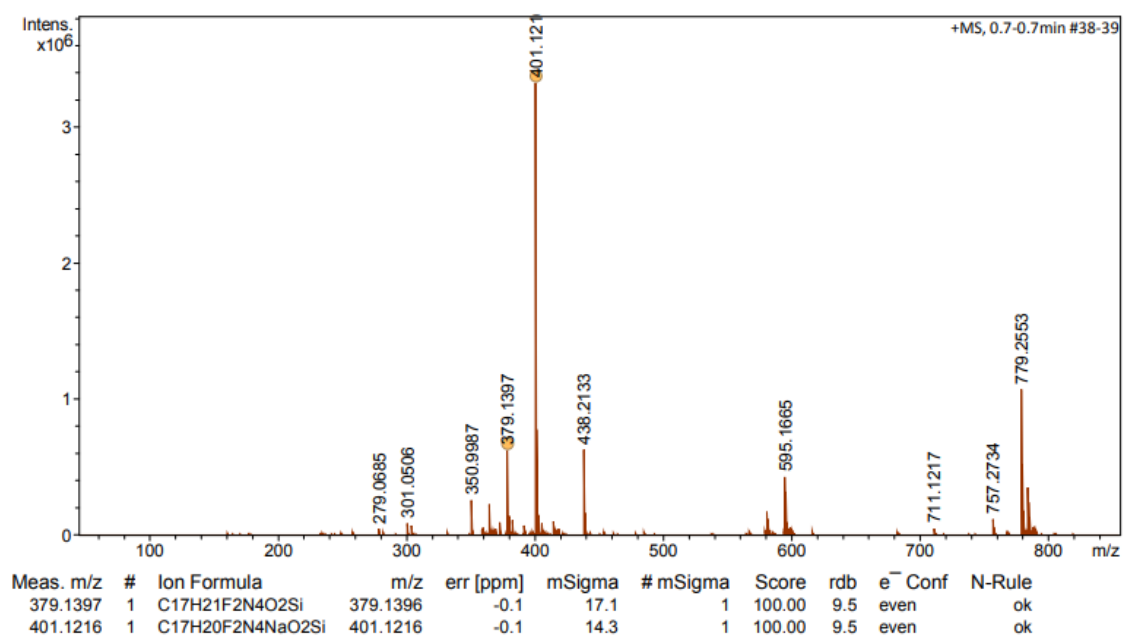

**S39:** NMR data of compound **8** in DMSO-*d*<sub>6</sub><sup>a</sup>

| Position | δ <sub>H</sub> , mult. ( <i>J</i> in Hz) | δ <sub>C</sub> | COSY | HMBC       |
|----------|------------------------------------------|----------------|------|------------|
| 3        |                                          | 147.2          |      |            |
| 5        |                                          | 119.8          |      |            |
| 6        | 7.92, s, 1H                              | 128.5          |      | 5, 8       |
| 8        |                                          | 151.5          |      |            |
| 9        |                                          | 146.7          |      |            |
| 10       |                                          | 126.3          |      |            |
| 11       | 7.74, m, 1H                              | 133.1          | 12   | 3, 13,15   |
| 12       | 7.63, m, 1H                              | 127.9          | 11   | 10,14      |
| 13       |                                          | 135.4          |      |            |
| 14       | 7.63, m, 1H                              | 127.9          | 15   | 10, 12     |
| 15       | 7.74, m, 1H                              | 133.1          | 14   | 3, 11, 13  |
| 18       | 2.86, s, 3H                              | 20.2           |      | 5, 6, 8, 9 |

<sup>a</sup> Recorded at 500 MHz (<sup>1</sup>H NMR) and 125 MHz (<sup>13</sup>C NMR) at 25 °C.

**S40:** <sup>1</sup>H NMR spectrum of compound **8** in DMSO-*d*<sub>6</sub>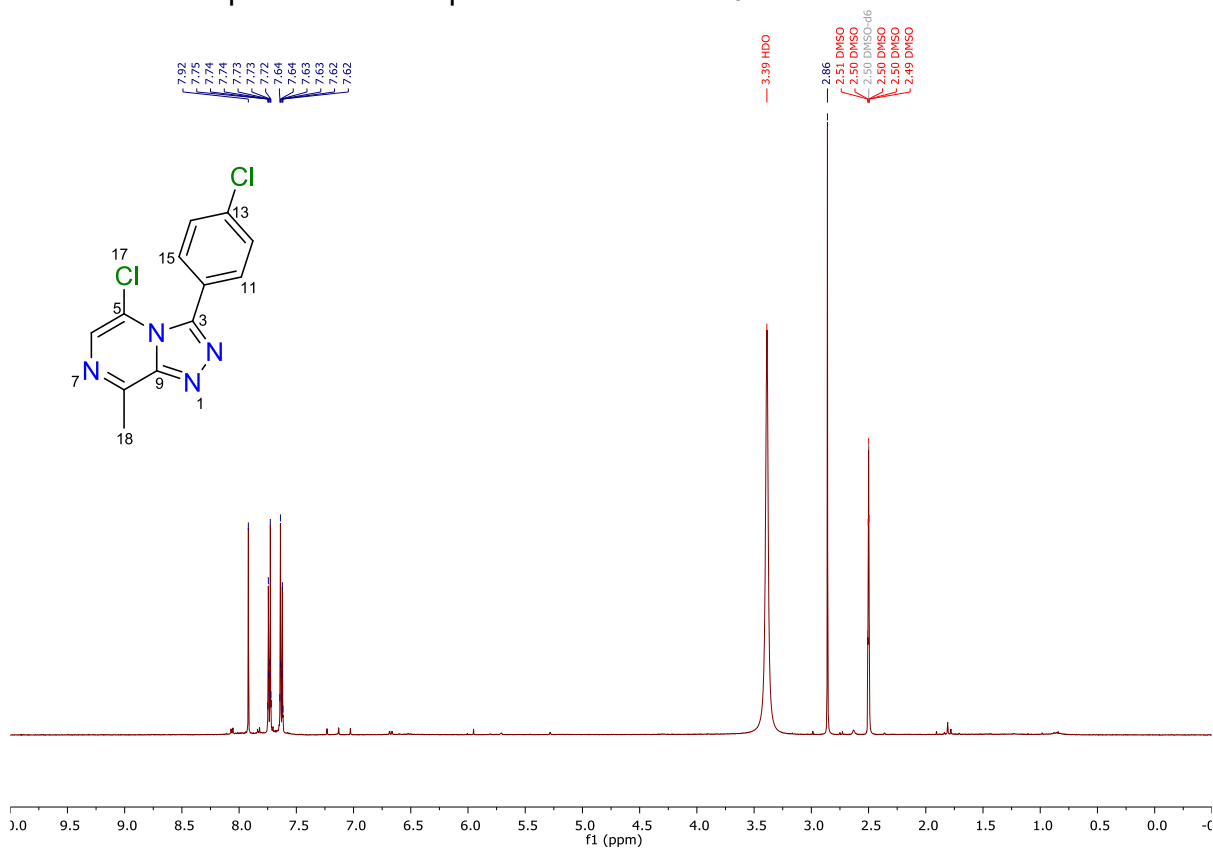

**S41:**  $^{13}\text{C}$  NMR spectrum of compound **8** in  $\text{DMSO}-d_6$

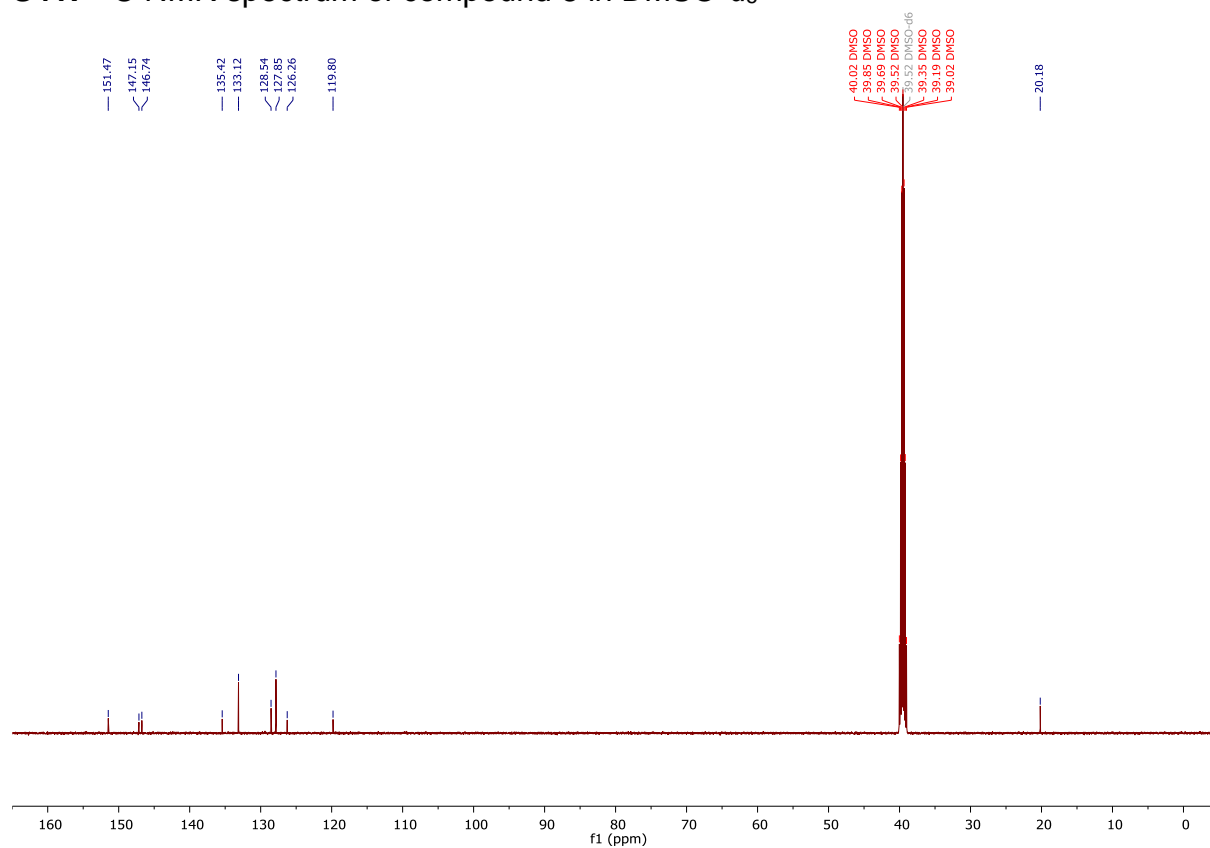

**S42:** COSY spectrum of compound **8** in  $\text{DMSO}-d_6$

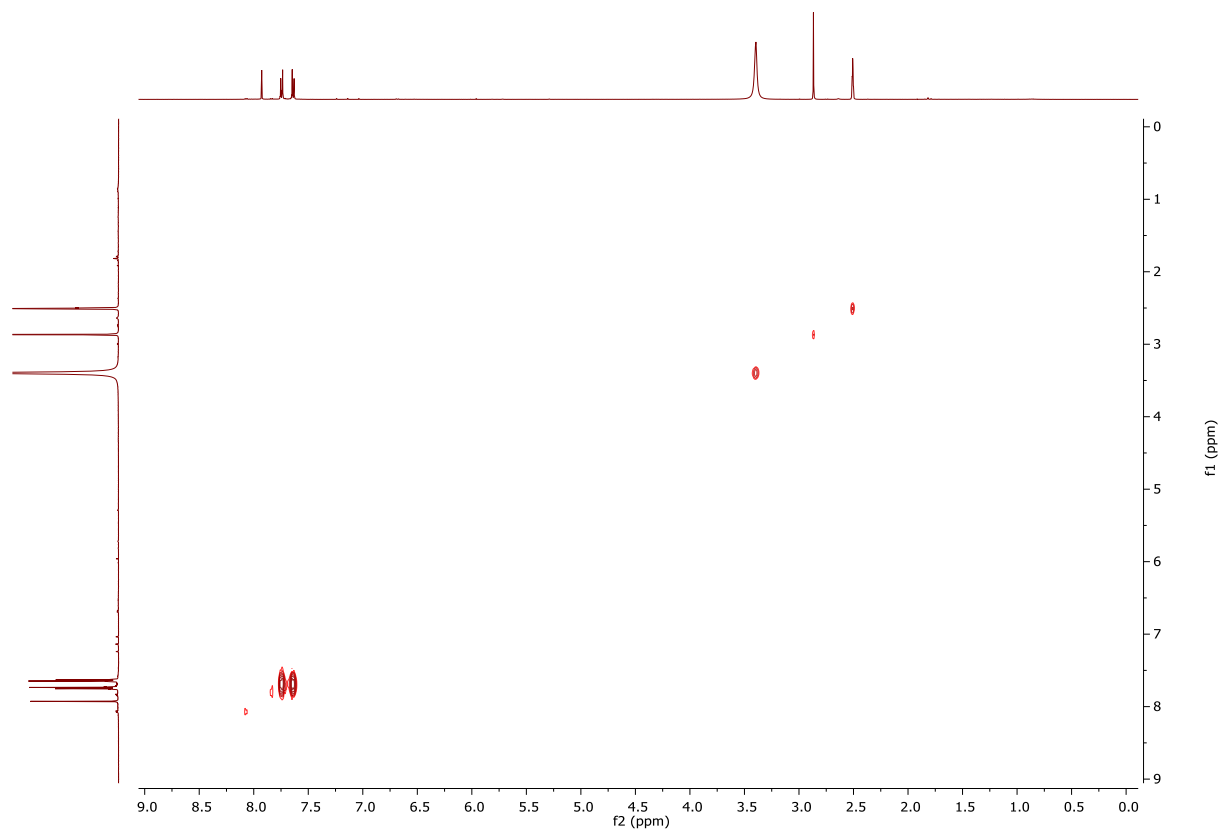

**S43:** HSQC spectrum of compound **8** in DMSO- $d_6$

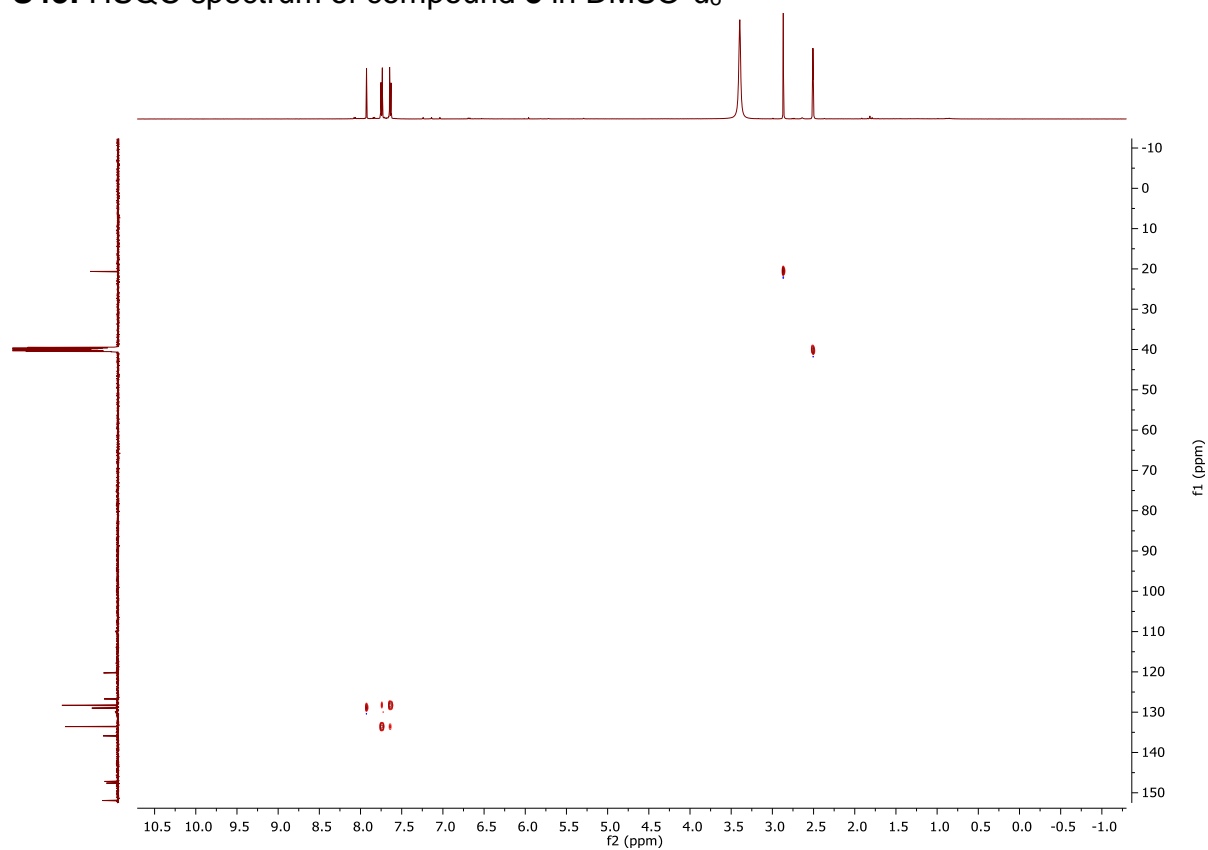

**S44:** HMBC spectrum of compound **8** in DMSO- $d_6$

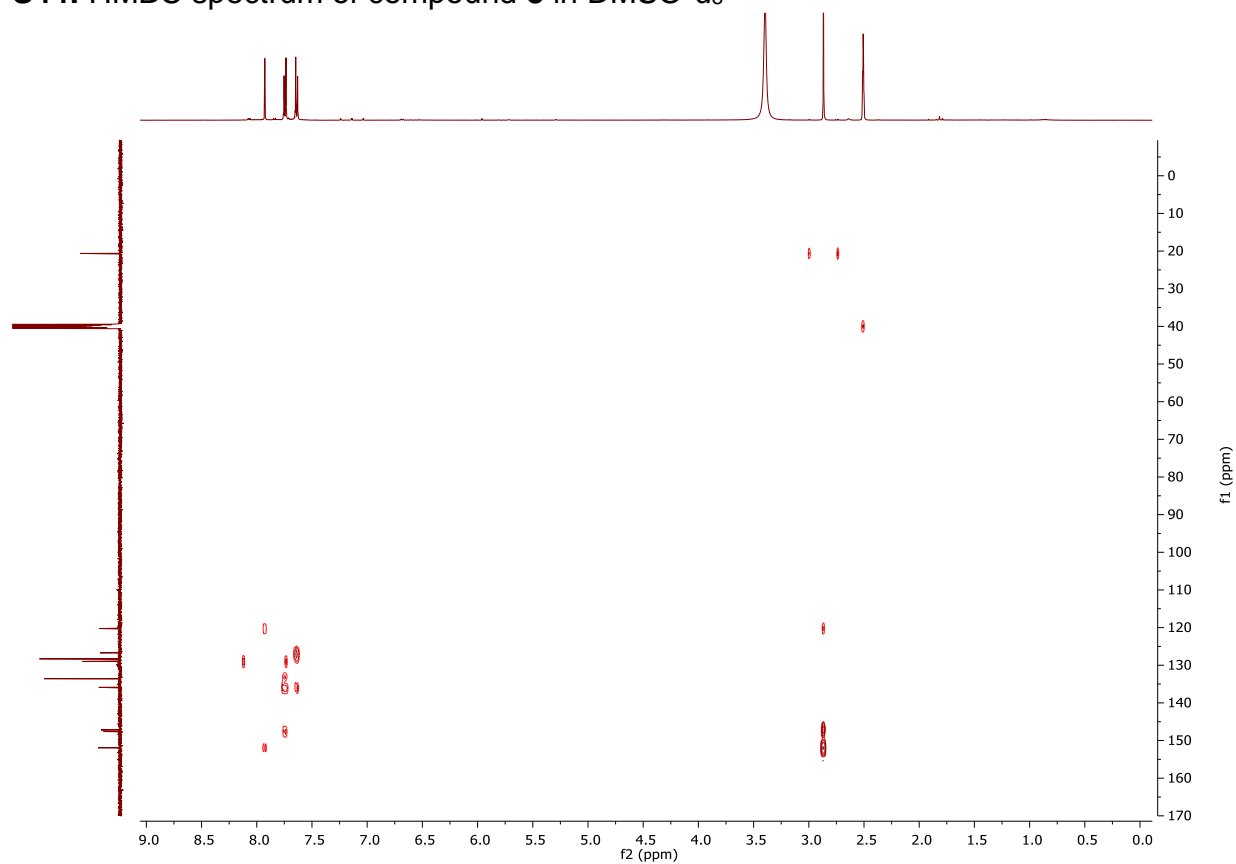

## S45: HRMS of compound 8

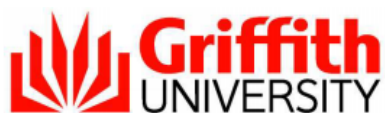

### High Resolution Mass Spectrum

#### Analysis Info

Analysis Name D:\Data\KahYean\20200508\RAD857000003.d  
Method DirectInfusion\_2018\_pos.m  
Sample Name RAD857  
Comment

Acquisition Date 5/12/2020 11:00:21 AM  
Instrument maXis II ETD 1823391.22321

#### +MS, 0.1min #6

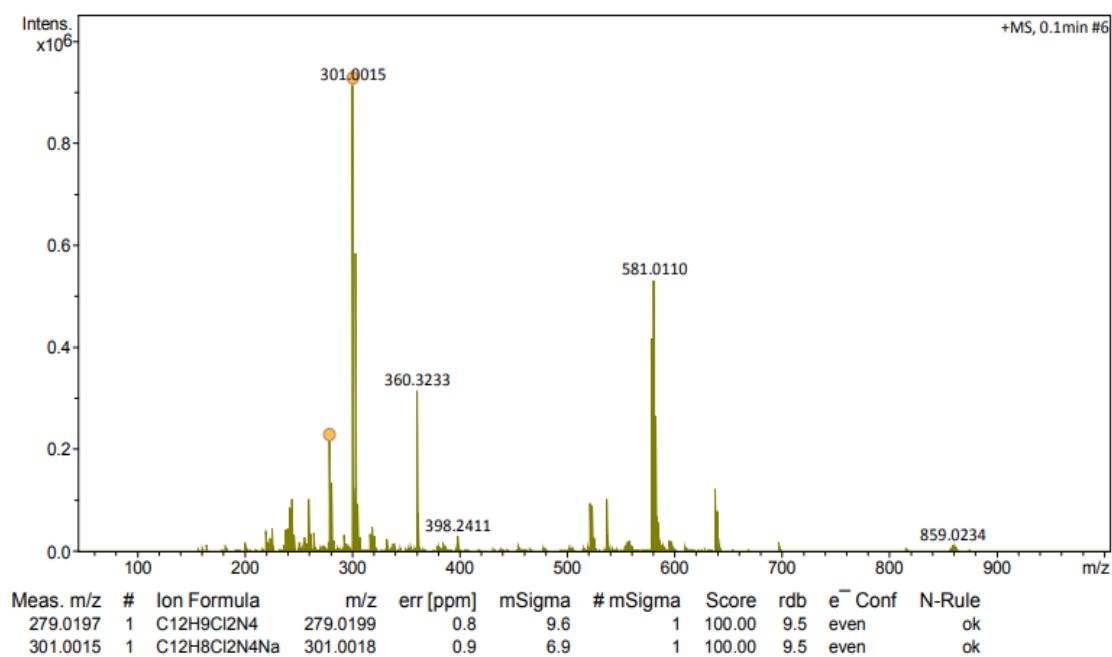



**S46:** NMR data of compound **10** in DMSO-*d*<sub>6</sub><sup>a</sup>

| Position | δ <sub>H</sub> , mult. ( <i>J</i> in Hz) | δ <sub>C</sub>      | COSY | HMBC       |
|----------|------------------------------------------|---------------------|------|------------|
| 3        |                                          | 146.76 <sup>#</sup> |      |            |
| 5        |                                          | 119.8               |      |            |
| 6        | 7.96, s, 1H                              | 128.7               |      | 5, 8       |
| 8        |                                          | 151.5               |      |            |
| 9        |                                          | 146.83 <sup>#</sup> |      |            |
| 10       |                                          | 132.0               |      |            |
| 11       | 7.93, m, 1H                              | 132.2               | 12   | 3, 13, 15  |
| 12       | 8.04, m, 1H                              | 131.6               | 11   | 10, 14, 16 |
| 13       |                                          | 113.0               |      |            |
| 14       | 8.04, m, 1H                              | 131.6               | 15   | 10, 12, 16 |
| 15       | 7.93, m, 1H                              | 132.2               | 14   | 3, 11, 13  |
| 16       |                                          | 118.4               |      |            |
| 19       | 2.87, s, 3H                              | 20.2                |      | 5, 6, 8, 9 |

<sup>a</sup> Recorded at 500 MHz (<sup>1</sup>H NMR) and 125 MHz (<sup>13</sup>C NMR) at 25 °C. <sup>#</sup> Interchangeable signals.

**S47:** <sup>1</sup>H NMR spectrum of compound **10** in DMSO-*d*<sub>6</sub>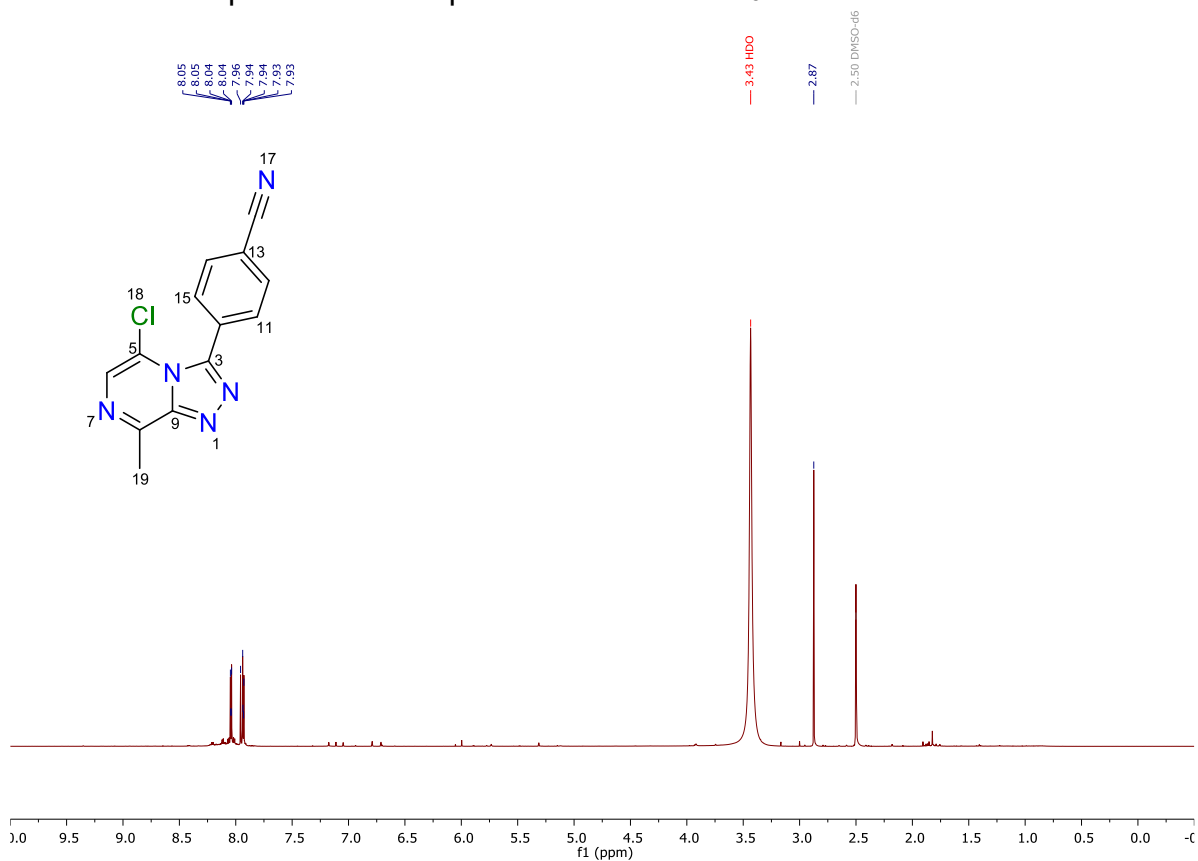

**S48:**  $^{13}\text{C}$  NMR spectrum of compound **10** in  $\text{DMSO}-d_6$

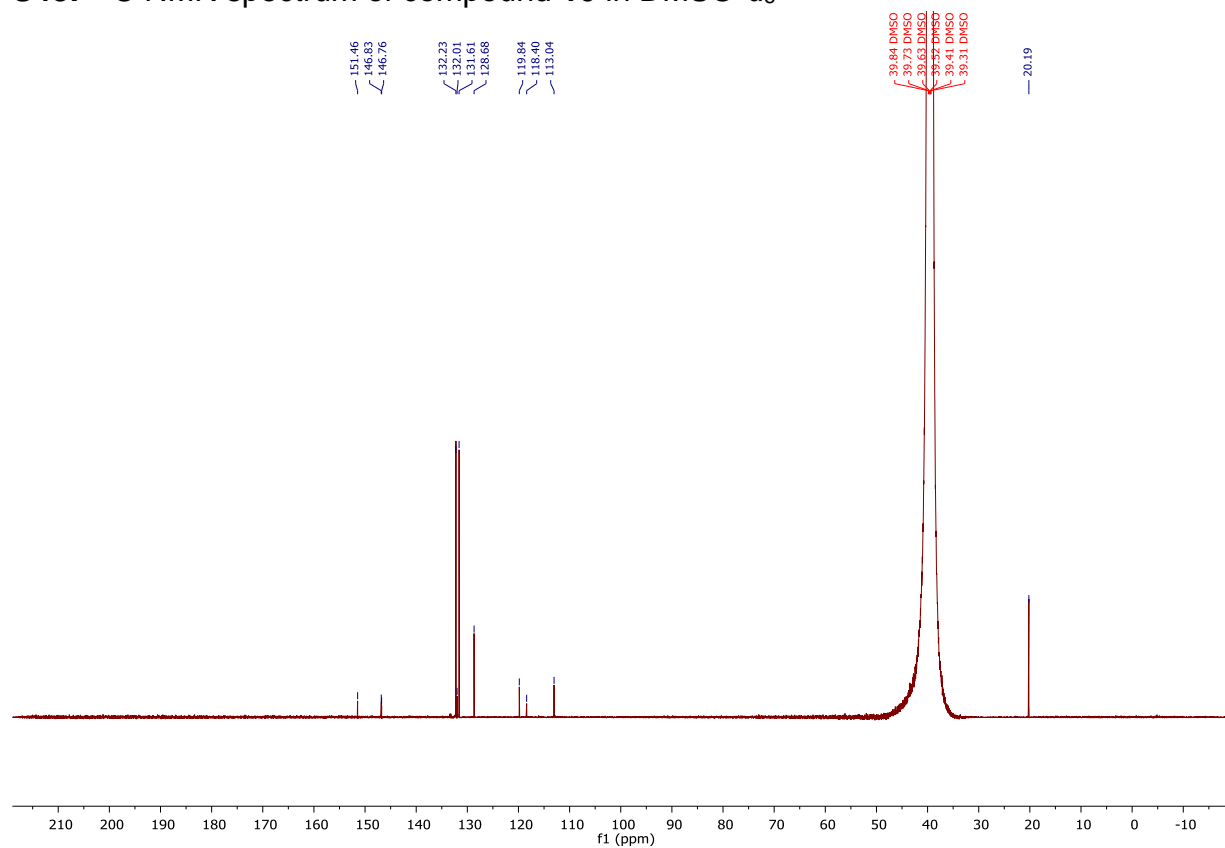

**S49:** COSY spectrum of compound **10** in  $\text{DMSO}-d_6$

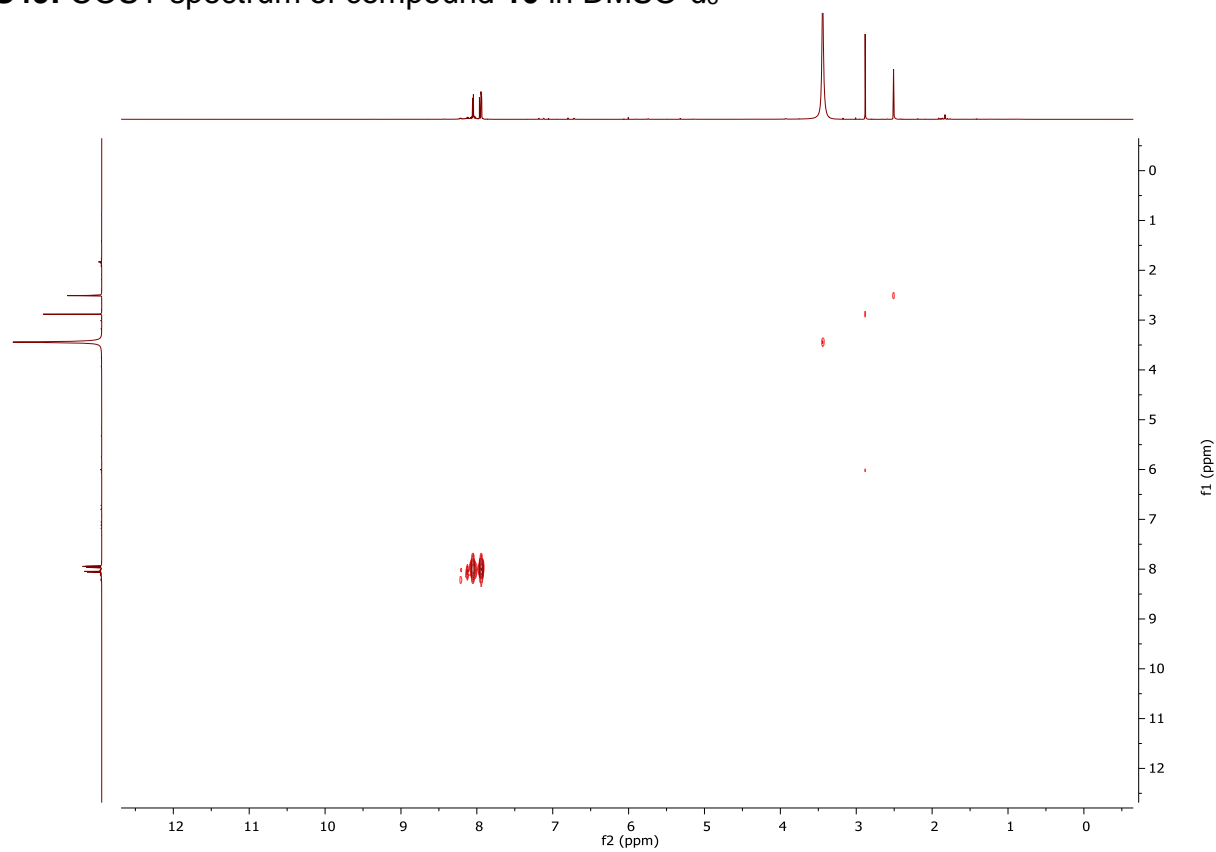

**S50:** HSQC spectrum of compound **10** in DMSO- $d_6$

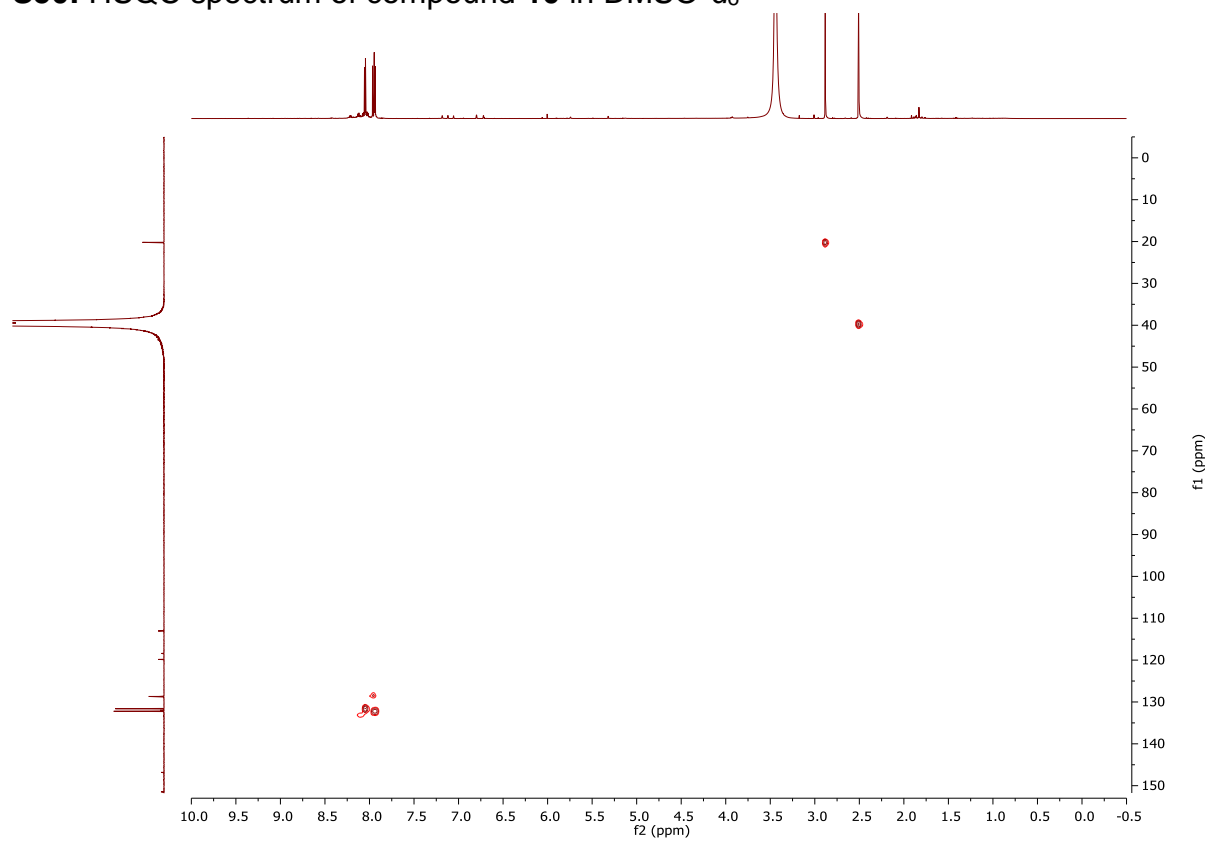

**S51:** HMBC spectrum of compound **10** in DMSO- $d_6$

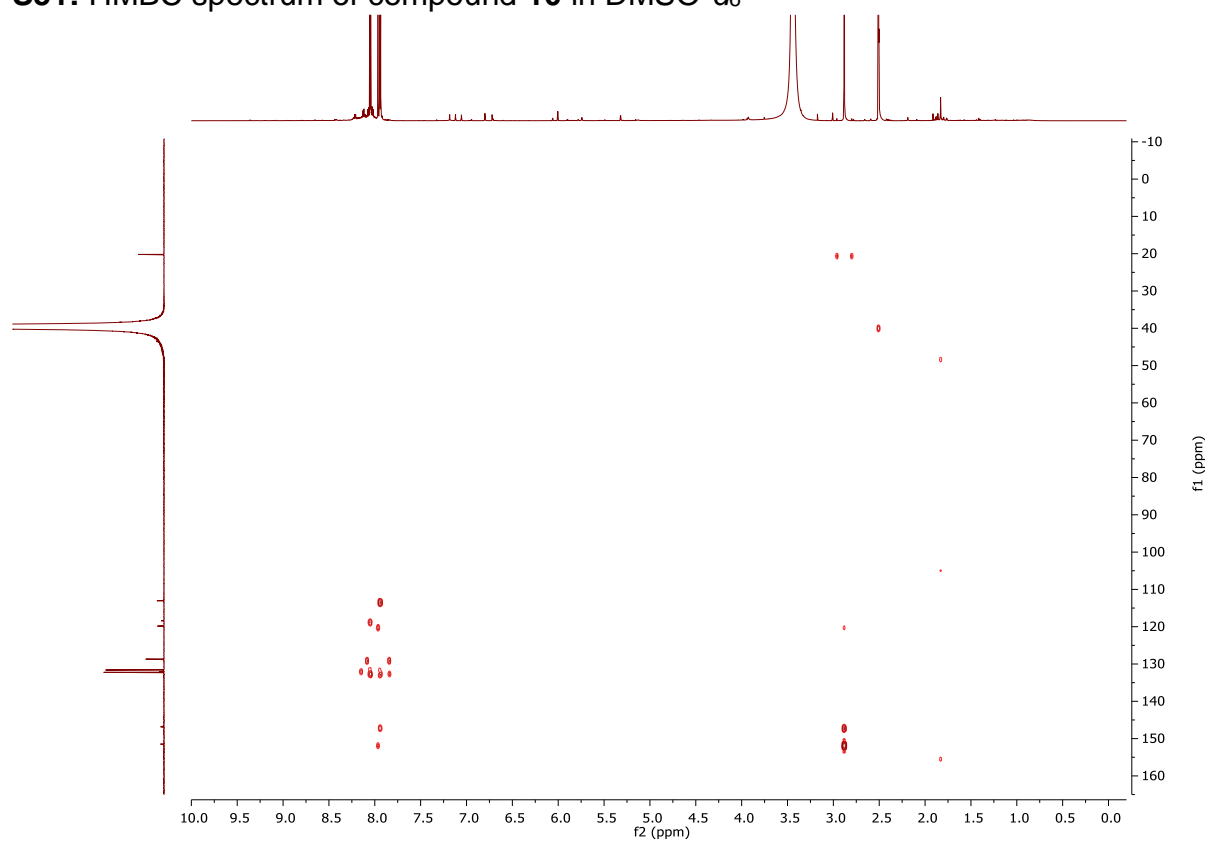

## S52: HRMS of compound 10

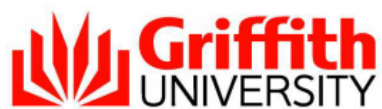

### High Resolution Mass Spectrum

#### Analysis Info

Analysis Name D:\Data\KahYean\20200508\RAD858000001.d  
Method DirectInfusion\_2018\_pos.m  
Sample Name RAD858  
Comment

Acquisition Date 5/12/2020 11:09:33 AM  
Instrument maXis II ETD 1823391.22321

#### +MS, 0.1-0.1min #5-6

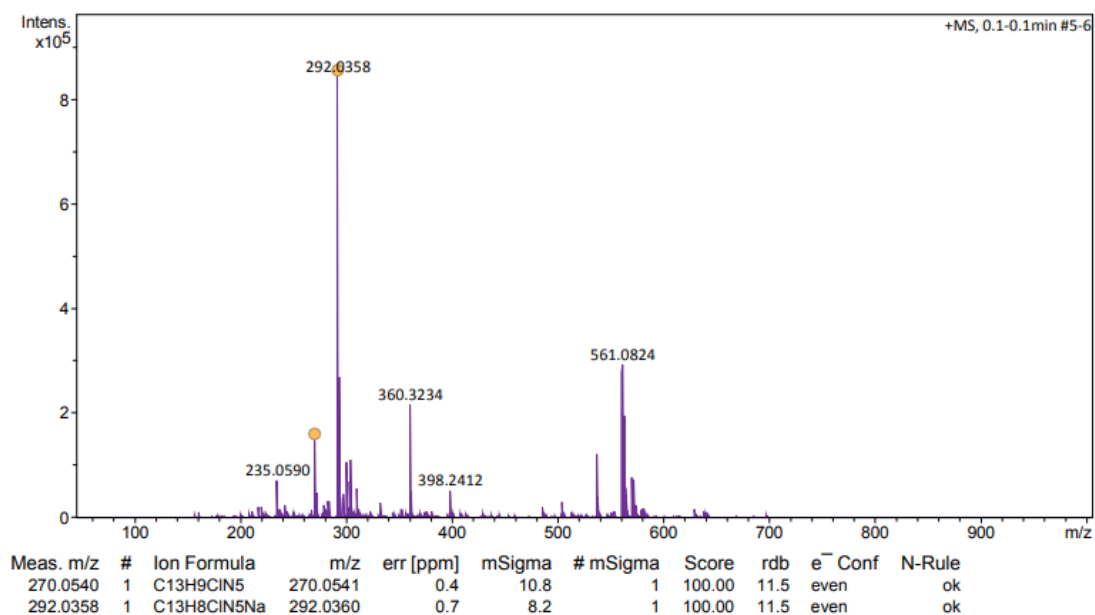

**S53:** NMR data of compound **11** in DMSO-*d*<sub>6</sub><sup>a</sup>

| Pos | δ <sub>H</sub> , mult. ( <i>J</i> in Hz), int. | δ <sub>C</sub> , mult. ( <i>J</i> in Hz) | COSY | HMBC       |
|-----|------------------------------------------------|------------------------------------------|------|------------|
| 3   |                                                | 147.4, s                                 |      |            |
| 5   |                                                | 119.8, s                                 |      |            |
| 6   | 7.91, s, 1H                                    | 128.5, s                                 |      | 5, 8       |
| 8   |                                                | 151.5, s                                 |      |            |
| 9   |                                                | 146.7, s                                 |      |            |
| 10  |                                                | 124.0, s                                 |      |            |
| 11  | 7.77, m, 1H                                    | 133.3, s                                 | 12   | 3, 13, 15  |
| 12  | 7.34, m, 1H                                    | 117.5, s                                 | 11   | 10, 14     |
| 13  |                                                | 152.5, t (3.3)                           |      |            |
| 14  | 7.34, m, 1H                                    | 117.5, s                                 | 15   | 10, 12     |
| 15  | 7.77, m, 1H                                    | 133.3, s                                 | 14   | 3, 11, 13  |
| 17  | 7.40, t (73.7), 1H                             | 116.2, t (258.5)                         |      | 13         |
| 21  | 2.86, s, 3H                                    | 20.2, s                                  |      | 5, 6, 8, 9 |

<sup>a</sup> Recorded at 500 MHz (<sup>1</sup>H NMR) and 125 MHz (<sup>13</sup>C NMR) at 25 °C.**S54:** <sup>1</sup>H NMR spectrum of compound **11** in DMSO-*d*<sub>6</sub>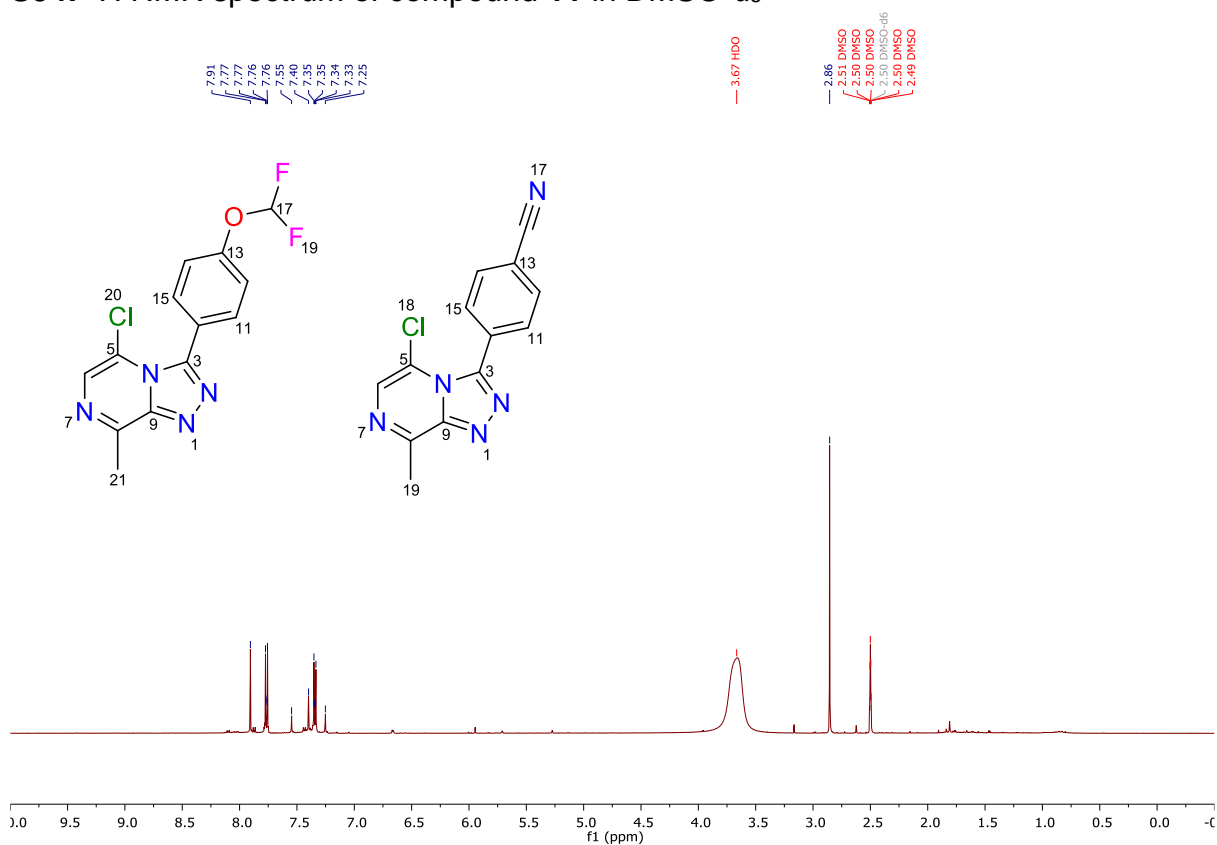

**S55:**  $^{13}\text{C}$  NMR spectrum of compound **11** in  $\text{DMSO}-d_6$

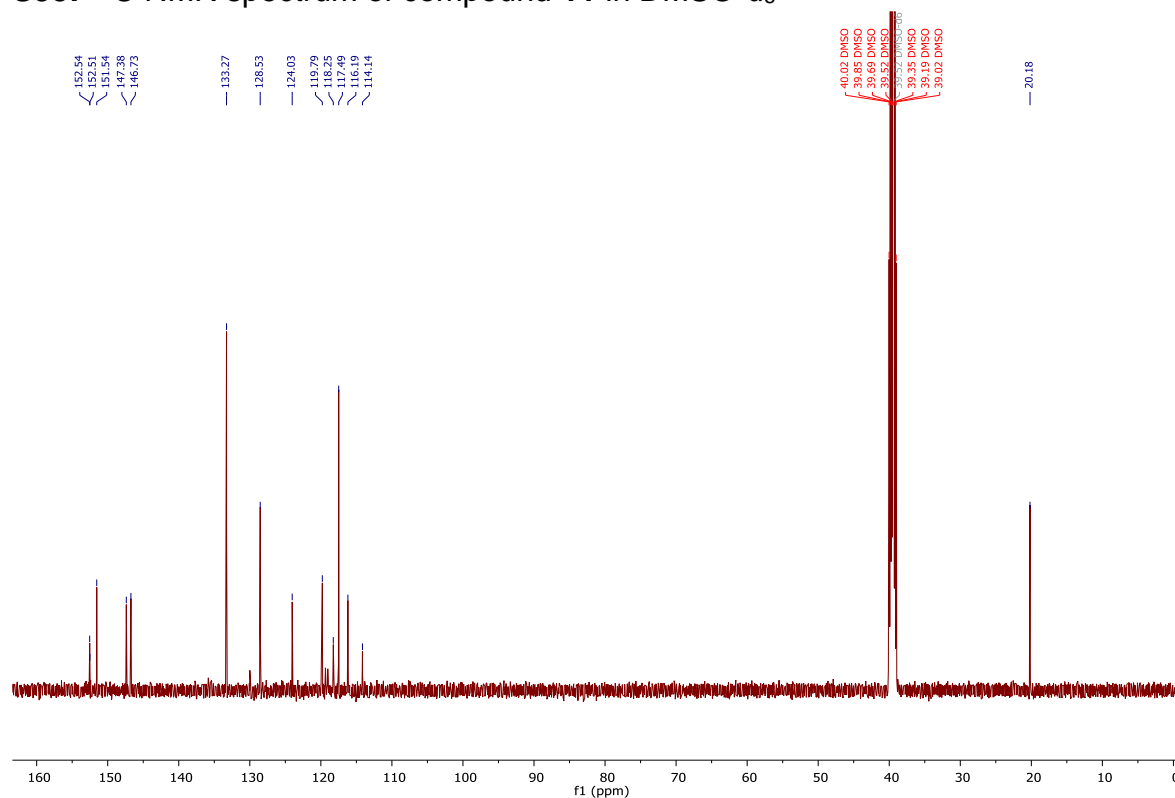

**S56:** COSY spectrum of compound **11** in  $\text{DMSO}-d_6$

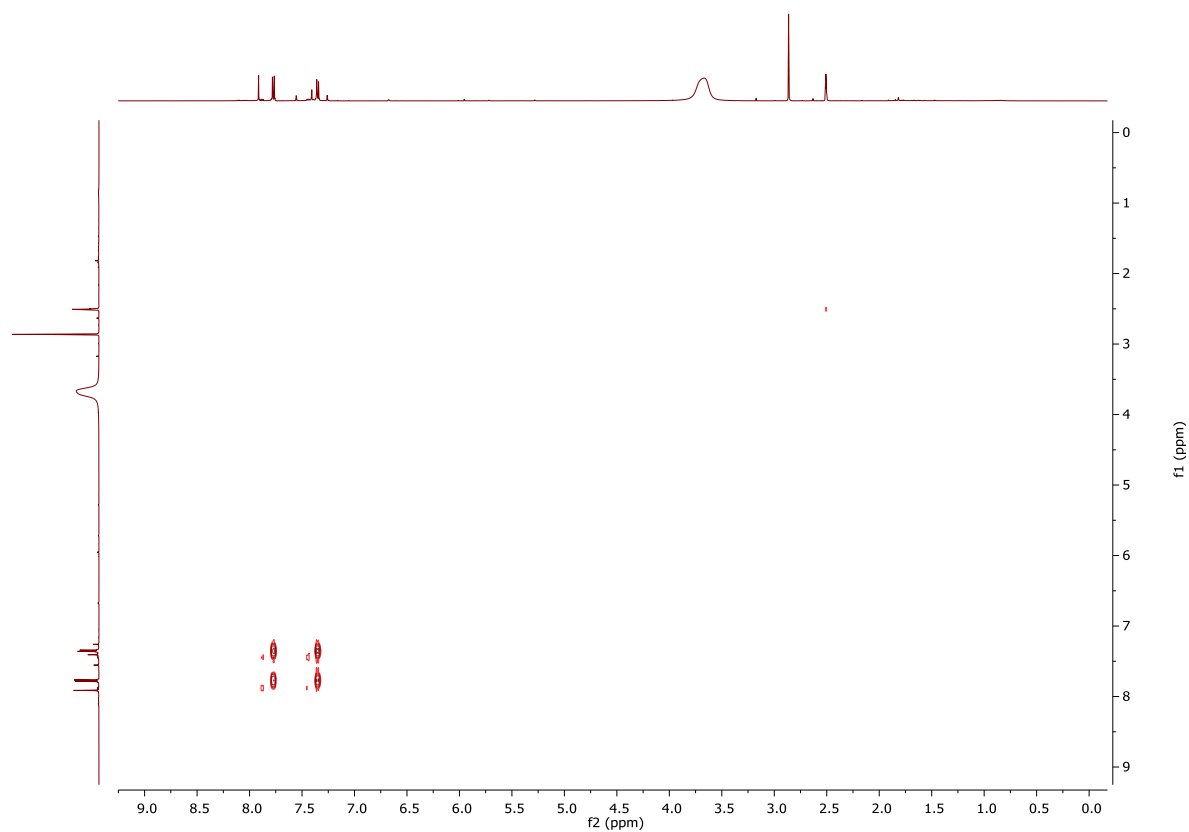

**S57:** HSQC spectrum of compound **11** in DMSO- $d_6$

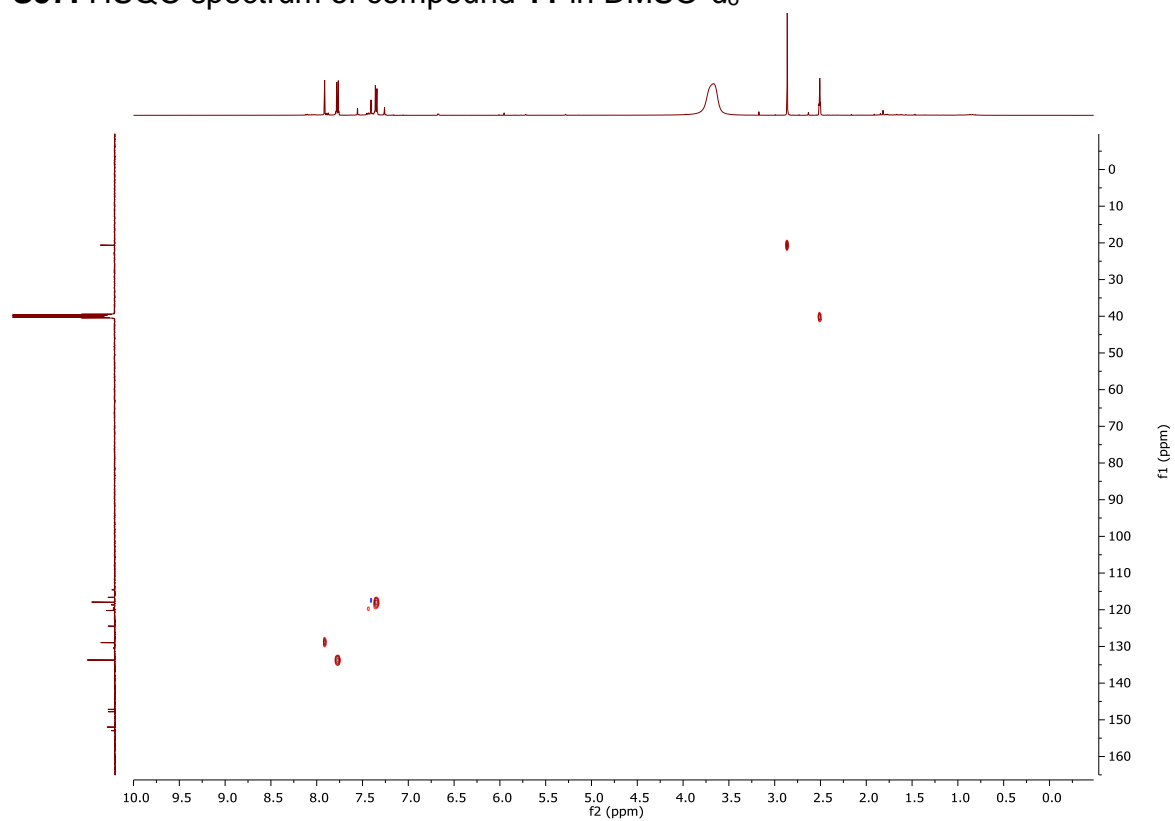

**S58:** HMBC spectrum of compound **11** in DMSO- $d_6$

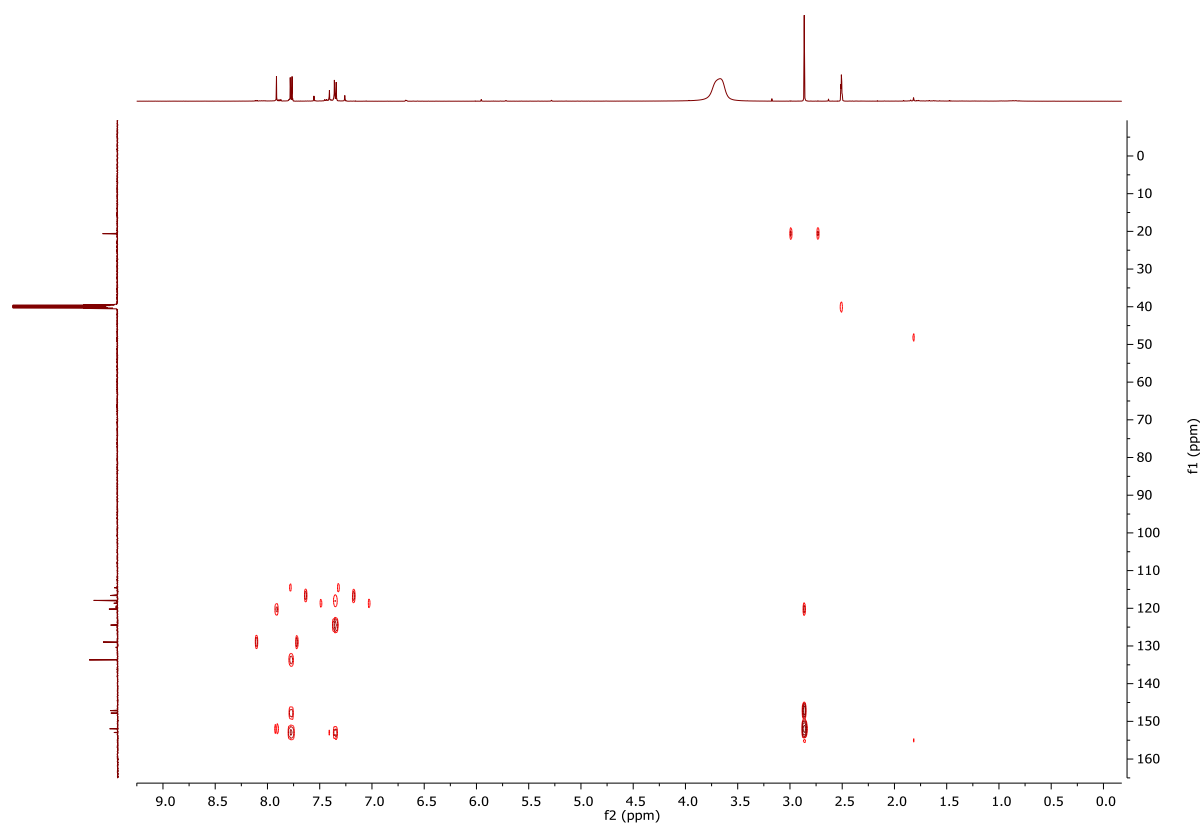

## S59: HRMS of compound 11

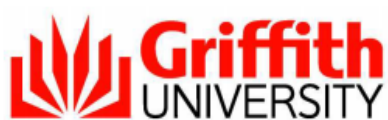

### High Resolution Mass Spectrum

#### Analysis Info

Analysis Name D:\Data\KahYean\20200508\RAD859000001.d  
Method DirectInfusion\_2018\_pos.m  
Sample Name RAD859  
Comment

Acquisition Date 5/12/2020 11:16:52 AM  
Instrument maXis II ETD 1823391.22321

#### +MS, 0.1min #4

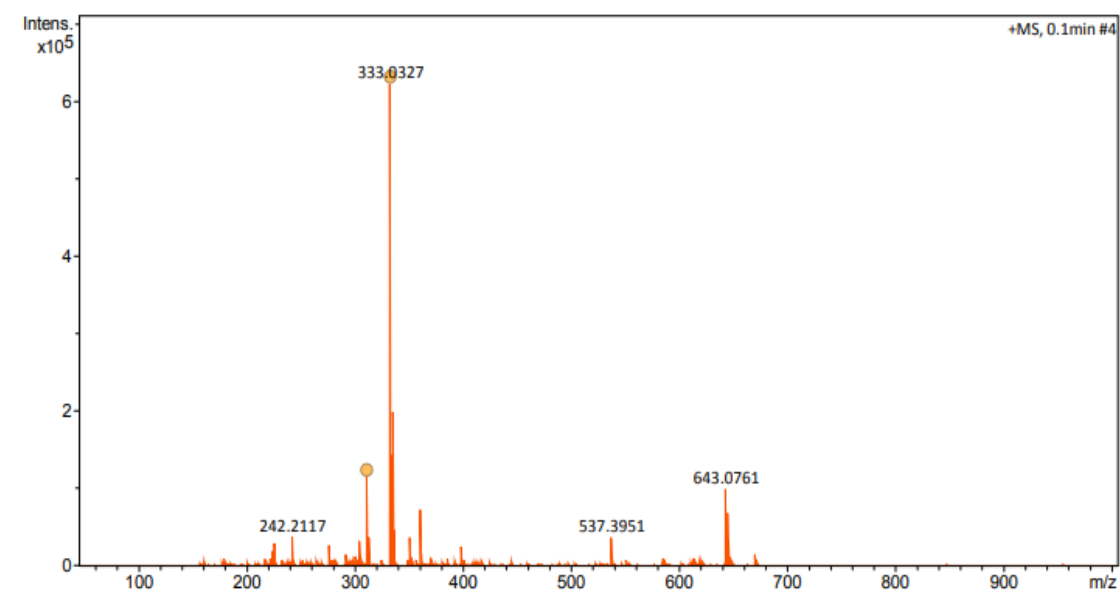

| Meas. m/z | # | Ion Formula                                                        | m/z      | err [ppm] | mSigma | # mSigma | Score  | rdb | e <sup>-</sup> Conf | N-Rule |
|-----------|---|--------------------------------------------------------------------|----------|-----------|--------|----------|--------|-----|---------------------|--------|
| 311.0508  | 1 | C <sub>13</sub> H <sub>10</sub> ClF <sub>2</sub> N <sub>4</sub> O  | 311.0506 | -0.7      | 40.9   | 1        | 100.00 | 9.5 | even                | ok     |
| 333.0327  | 1 | C <sub>13</sub> H <sub>9</sub> ClF <sub>2</sub> N <sub>4</sub> NaO | 333.0325 | -0.7      | 39.6   | 1        | 100.00 | 9.5 | even                | ok     |



**S60:** NMR data of compound **12** in DMSO-*d*<sub>6</sub><sup>a</sup>

| Pos. | δ <sub>H</sub> , mult. ( <i>J</i> in Hz), int. | δ <sub>C</sub> , mult. ( <i>J</i> in Hz) | COSY | HMBC      | ROESY |
|------|------------------------------------------------|------------------------------------------|------|-----------|-------|
| 3    |                                                | 146.8, s                                 |      |           |       |
| 5    |                                                | 141.6, s                                 |      |           |       |
| 6    | 7.52, s, 1H                                    | 108.9, s                                 |      | 5, 8      | 21    |
| 8    |                                                | 145.1, s                                 |      |           |       |
| 9    |                                                | 146.4, s                                 |      |           |       |
| 10   |                                                | 124.4, s                                 |      |           |       |
| 11   | 7.76, m, 1H                                    | 132.4, s                                 | 12   | 3, 13,15  | 12    |
| 12   | 7.28, m, 1H                                    | 117.7, s                                 | 11   | 10,14     | 11    |
| 13   |                                                | 152.0, t (3.2)                           |      |           |       |
| 14   | 7.28, m, 1H                                    | 117.7, s                                 | 15   | 10, 12    | 15    |
| 15   | 7.76, m, 1H                                    | 132.4, s                                 | 14   | 3, 11, 13 | 14    |
| 17   | 7.35, t (73.7), 1H                             | 116.1, t (258.5)                         |      | 13        |       |
| 21   | 4.96, q (8.5), 2H                              | 66.0, q (35.8)                           |      | 5, 22     | 6     |
| 22   |                                                | 122.5, q (277.3)                         |      |           |       |
| 26   | 2.78, s                                        | 19.8, s                                  |      | 8, 9      |       |

<sup>a</sup> Recorded at 500 MHz (<sup>1</sup>H NMR) and 125 MHz (<sup>13</sup>C NMR) at 25 °C.**S61:** <sup>1</sup>H NMR spectrum of compound **12** in DMSO-*d*<sub>6</sub>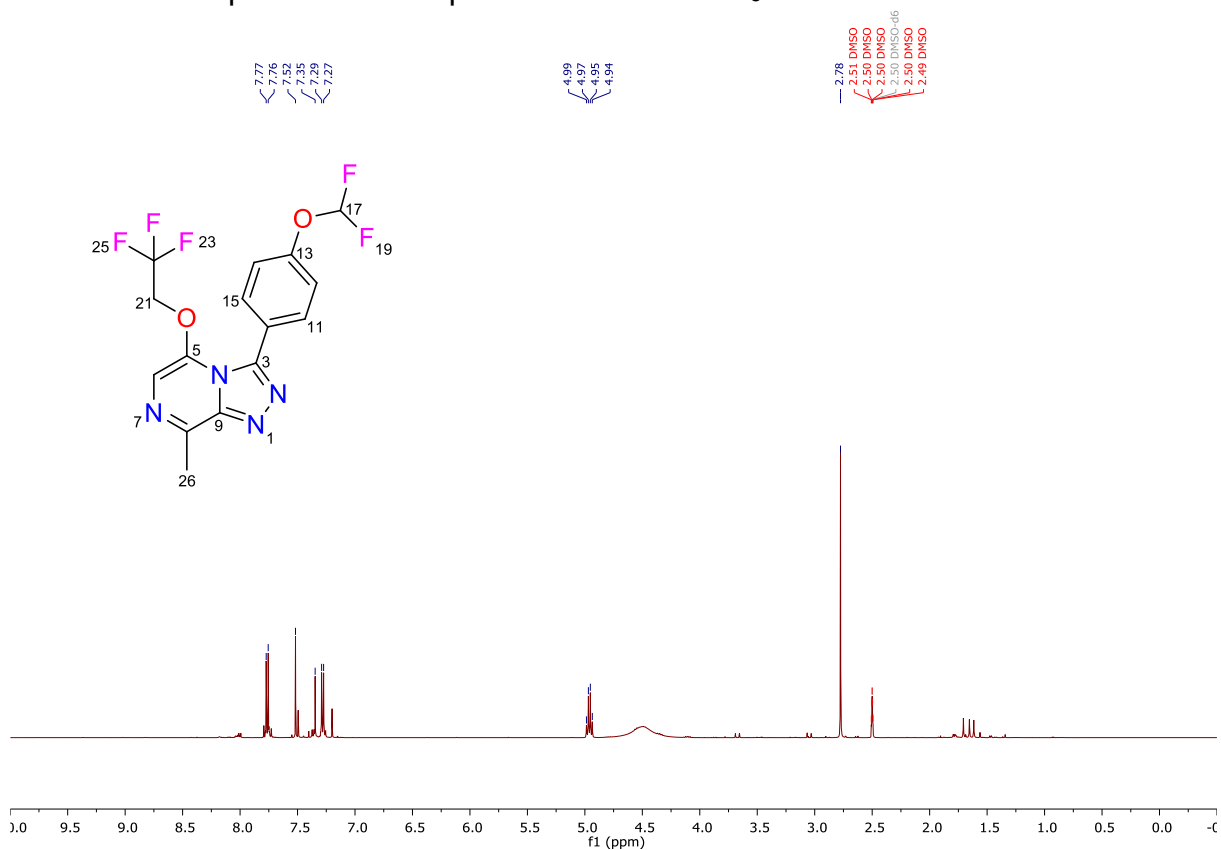

**S62:**  $^{13}\text{C}$  NMR spectrum of compound **12** in  $\text{DMSO}-d_6$

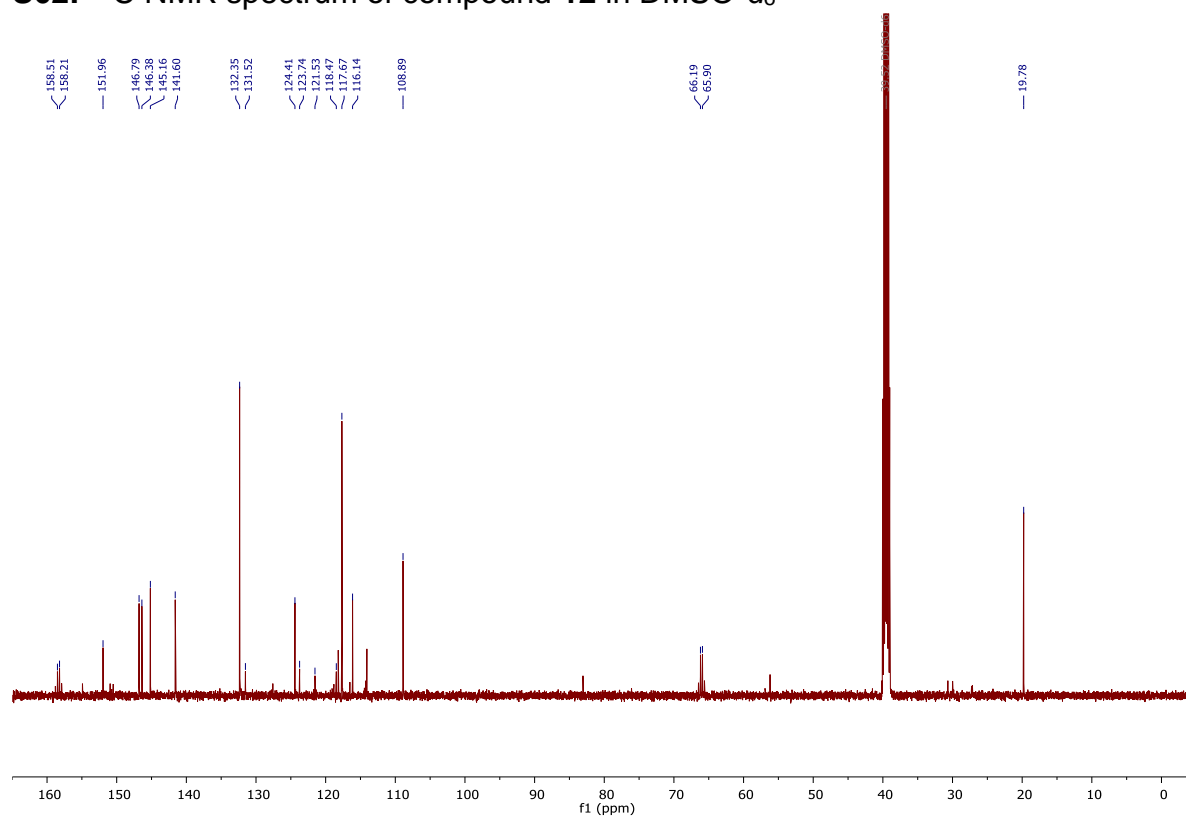

**S63:** COSY spectrum of compound **12** in  $\text{DMSO}-d_6$

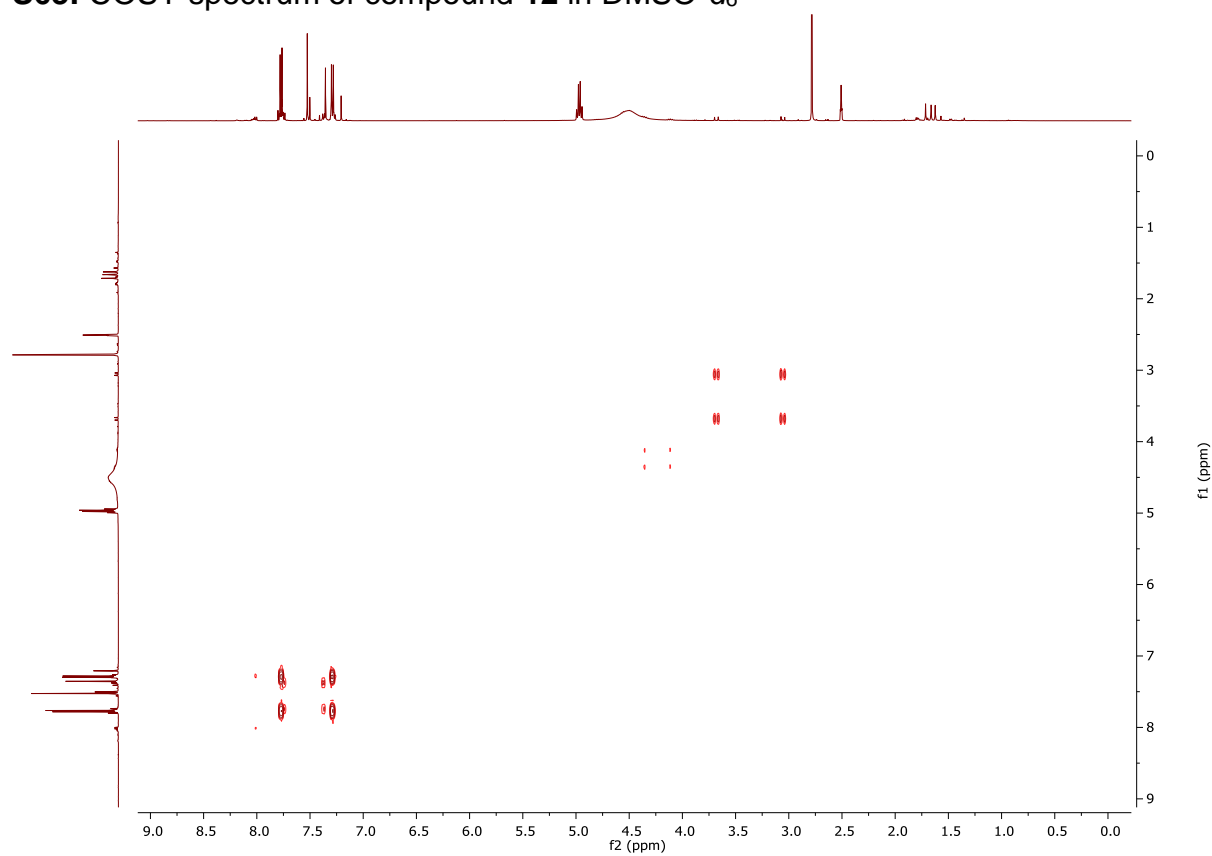

**S64:** HSQC spectrum of compound **12** in DMSO- $d_6$

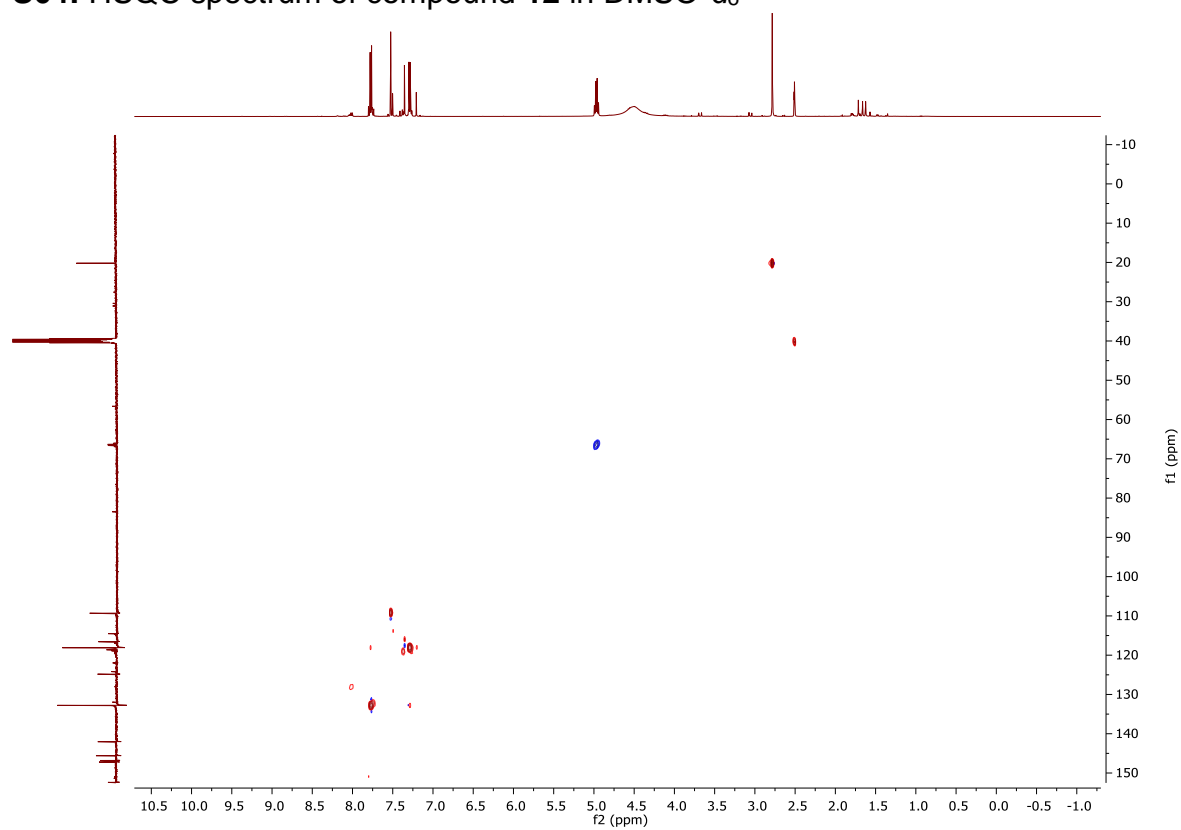

**S65:** HMBC spectrum of compound **12** in DMSO- $d_6$

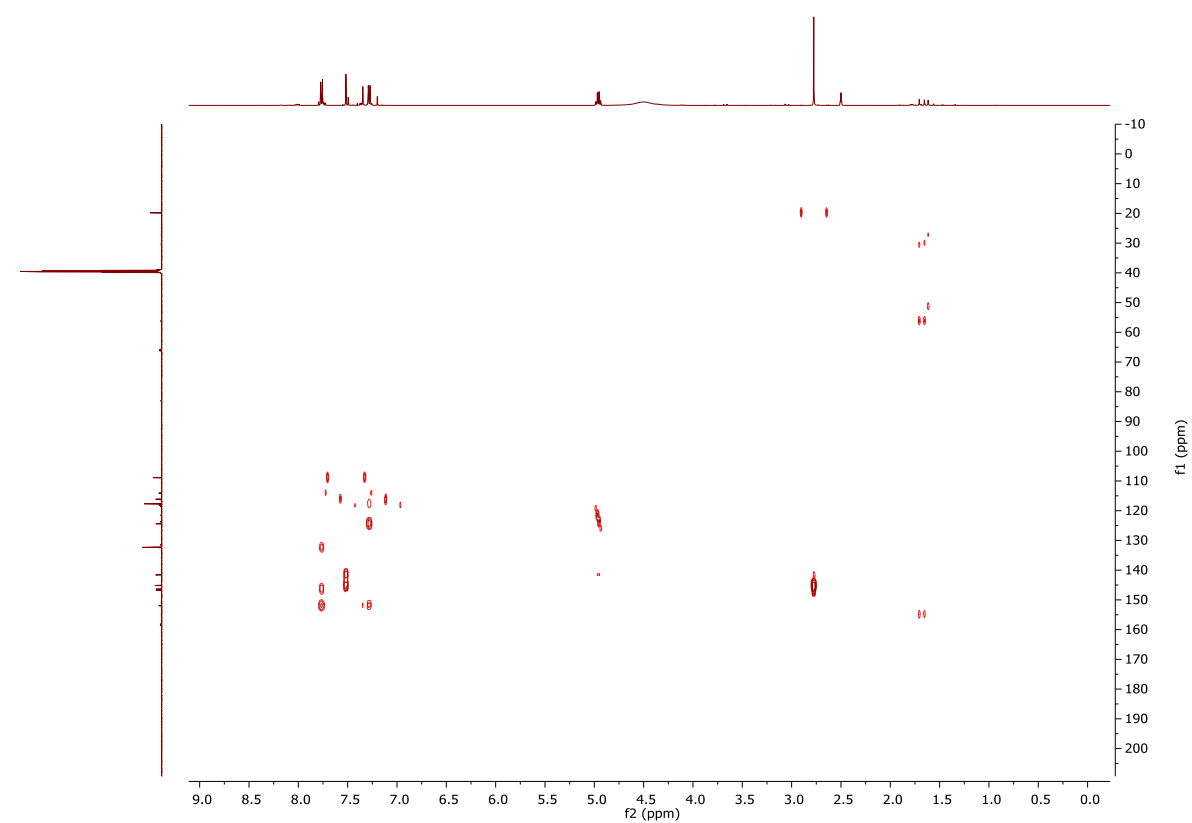

**S66: ROESY spectrum of compound 12 in DMSO- $d_6$**

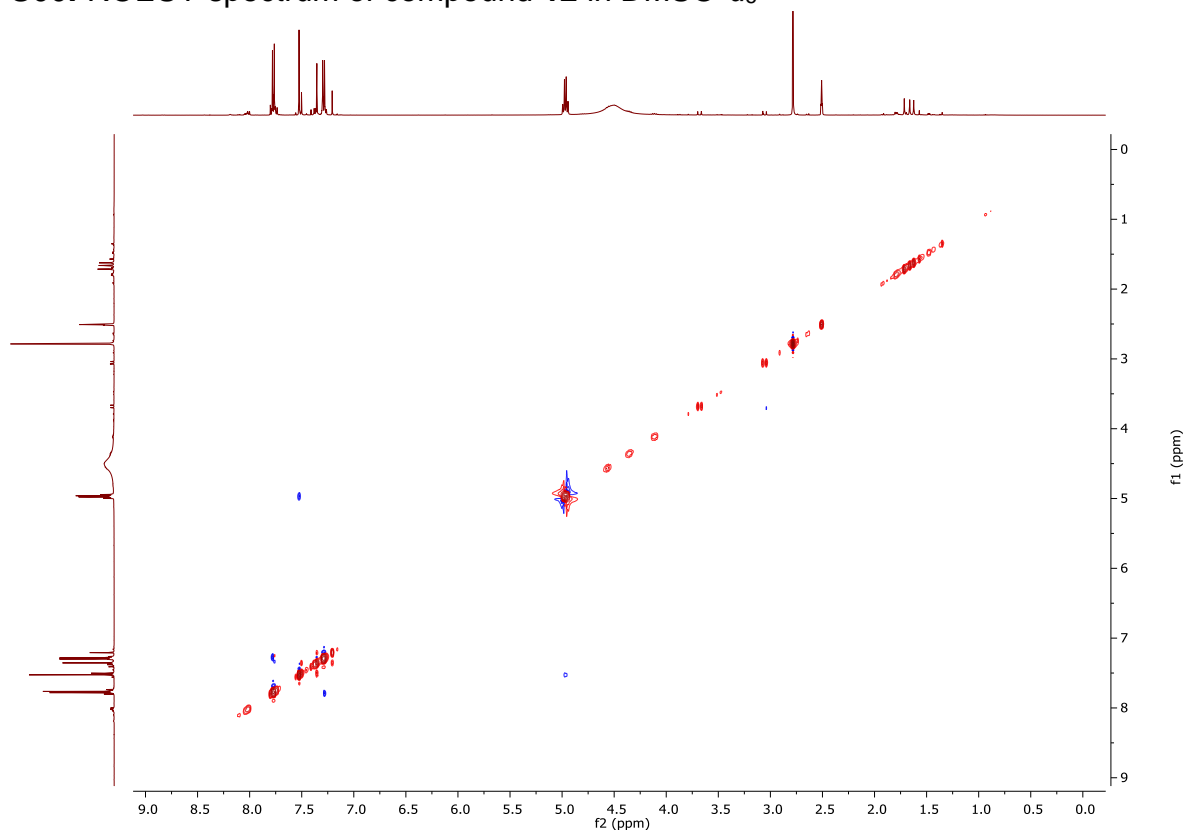

**S67: HRMS of compound 12**

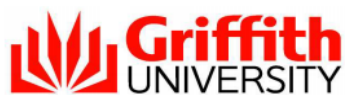

**High Resolution Mass Spectrum**

**Analysis Info**

Analysis Name D:\Data\KahYean\20200904\RAD866000001.d  
 Method DirectInfusion\_2018\_pos.m  
 Sample Name RAD866  
 Comment

Acquisition Date 9/4/2020 11:41:46 AM  
 Instrument maXis II ETD 1823391.22321

**+MS, 0.3min #18**

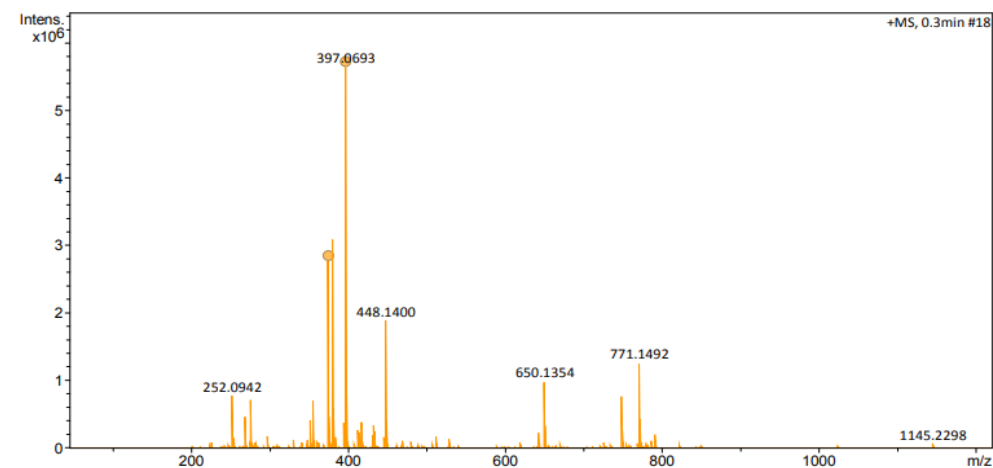

| Meas. m/z | # | Ion Formula    | m/z      | err [ppm] | mSigma | # mSigma | Score  | rdb | e <sup>-</sup> Conf | N-Rule |
|-----------|---|----------------|----------|-----------|--------|----------|--------|-----|---------------------|--------|
| 375.0874  | 1 | C15H12F5N4O2   | 375.0875 | 0.3       | 5.5    | 1        | 100.00 | 9.5 | even                | ok     |
| 397.0693  | 1 | C15H11F5N4NaO2 | 397.0694 | 0.4       | 5.0    | 1        | 100.00 | 9.5 | even                | ok     |

**S68:** NMR data for compound **13** in DMSO-*d*<sub>6</sub><sup>a</sup>

| Pos. | δ <sub>H</sub> , mult. ( <i>J</i> in Hz), int. | δ <sub>C</sub> , mult. ( <i>J</i> in Hz) | COSY   | HMBC           | ROESY  |
|------|------------------------------------------------|------------------------------------------|--------|----------------|--------|
| 3    |                                                | 146.3, s                                 |        |                |        |
| 5    |                                                | 142.8, s                                 |        |                |        |
| 6    | 7.39, s, 1H                                    | 107.9, s                                 |        | 5, 8           |        |
| 8    |                                                | 143.2, s                                 |        |                |        |
| 9    |                                                | 146.8, s                                 |        |                |        |
| 10   |                                                | 124.8, s                                 |        |                |        |
| 11   | 7.74, m, 1H                                    | 132.6, s                                 | 12     | 3, 13, 15      | 12     |
| 12   | 7.29, m, 1H                                    | 117.6, s                                 | 11     | 10,14          | 11     |
| 13   |                                                | 152.0, t (3.2)                           |        |                |        |
| 14   | 7.29, m, 1H                                    | 117.6, s                                 | 15     | 10, 12         | 15     |
| 15   | 7.74, m, 1H                                    | 132.6, s                                 | 14     | 3, 11, 13      | 14     |
| 17   | 7.36, t (73.7), 1H                             | 116.2, t (258.2)                         |        | 13             |        |
| 21   | 4.42, t (6.5), 2H                              | 71.0, s                                  | 22     | 5, 22, 23      | 6, 22  |
| 22   | 2.86, t (6.5), 2H                              | 33.9, s                                  | 21     | 21, 23, 24, 28 | 24, 28 |
| 23   |                                                | 137.4, s                                 |        |                |        |
| 24   | 6.90, m, 1H                                    | 128.7, s                                 | 25     | 22, 26, 28     | 25     |
| 25   | 7.17, m, 1H                                    | 128.2, s                                 | 24, 26 | 23, 27         | 24, 26 |
| 26   | 7.16, m, 1H                                    | 126.4, s                                 | 25, 27 | 24, 28         | 25, 27 |
| 27   | 7.17, m, 1H                                    | 128.2, s                                 | 26, 28 | 23, 25         | 26, 28 |
| 28   | 6.90, m, 1H                                    | 128.7, s                                 | 27     | 22, 24, 26     | 27     |
| 29   | 2.72, s, 3H                                    | 19.7, s                                  |        | 6, 8, 9        |        |

<sup>a</sup> Recorded at 500 MHz (<sup>1</sup>H NMR) and 125 MHz (<sup>13</sup>C NMR) at 25 °C.**S69:** <sup>1</sup>H NMR spectrum of compound **13** in DMSO-*d*<sub>6</sub>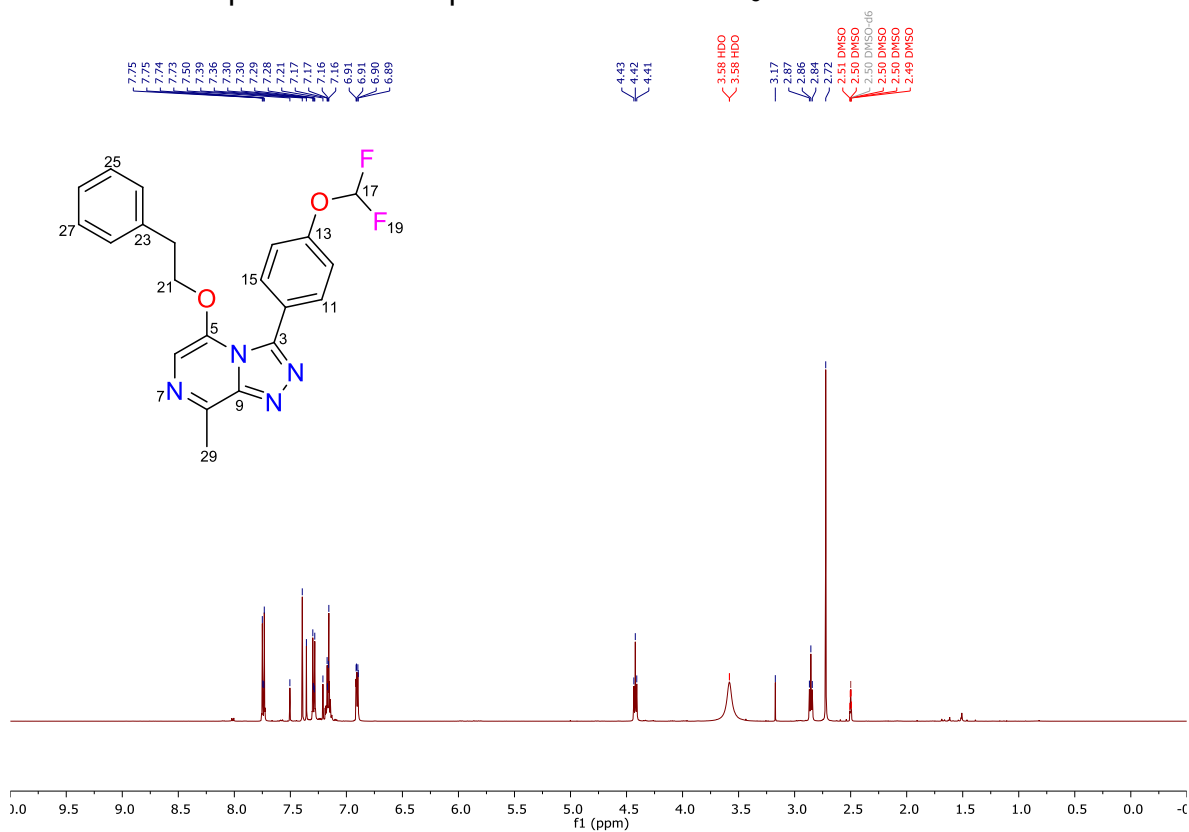

**S70:**  $^{13}\text{C}$  NMR spectrum of compound **13** in  $\text{DMSO}-d_6$

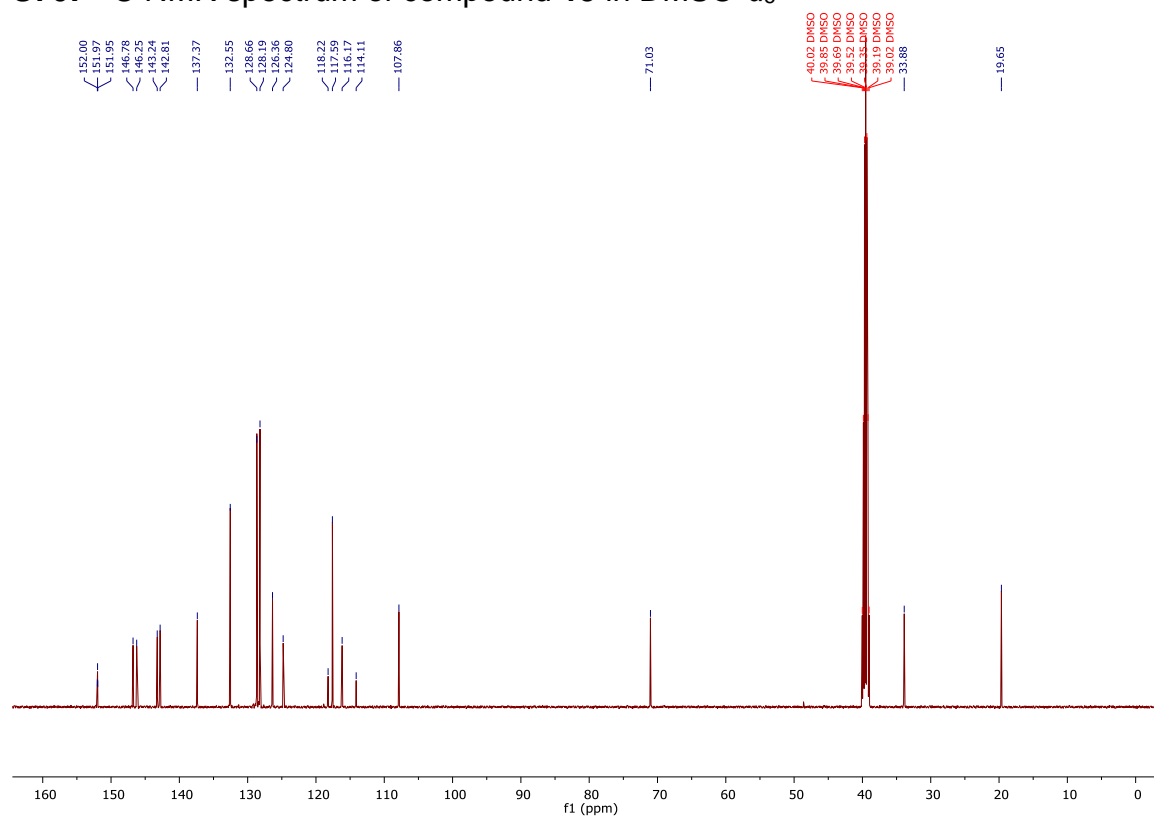

**S71:** COSY spectrum of compound **13** in  $\text{DMSO}-d_6$

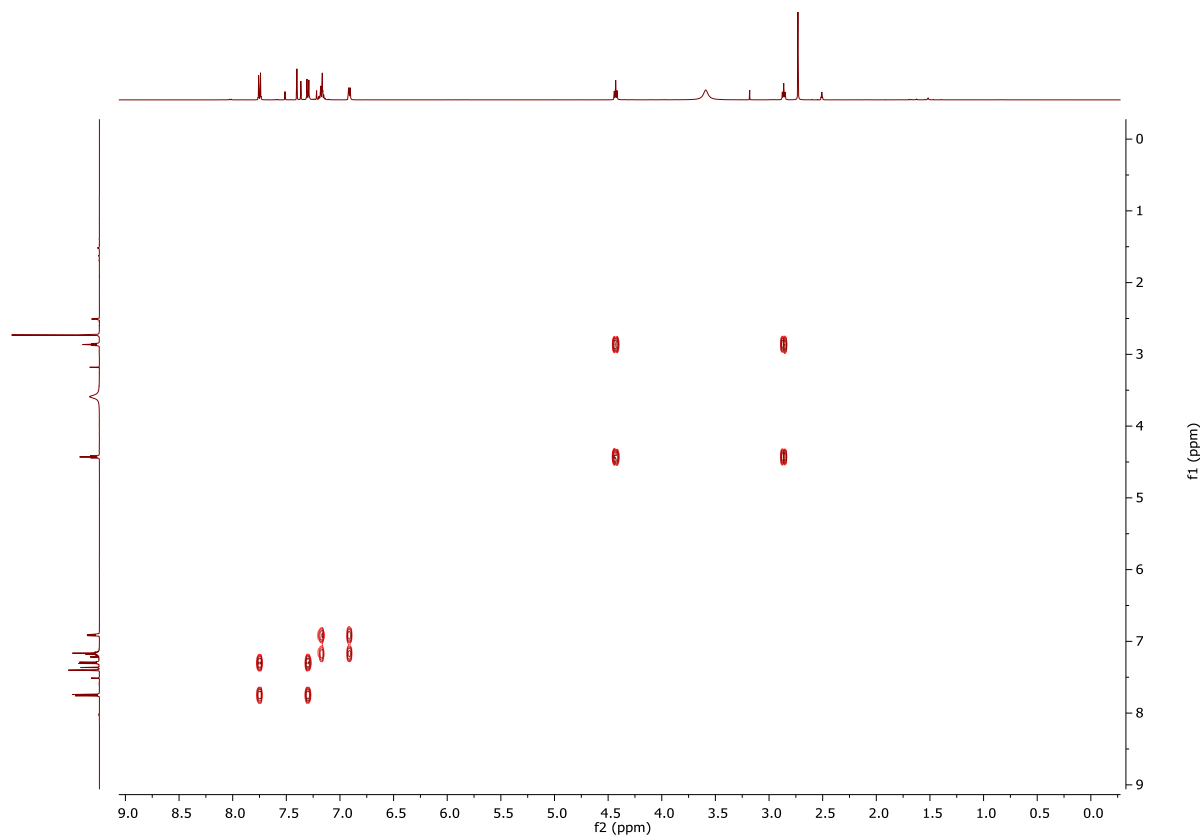

**S72:** HSQC spectrum of compound **13** in DMSO-*d*<sub>6</sub>

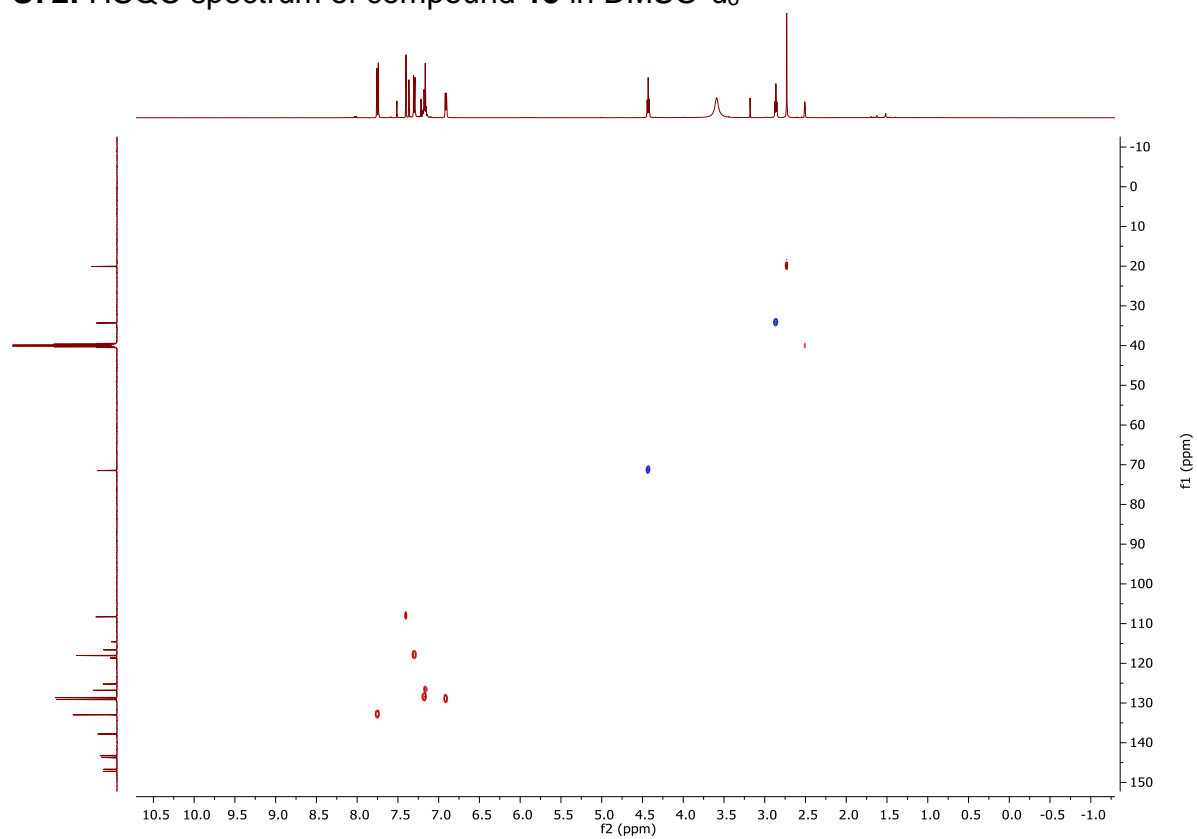

**S73:** HMBC spectrum of compound **13** in DMSO-*d*<sub>6</sub>

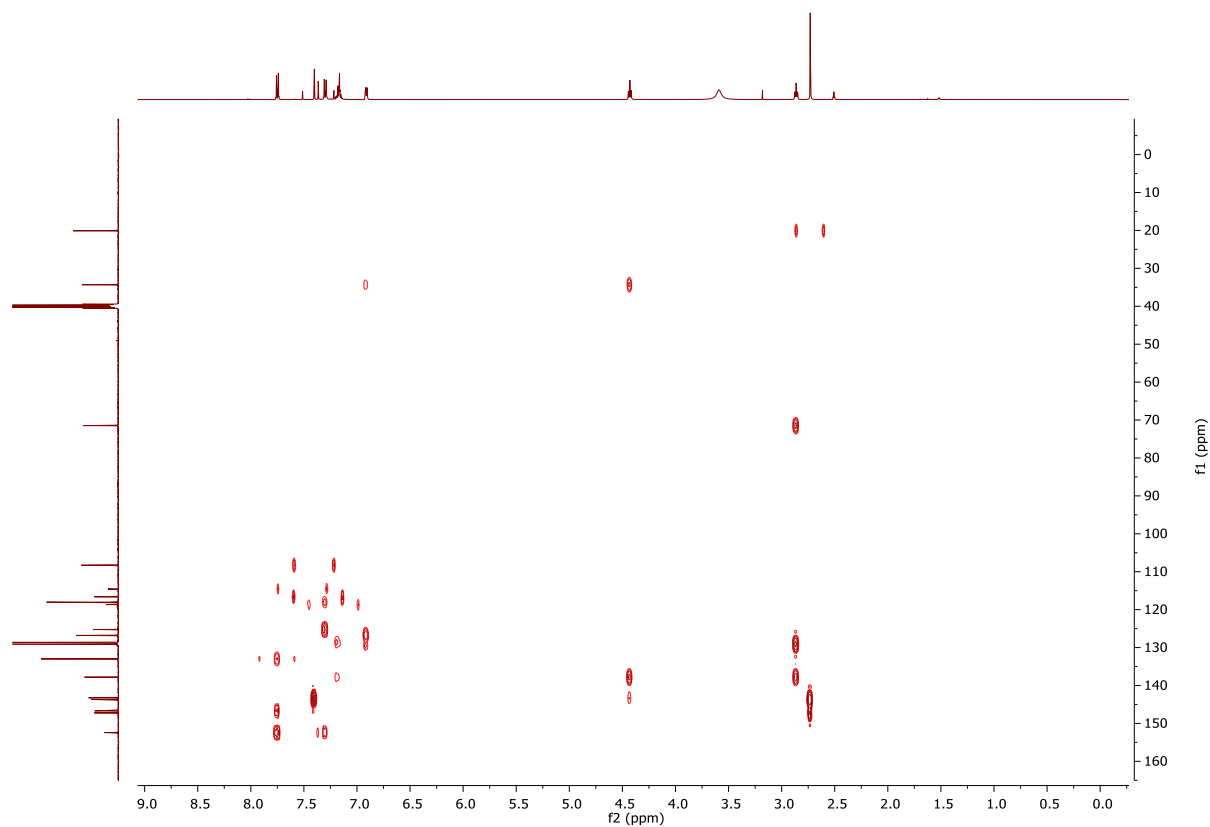

**S74: ROESY spectrum of compound 13 in DMSO- $d_6$**

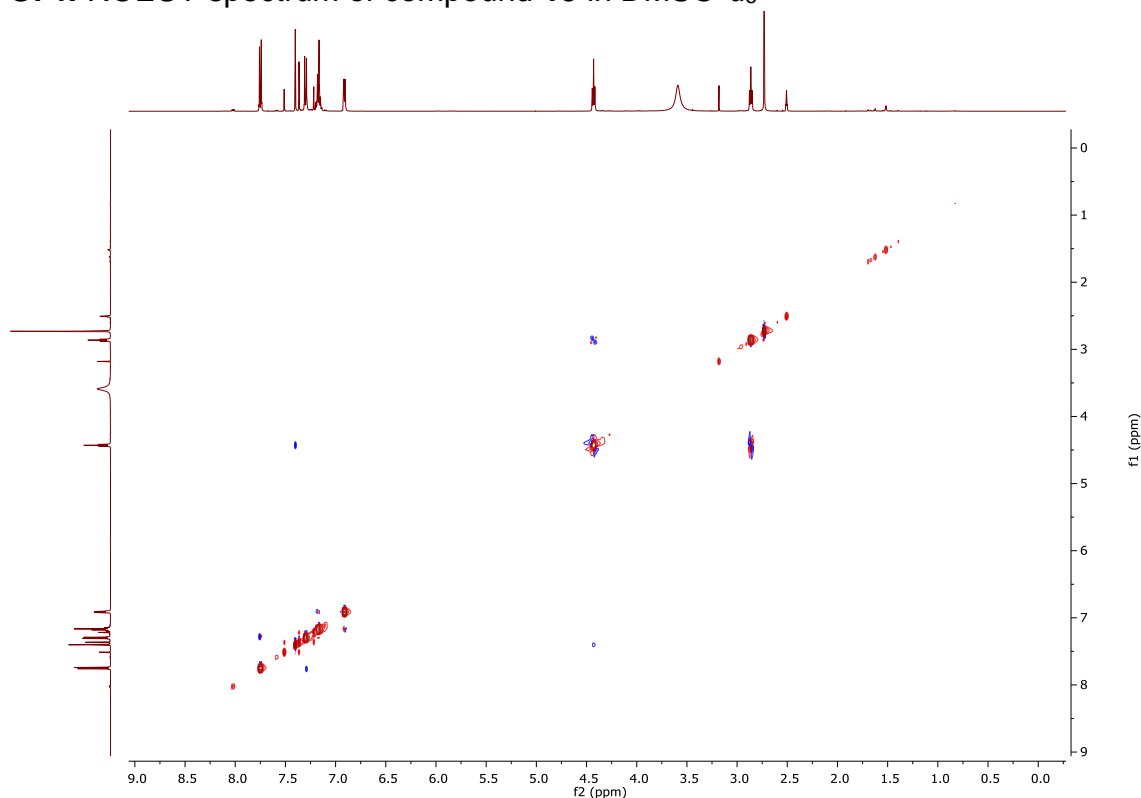

**S75: HRMS of compound 13**

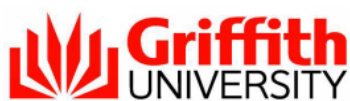

**High Resolution Mass Spectrum**

**Analysis Info**

Analysis Name D:\Data\KahYean\20200904\RAD865000002.d  
 Method DirectInfusion\_2018\_pos.m  
 Sample Name RAD865  
 Comment

Acquisition Date 9/4/2020 11:35:55 AM  
 Instrument maXis II ETD 1823391.22321

**+MS, 0.2-0.3min #10-16**

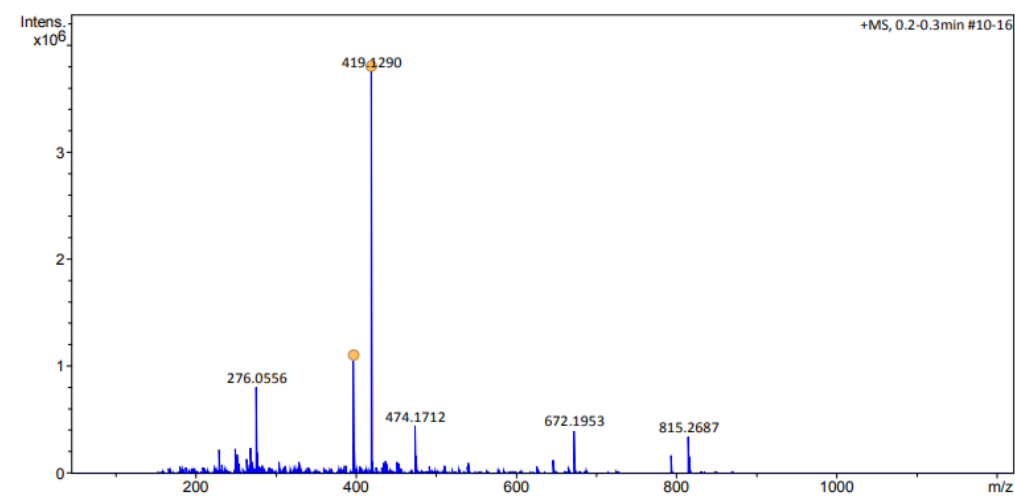

| Meas. m/z | # | Ion Formula    | m/z      | err [ppm] | mSigma | # mSigma | Score  | rdb  | e <sup>-</sup> Conf | N-Rule |
|-----------|---|----------------|----------|-----------|--------|----------|--------|------|---------------------|--------|
| 397.1470  | 1 | C21H19F2N4O2   | 397.1471 | 0.0       | 5.3    | 1        | 100.00 | 13.5 | even                | ok     |
| 419.1290  | 1 | C21H18F2N4NaO2 | 419.1290 | 0.0       | 9.3    | 1        | 100.00 | 13.5 | even                | ok     |



**S76:** NMR data of compound **14** in DMSO-*d*<sub>6</sub><sup>a</sup>

| Position | $\delta_{\text{H}}$ , mult. ( <i>J</i> in Hz), int. | $\delta_{\text{C}}$ , mult. ( <i>J</i> in Hz) | COSY | HMBC      |
|----------|-----------------------------------------------------|-----------------------------------------------|------|-----------|
| 3        |                                                     | 147.5, s                                      |      |           |
| 5        |                                                     | 126.3, s                                      |      |           |
| 6        | 8.30, s, 1H                                         | 127.8, s                                      |      | 5, 8      |
| 8        |                                                     | 137.4, q (37.9)                               |      |           |
| 9        |                                                     | 143.4, s                                      |      |           |
| 10       |                                                     | 125.6, s                                      |      |           |
| 11       | 7.75, m, 1H                                         | 133.2, s                                      | 12   | 3, 13,15  |
| 12       | 7.67, m, 1H                                         | 128.0, s                                      | 11   | 10,14     |
| 13       |                                                     | 135.8, s                                      |      |           |
| 14       | 7.67, m, 1H                                         | 128.0, s                                      | 15   | 10, 12    |
| 15       | 7.75, m, 1H                                         | 133.2, s                                      | 14   | 3, 11, 13 |
| 18       |                                                     | 119.9, q (275.1)                              |      |           |

<sup>a</sup> Recorded at 500 MHz (<sup>1</sup>H NMR) and 125 MHz (<sup>13</sup>C NMR) at 25 °C.

**S77:**  $^1\text{H}$  NMR Spectrum of compound **14** in DMSO- $d_6$

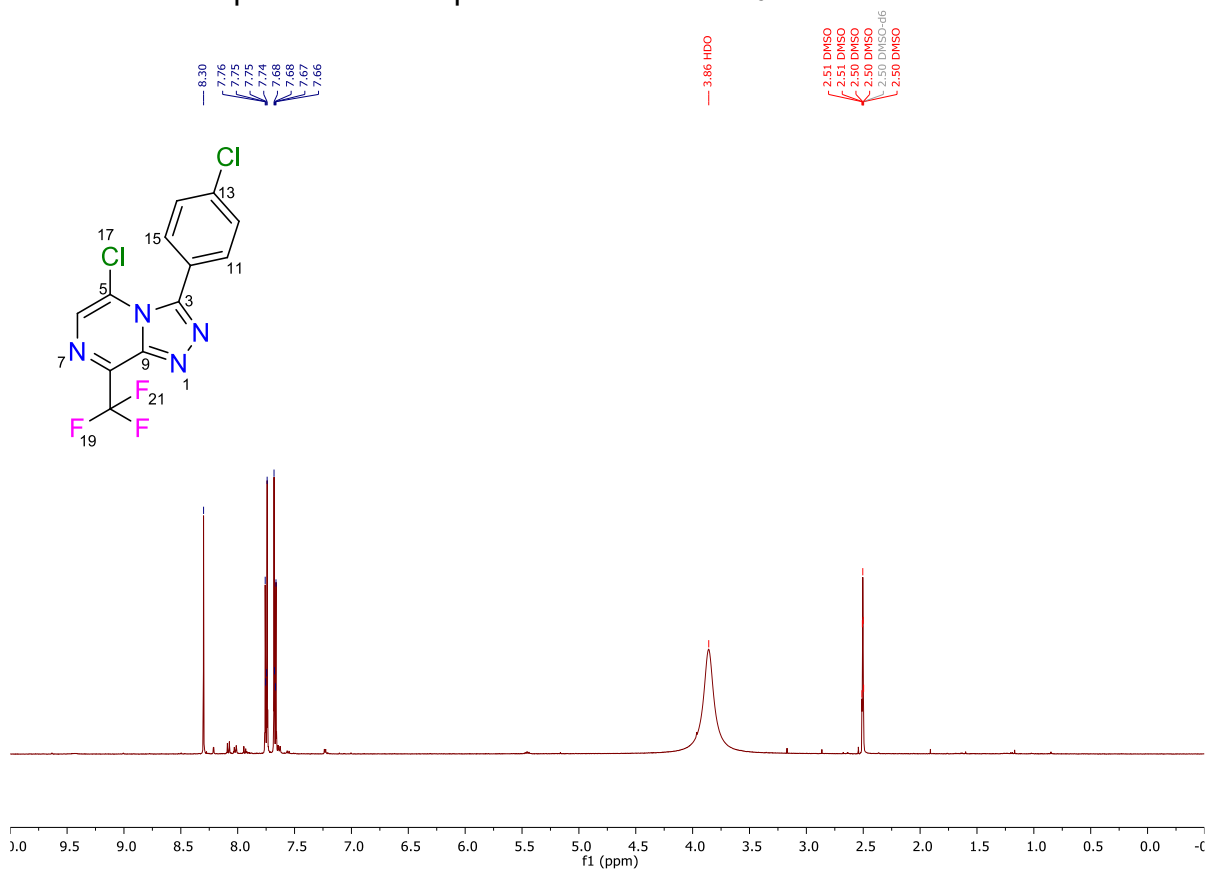

**S78:**  $^{13}\text{C}$  NMR spectrum of compound **14** in  $\text{DMSO}-d_6$

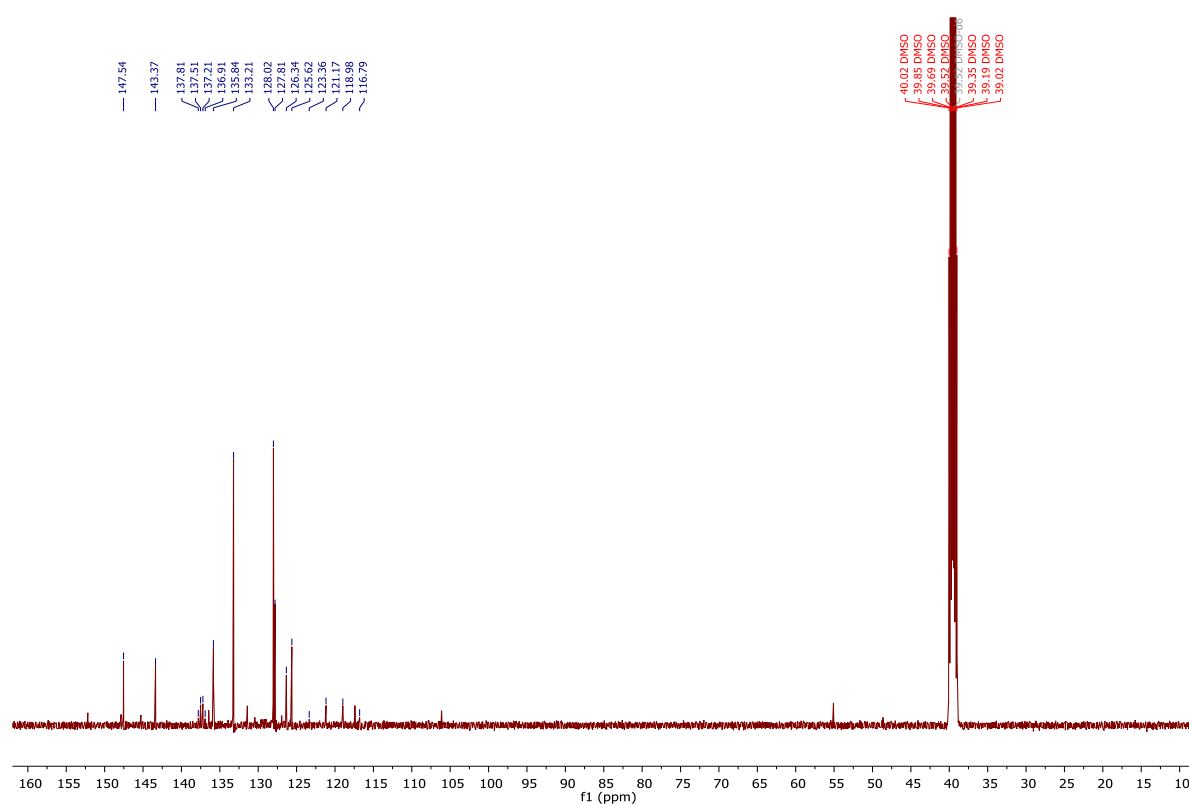

**S79:** COSY spectrum of compound **14** in  $\text{DMSO}-d_6$

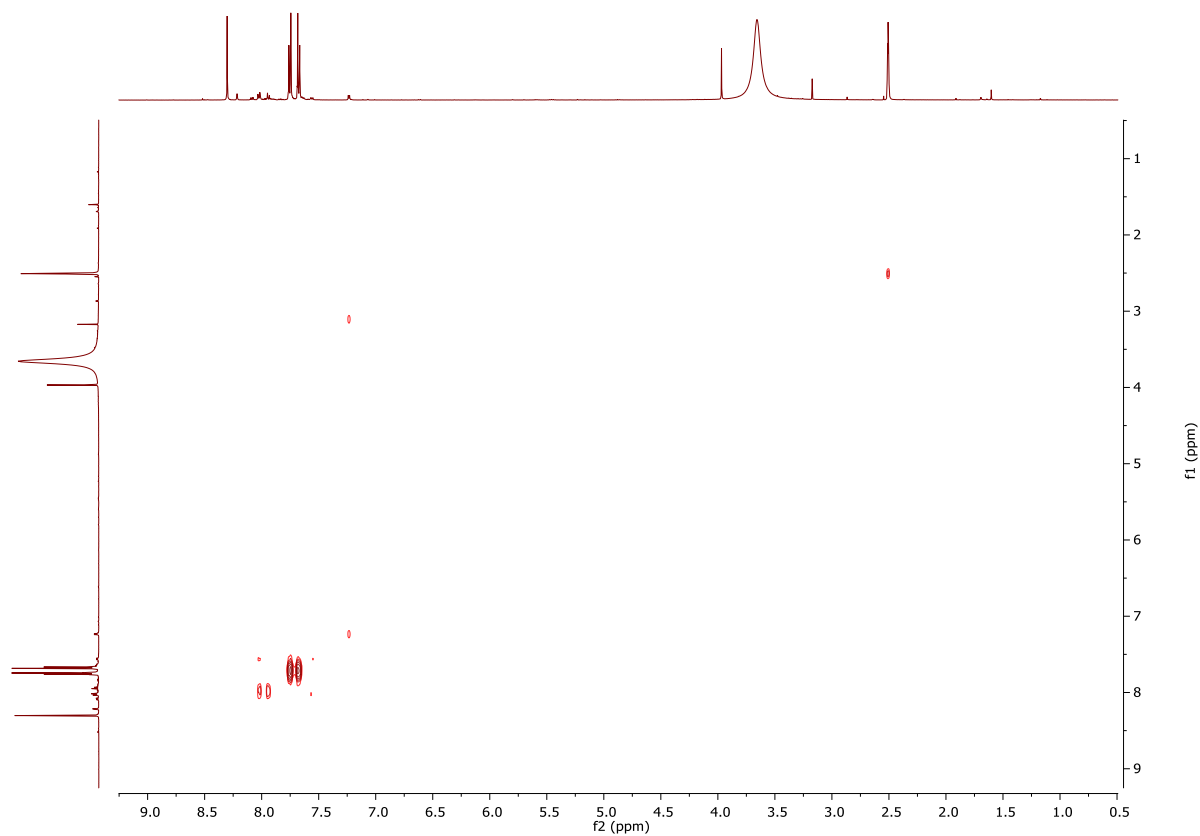

**S80:** HSQC spectrum of compound **14** in DMSO- $d_6$

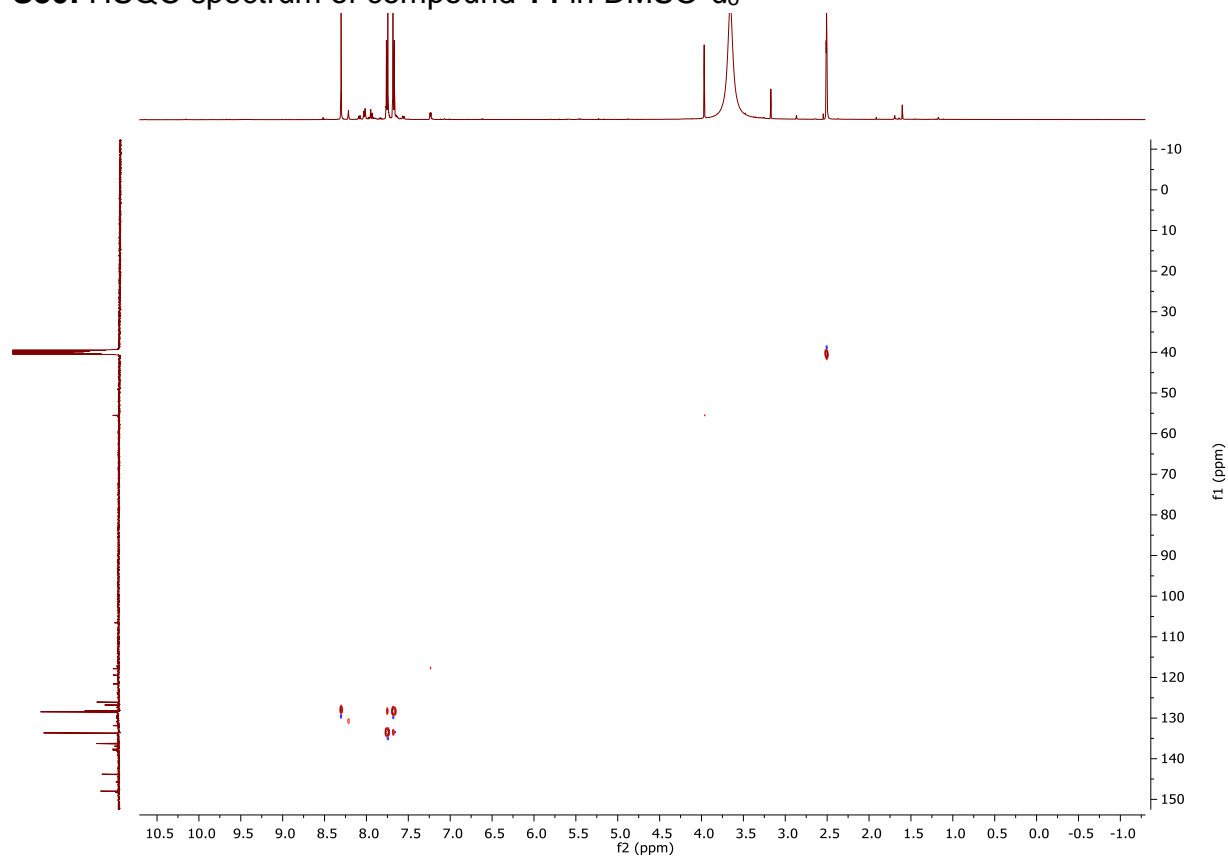

**S81:** HMBC spectrum of compound **14** in DMSO- $d_6$

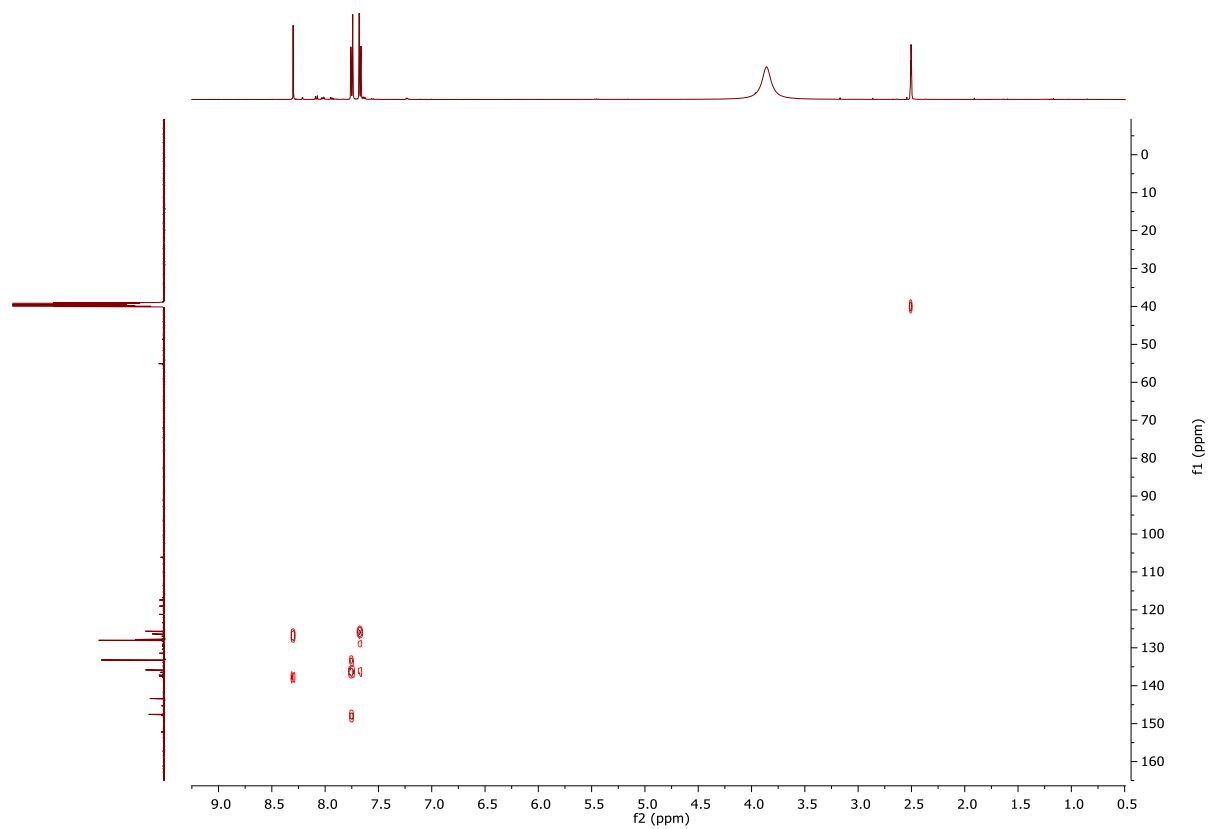

## S82: HRMS of compound 14

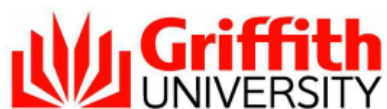

### High Resolution Mass Spectrum

#### Analysis Info

Analysis Name D:\Data\KahYean\20200904\RAD864000002.d

Method DirectInfusion\_2018\_pos.m

Sample Name RAD864

Comment

Acquisition Date 9/4/2020 10:42:02 AM

Instrument maXis II ETD 1823391.22321

#### +MS, 0.2-0.3min #9-15

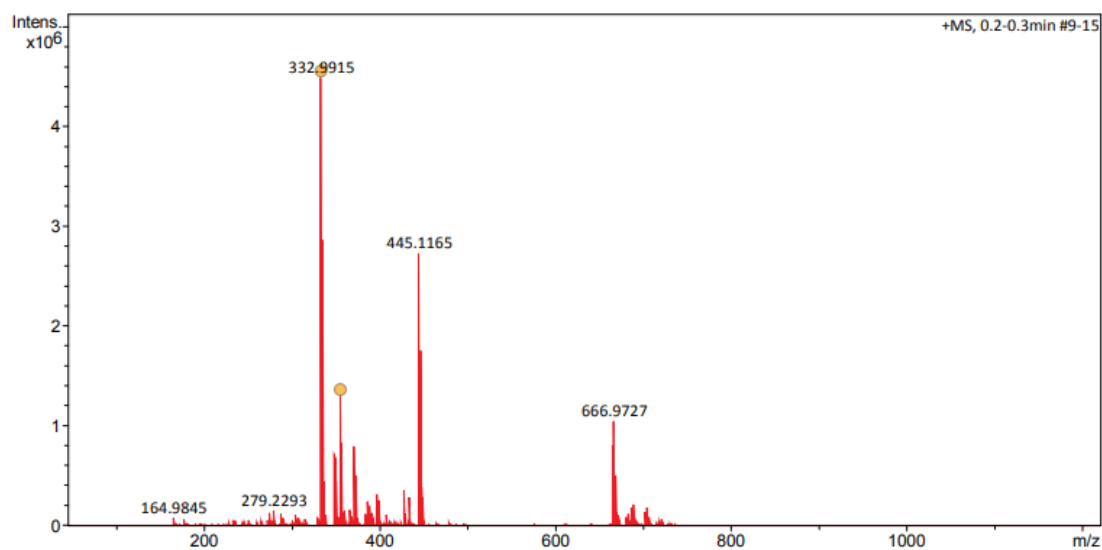

| Meas. m/z | # | Ion Formula                                                                     | m/z      | err [ppm] | mSigma | # mSigma | Score  | rdB | e <sup>-</sup> Conf | N-Rule |
|-----------|---|---------------------------------------------------------------------------------|----------|-----------|--------|----------|--------|-----|---------------------|--------|
| 332.9915  | 1 | C <sub>12</sub> H <sub>6</sub> Cl <sub>2</sub> F <sub>3</sub> N <sub>4</sub>    | 332.9916 | 0.5       | 9.6    | 1        | 100.00 | 9.5 | even                | ok     |
|           | 1 | C <sub>12</sub> H <sub>8</sub> Cl <sub>2</sub> N <sub>4</sub> NaO <sub>2</sub>  | 332.9917 | 0.6       | 11.5   | 1        | 100.00 | 9.5 | even                | ok     |
| 354.9734  | 1 | C <sub>12</sub> H <sub>5</sub> Cl <sub>2</sub> F <sub>3</sub> N <sub>4</sub> Na | 354.9736 | 0.5       | 9.9    | 1        | 100.00 | 9.5 | even                | ok     |

**S83:** NMR data of compound **15** in DMSO-*d*<sub>6</sub><sup>a</sup>

| Pos | δ <sub>H</sub> , mult. ( <i>J</i> in Hz), int. | δ <sub>C</sub> , mult. ( <i>J</i> in Hz) | COSY | HMBC      |
|-----|------------------------------------------------|------------------------------------------|------|-----------|
| 3   |                                                | 147.1, s                                 |      |           |
| 5   |                                                | 124.2, s                                 |      |           |
| 6   | 8.17, s, 1H                                    | 127.6, s                                 |      | 5, 8      |
| 8   |                                                | 144.9, t (31.3)                          |      |           |
| 9   |                                                | 143.9, s                                 |      |           |
| 10  |                                                | 126.0, s                                 |      |           |
| 11  | 7.75, m, 1H                                    | 133.2, s                                 | 12   | 3,13,15   |
| 12  | 7.65, m, 1H                                    | 127.9, s                                 | 11   | 10,14     |
| 13  |                                                | 135.7, s                                 |      |           |
| 14  | 7.65, m, 1H                                    | 127.9, s                                 | 15   | 10, 12    |
| 15  | 7.75, m, 1H                                    | 133.2, s                                 | 14   | 3, 11, 13 |
| 18  |                                                | 119.9, t (240.2)                         |      |           |
| 19  | 2.25, t, (19.3), 3H                            | 22.8, s                                  |      | 8, 19     |

<sup>a</sup> Recorded at 500 MHz (<sup>1</sup>H NMR) and 125 MHz (<sup>13</sup>C NMR) at 25 °C.

**S84:** <sup>1</sup>H NMR spectrum of compound **15** in DMSO-*d*<sub>6</sub>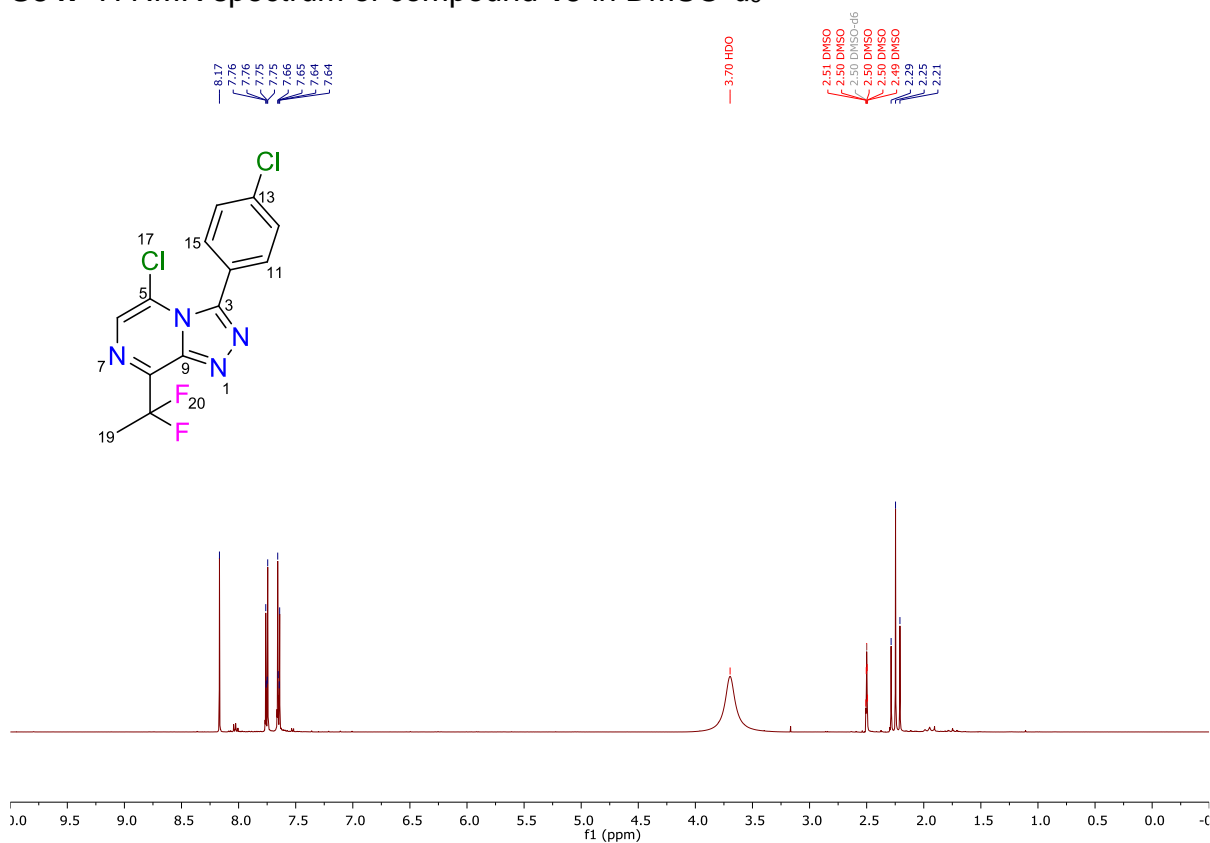

**S85:**  $^{13}\text{C}$  NMR spectrum of compound **15** in  $\text{DMSO}-d_6$

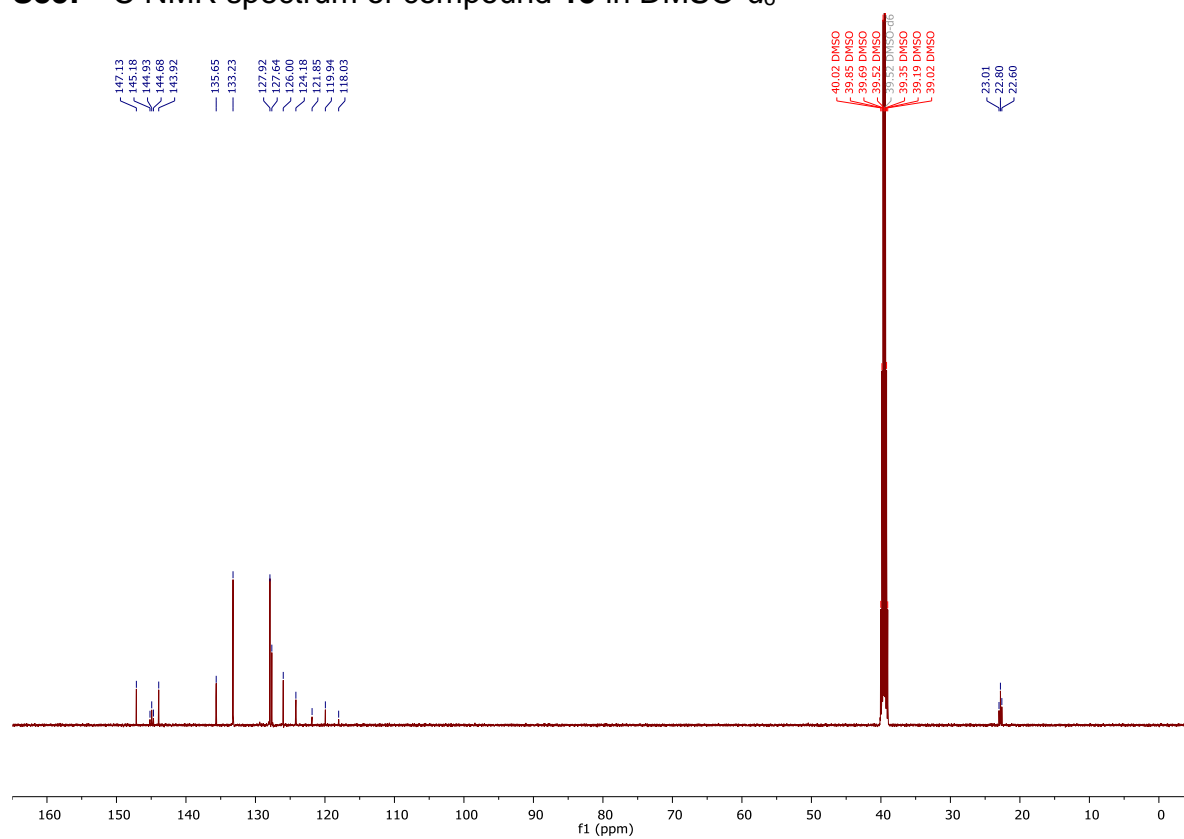

**S86:** COSY spectrum of compound **15** in  $\text{DMSO}-d_6$

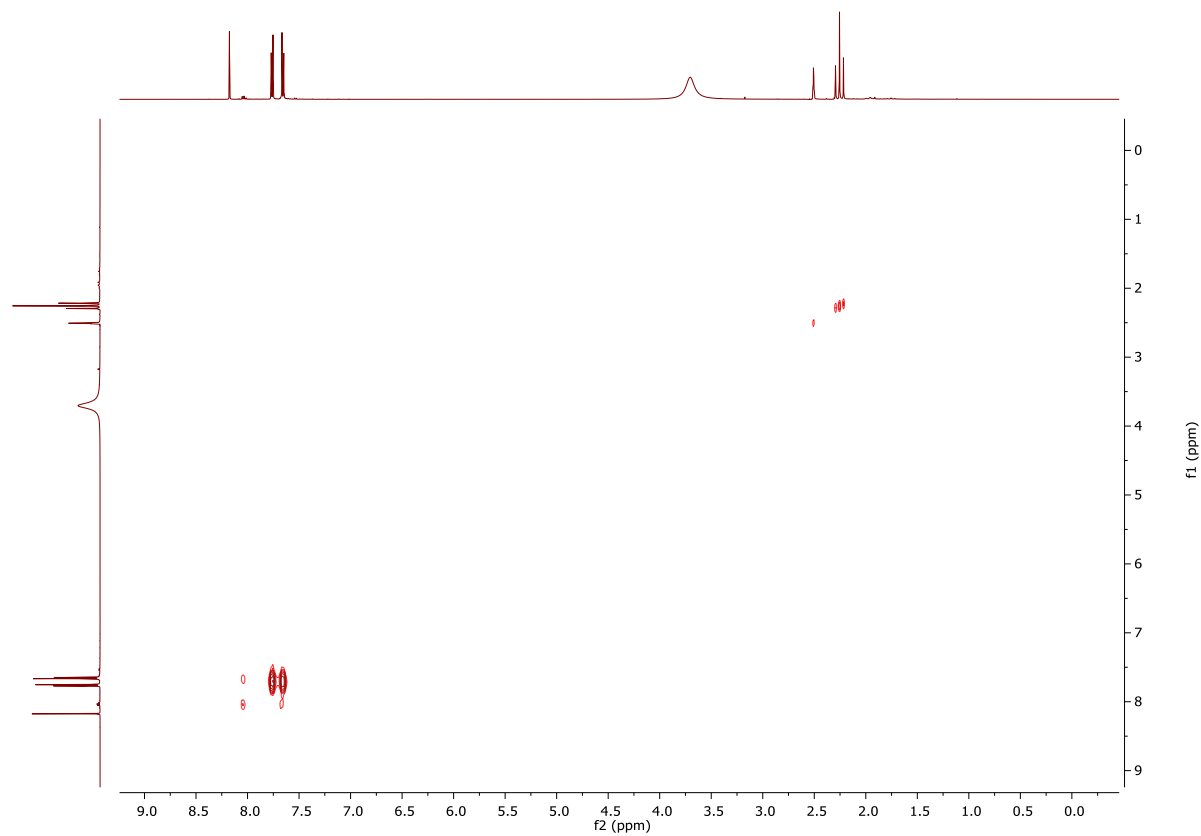

**S87:** HSQC spectrum of compound **15** in DMSO- $d_6$

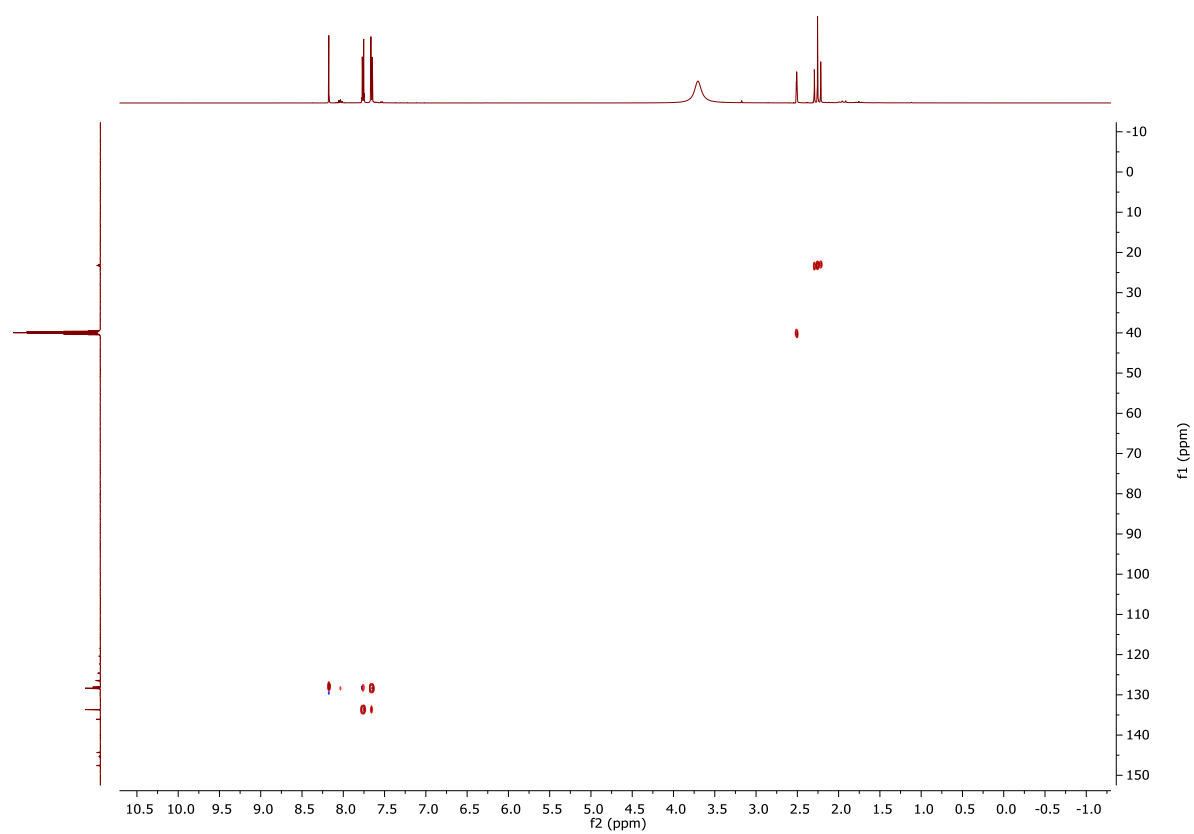

**S88:** HMBC spectrum of compound **15** in DMSO- $d_6$

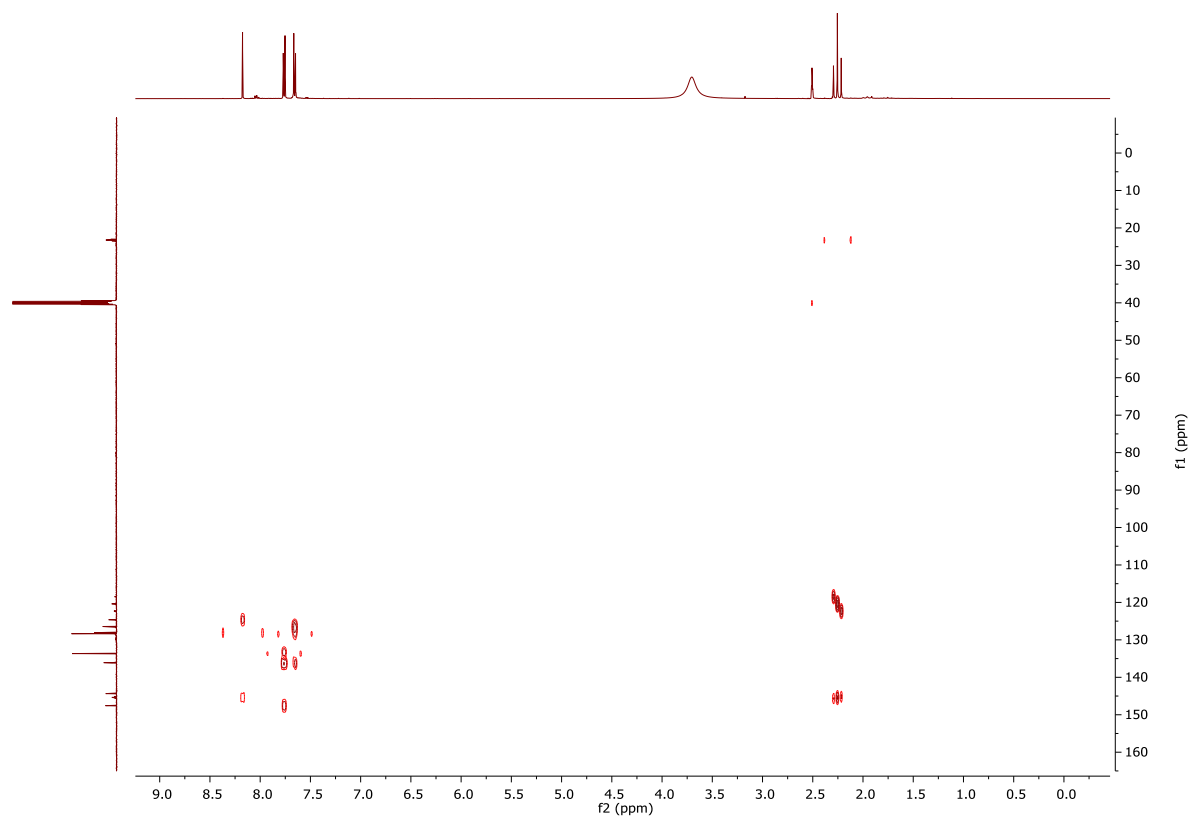

## S89: HRMS of compound 15

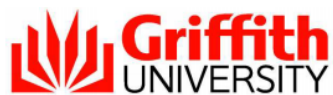

### High Resolution Mass Spectrum

#### Analysis Info

Analysis Name D:\Data\KahYean\20200904\RAD867000001.d  
Method DirectInfusion\_2018\_pos.m  
Sample Name RAD867  
Comment

Acquisition Date 9/4/2020 11:49:35 AM  
Instrument maXis II ETD 1823391.22321

#### +MS, 0.2min #13

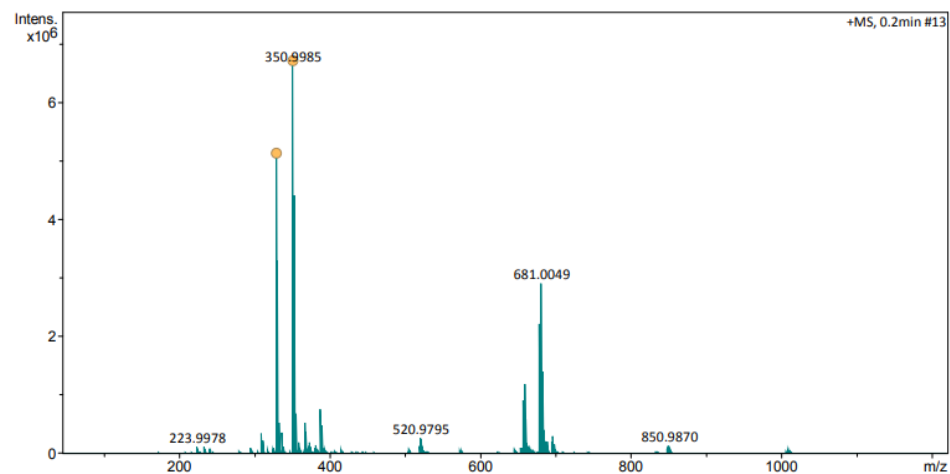

| Meas. m/z | # | Ion Formula                                                                     | m/z      | err [ppm] | mSigma | # mSigma | Score  | rdb | e <sup>-</sup> Conf | N-Rule |
|-----------|---|---------------------------------------------------------------------------------|----------|-----------|--------|----------|--------|-----|---------------------|--------|
| 329.0166  | 1 | C <sub>13</sub> H <sub>9</sub> Cl <sub>2</sub> F <sub>2</sub> N <sub>4</sub>    | 329.0167 | 0.4       | 6.3    | 1        | 100.00 | 9.5 | even                | ok     |
| 350.9985  | 1 | C <sub>13</sub> H <sub>8</sub> Cl <sub>2</sub> F <sub>2</sub> N <sub>4</sub> Na | 350.9986 | 0.4       | 7.6    | 1        | 100.00 | 9.5 | even                | ok     |



**S90:** NMR data of compound **16** in DMSO-*d*<sub>6</sub><sup>a</sup>

| Pos. | δ <sub>H</sub> , mult. (J in Hz), int | δ <sub>C</sub> , mult. (J in Hz) | COSY | HMBC       |
|------|---------------------------------------|----------------------------------|------|------------|
| 3    |                                       | 146.4, s                         |      |            |
| 5    | 8.74, d (4.8), 1H                     | 119.5, s                         | 6    | 3, 6, 9    |
| 6    | 8.04, d (4.8), 1H                     | 128.5, s                         | 5    | 5, 8       |
| 8    |                                       | 146.4, t (30.9)                  |      |            |
| 9    |                                       | 142.6, s                         |      |            |
| 10   |                                       | 124.4, s                         |      |            |
| 11   | 7.98, m, 1H                           | 130.3, s                         | 12   | 3, 13,15   |
| 12   | 7.73, m, 1H                           | 129.5, s                         | 11   | 10, 13,14  |
| 13   |                                       | 135.6, s                         |      |            |
| 14   | 7.73, m, 1H                           | 129.5, s                         | 15   | 10, 12, 13 |
| 15   | 7.98, m, 1H                           | 130.3, s                         | 14   | 3 11, 13   |
| 17   |                                       | 120.0, t (239.7)                 |      |            |
| 18   | 2.25, t (19.2), 3H                    | 22.7, t (25.6)                   |      | 8, 17      |

<sup>a</sup> Recorded at 500 MHz (<sup>1</sup>H NMR) and 125 MHz (<sup>13</sup>C NMR) at 25 °C.

**S91:** <sup>1</sup>H NMR Spectrum of compound **16** in DMSO-*d*<sub>6</sub>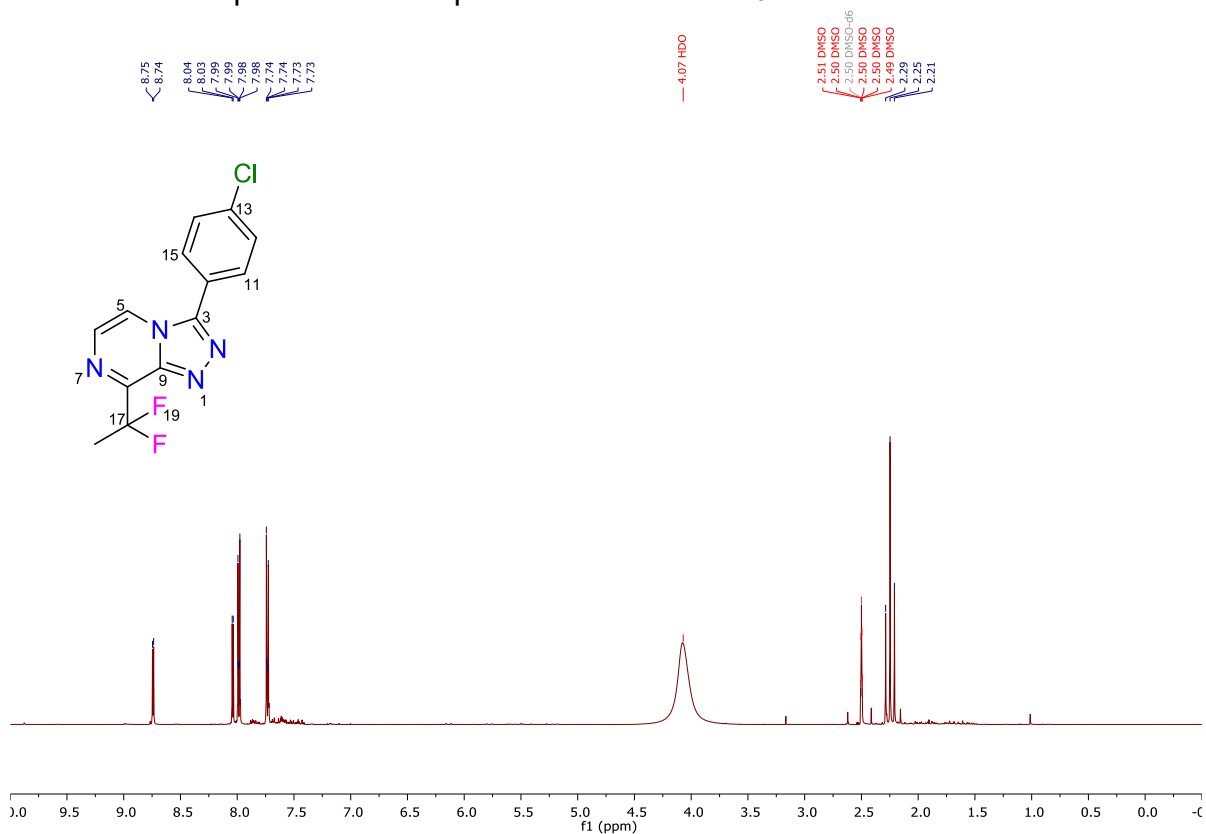

**S92:**  $^{13}\text{C}$  NMR spectrum of compound **16** in  $\text{DMSO}-d_6$

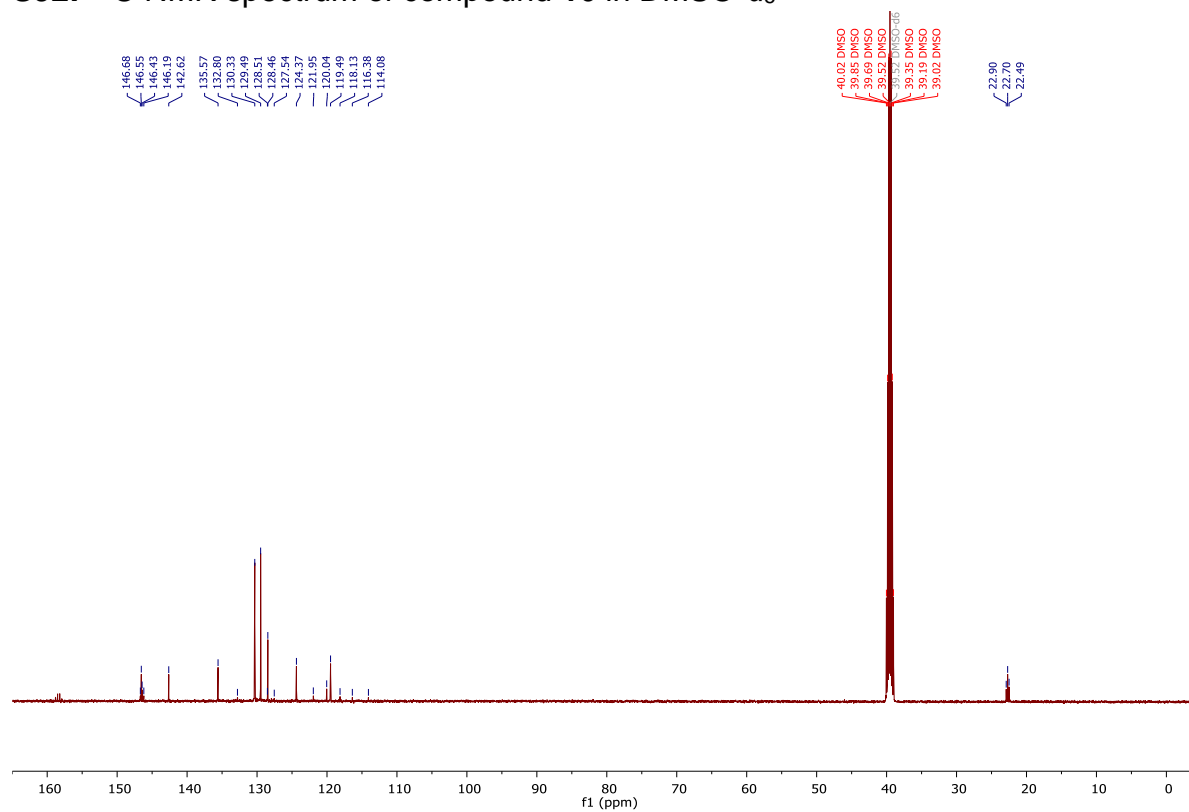

**S93:** COSY spectrum of compound **16** in  $\text{DMSO}-d_6$

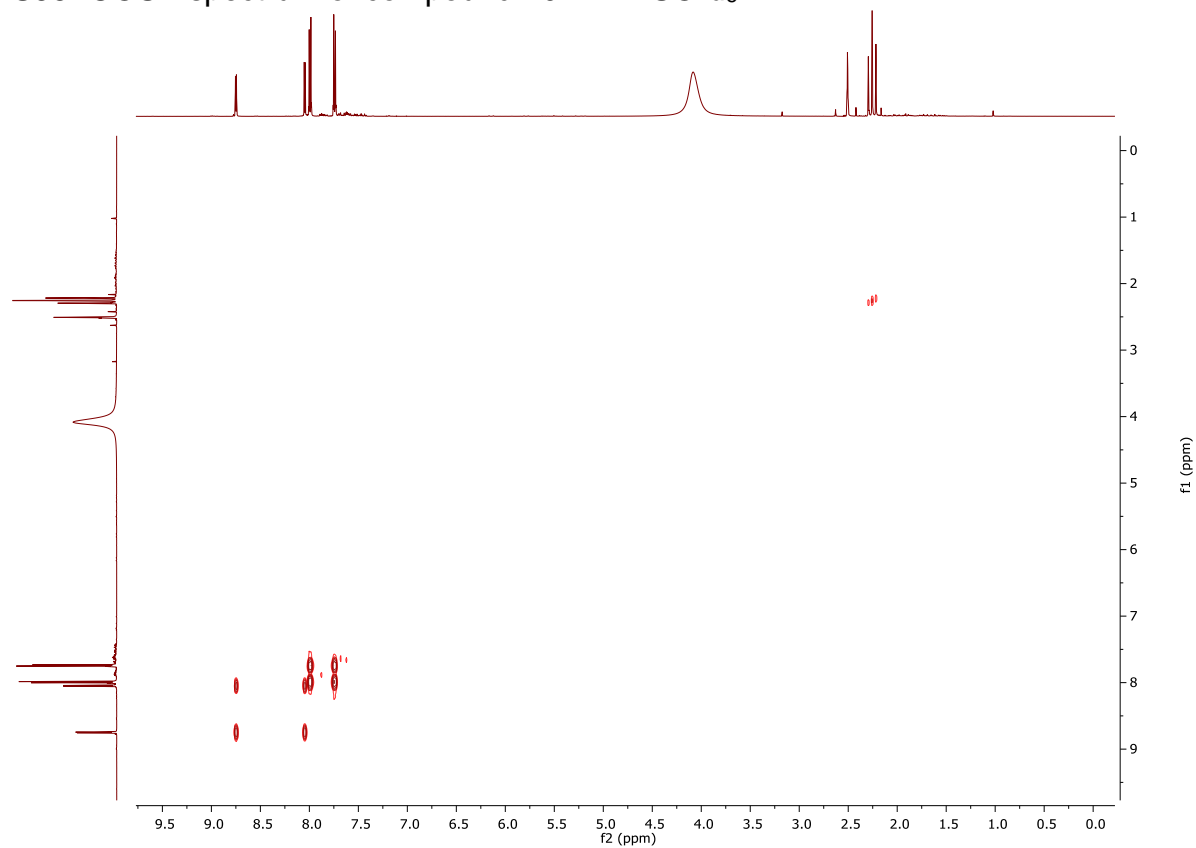

**S94:** HSQC spectrum of compound **16** in DMSO- $d_6$

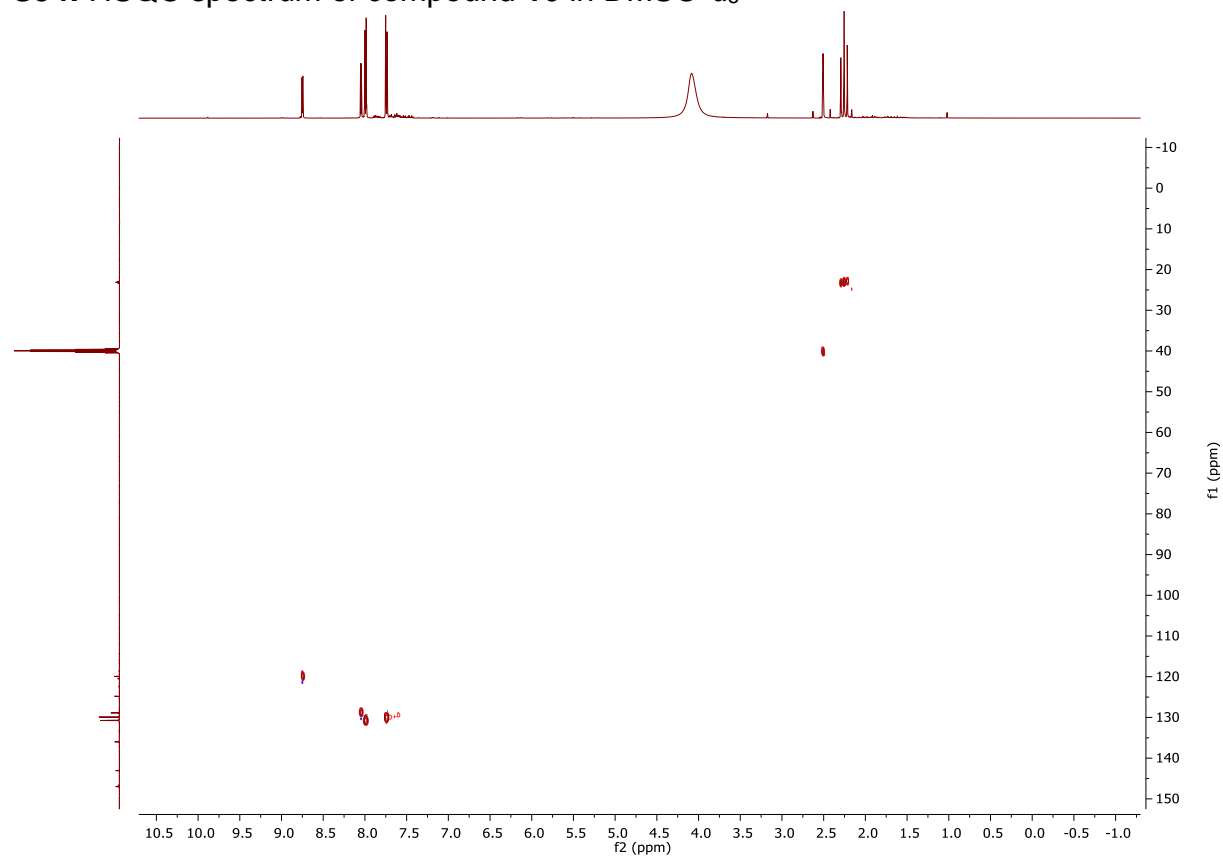

**S95:** HMBC spectrum of compound **16** in DMSO- $d_6$

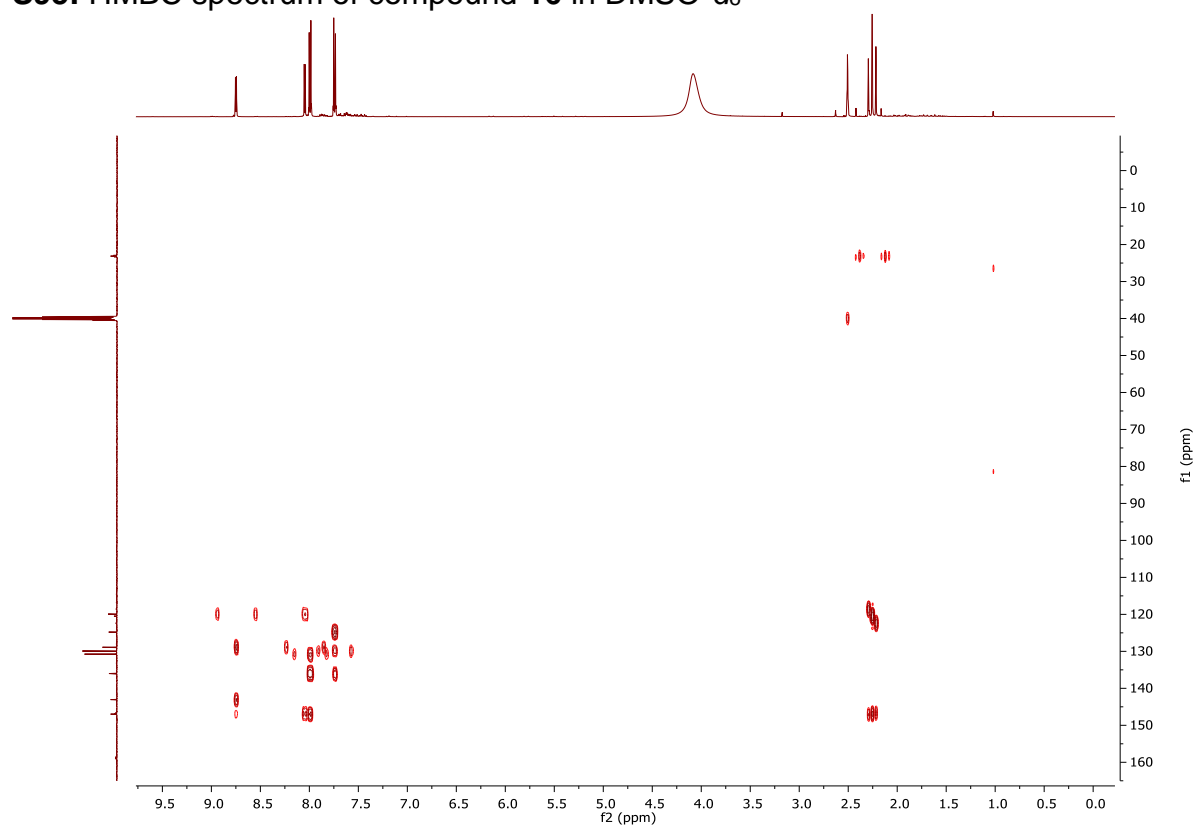

## S96: HRMS of compound 16

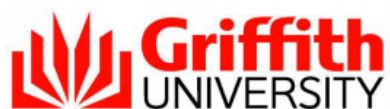

### High Resolution Mass Spectrum

#### Analysis Info

Analysis Name D:\Data\KahYean\20200904\RAD868000002.d

Method DirectInfusion\_2018\_pos.m

Sample Name RAD868

Comment

Acquisition Date 9/4/2020 12:05:33 PM

Instrument maXis II ETD 1823391.22321

#### +MS, 0.3-0.3min #18-19

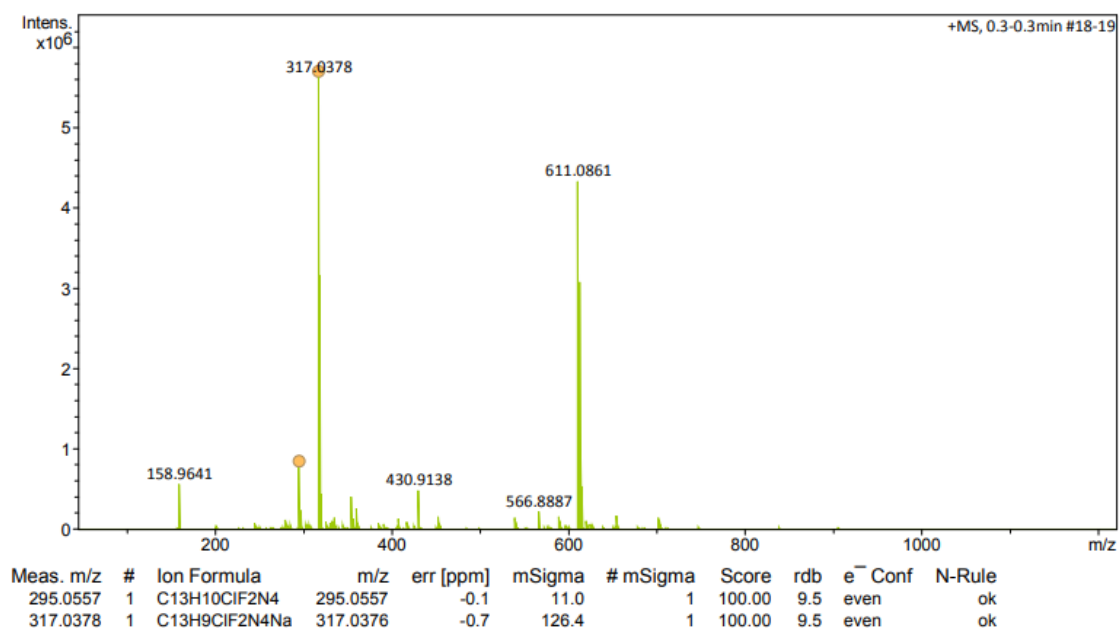

**S97:** NMR data of compound **17** in DMSO-*d*<sub>6</sub><sup>a</sup>

| Pos. | δ <sub>H</sub> , mult. ( <i>J</i> in Hz), int. | δ <sub>C</sub> , mult. ( <i>J</i> in Hz) | COSY   | HMBC       |
|------|------------------------------------------------|------------------------------------------|--------|------------|
| 3    |                                                | 147.1, s                                 |        |            |
| 5    |                                                | 120.1, s                                 |        |            |
| 6    | 7.99, s, 1H                                    | 128.5, s                                 |        | 5, 8, 9    |
| 8    |                                                | 156.3, s                                 |        |            |
| 9    |                                                | 145.9, s                                 |        |            |
| 10   |                                                | 126.3, s                                 |        |            |
| 11   | 7.74, m, 1H                                    | 133.2, s                                 | 12     | 3, 13, 15  |
| 12   | 7.62, m, 1H                                    | 127.8, s                                 | 11     | 10, 14     |
| 13   |                                                | 135.4, s                                 |        |            |
| 14   | 7.62, m, 1H                                    | 127.8, s                                 | 15     | 10, 12     |
| 15   | 7.74, m, 1H                                    | 133.2, s                                 | 14     | 3, 11, 13  |
| 18   | 3.75, m, 1H                                    | 38.5, s                                  | 19, 23 | 8, 20, 24  |
| 19   | 2.00, 2.14, m, 2H                              | 26.7, d (9.6)                            | 18, 20 | 18, 20, 21 |
| 20   | 2.08, 2.17, m, 2H                              | 32.6, dd (23.8, 23.8)                    | 19     | 18, 19, 21 |
| 21   |                                                | 123.9, dd (239.3, 241.6)                 |        |            |
| 22   | 2.08, 2.17, m, 2H                              | 32.6, dd (23.8, 23.8)                    | 23     | 18, 21, 23 |
| 23   | 2.00, 2.14, m, 2H                              | 26.7, d (9.6)                            | 18, 22 | 18, 21, 22 |

<sup>a</sup> Recorded at 500 MHz (<sup>1</sup>H NMR) and 125 MHz (<sup>13</sup>C NMR) at 25 °C.

**S98:** <sup>1</sup>H NMR Spectrum of compound **17** in DMSO-*d*<sub>6</sub>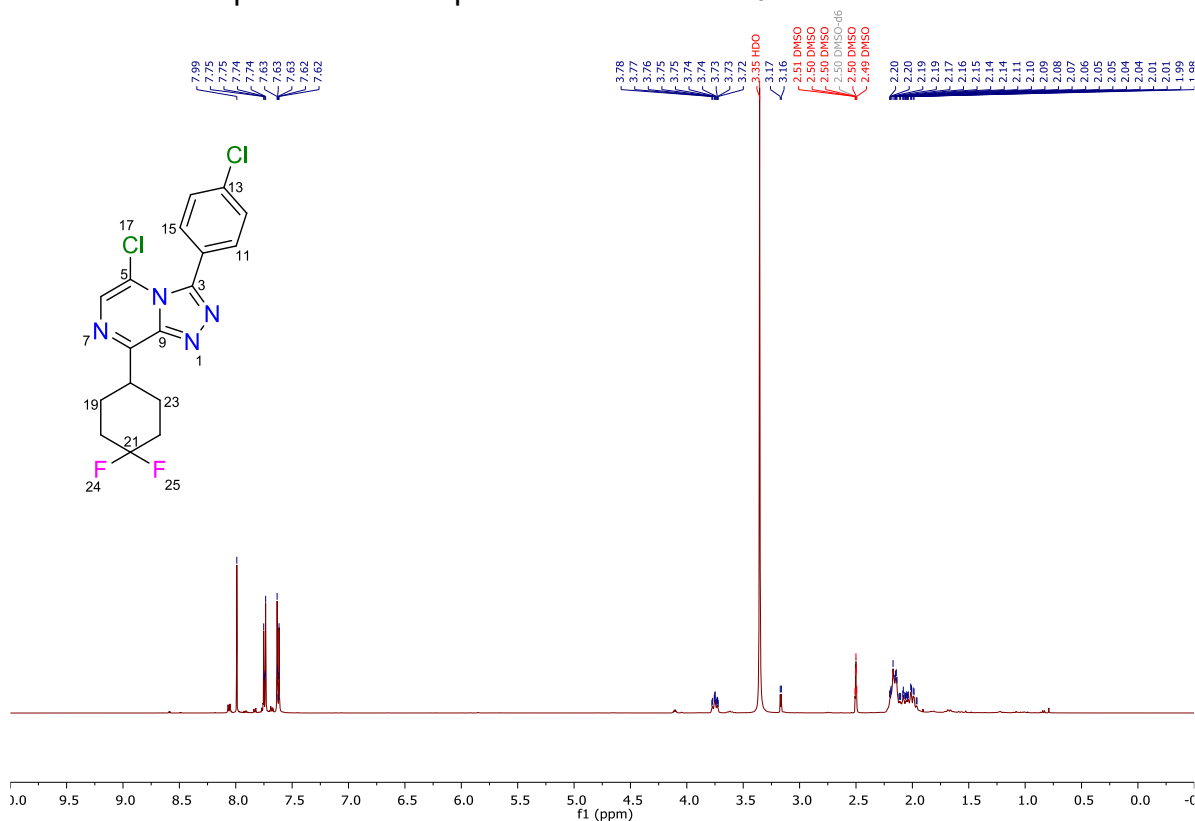

**S99:**  $^{13}\text{C}$  NMR spectrum of compound **17** in  $\text{DMSO}-d_6$

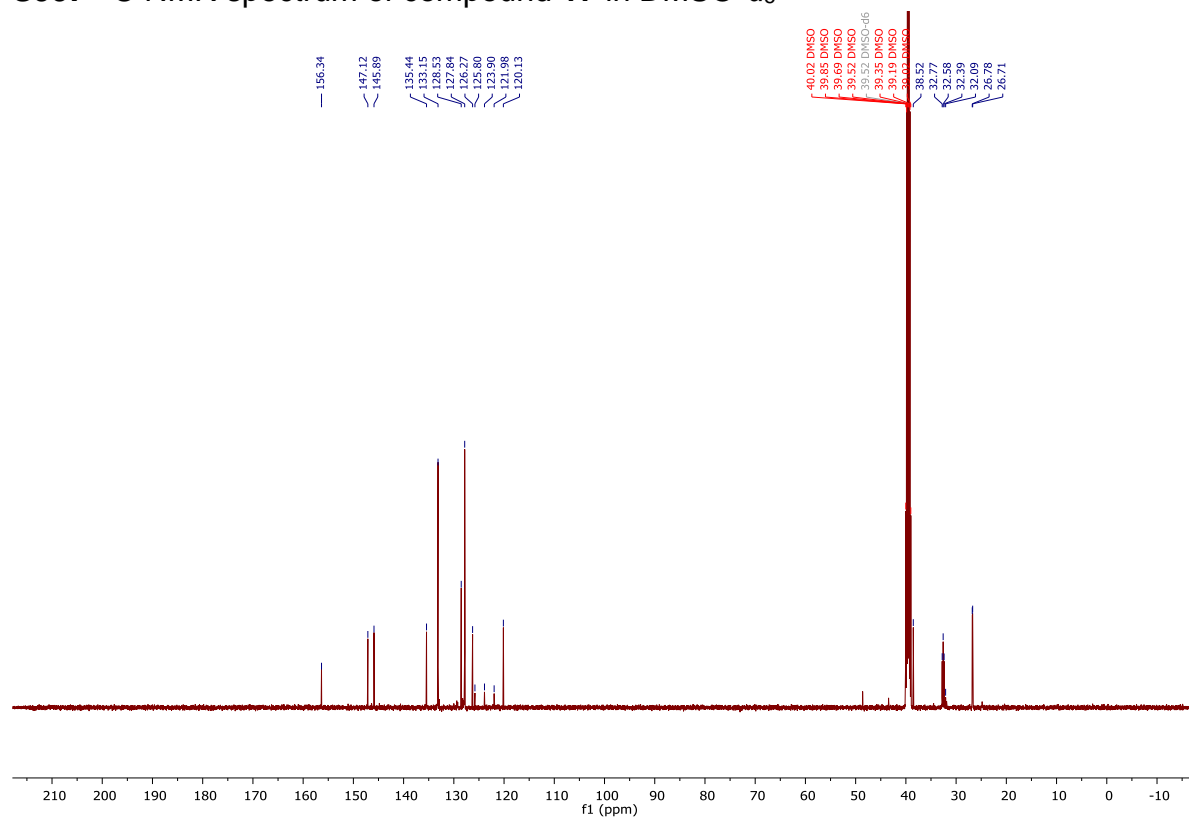

**S100:** COSY spectrum of compound **17** in  $\text{DMSO}-d_6$

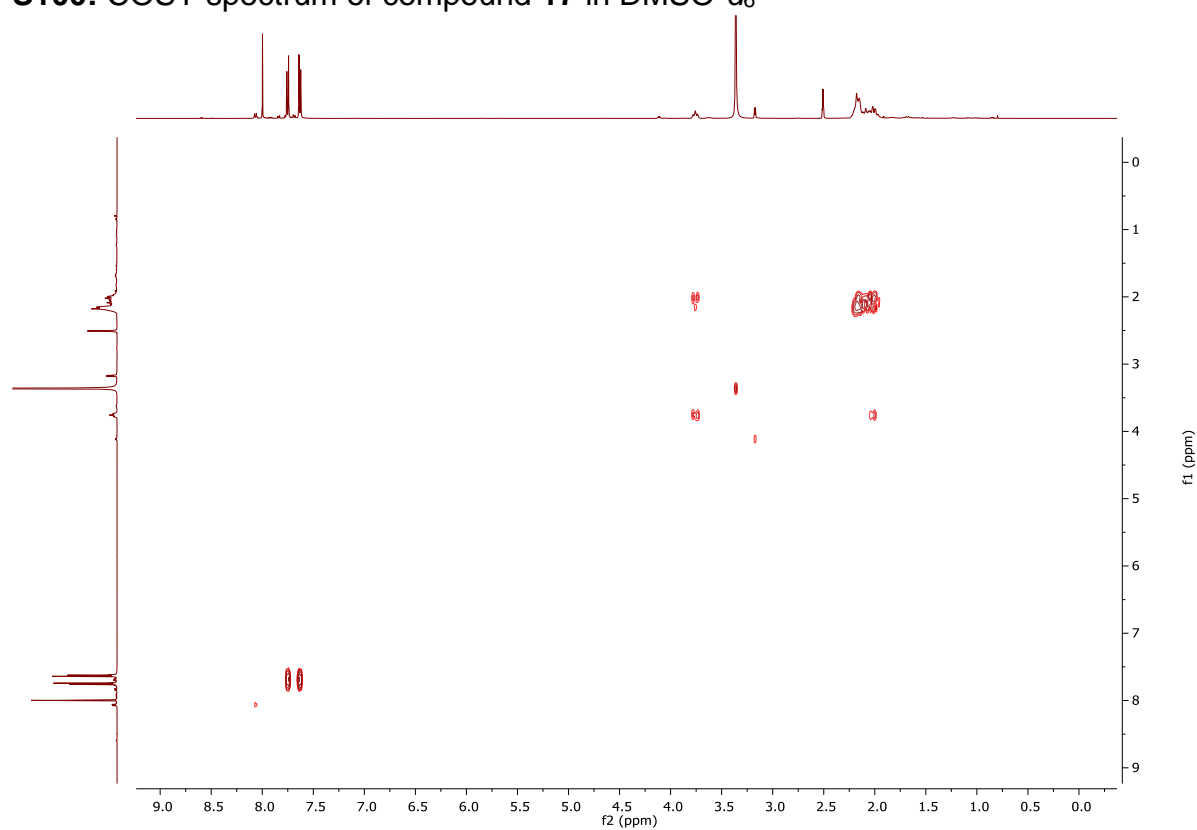

**S101:** HSQC spectrum of compound **17** in DMSO- $d_6$

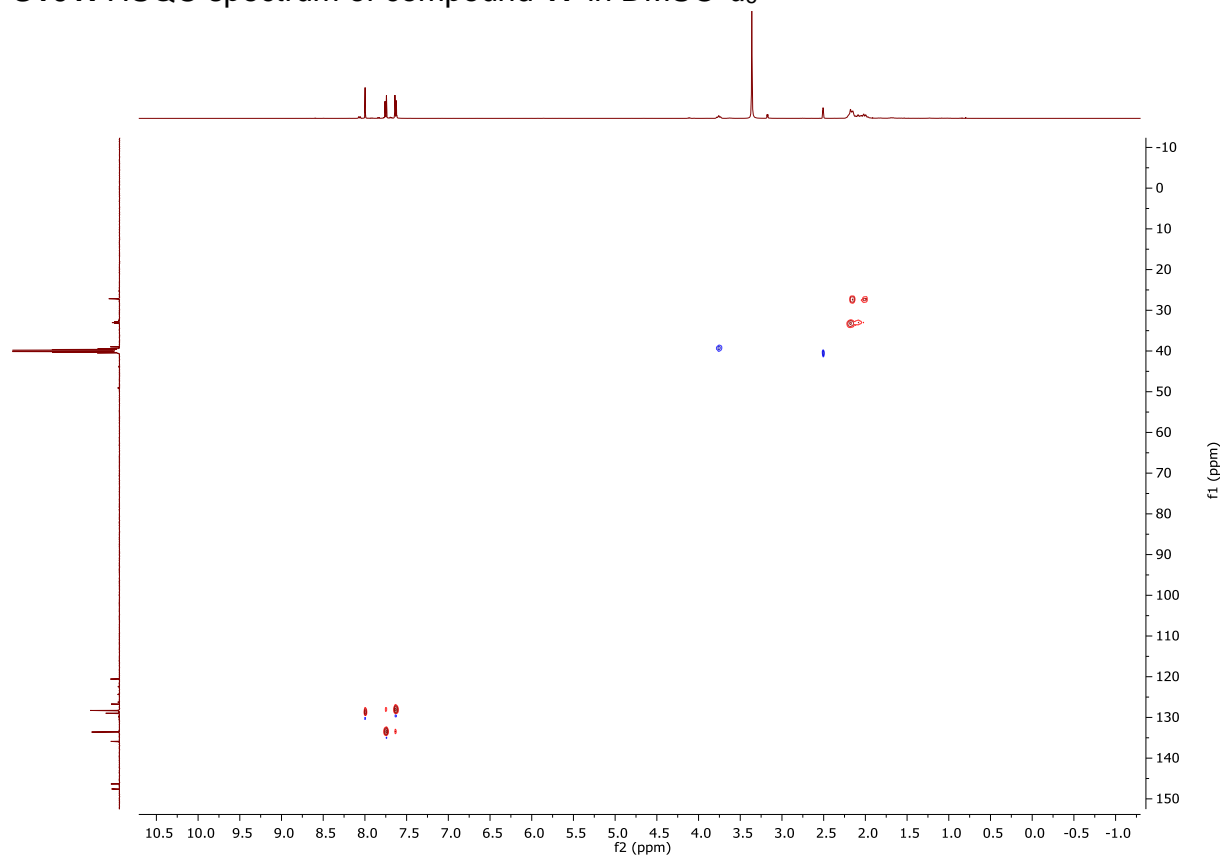

**S102:** HMBC spectrum of compound **17** in DMSO- $d_6$

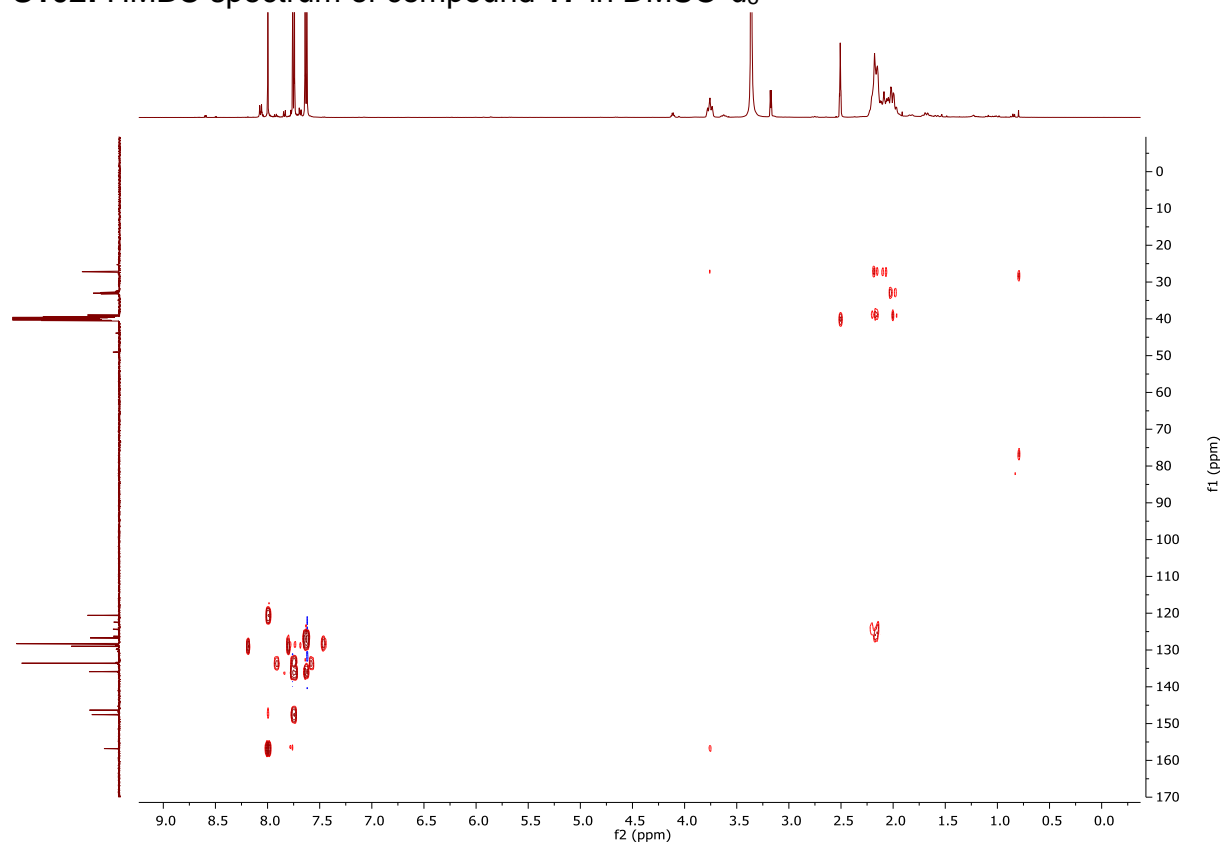

# S103: HRMS of compound 17

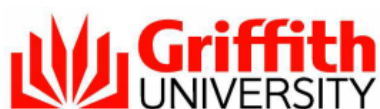

## High Resolution Mass Spectrum

### Analysis Info

Analysis Name D:\Data\KahYean\20200904\RAD869000001.d

Method DirectInfusion\_2018\_pos.m

Sample Name RAD869

Comment

Acquisition Date 9/4/2020 12:15:43 PM

Instrument maXis II ETD 1823391.22321

### +MS, 0.5-0.5min #26-27

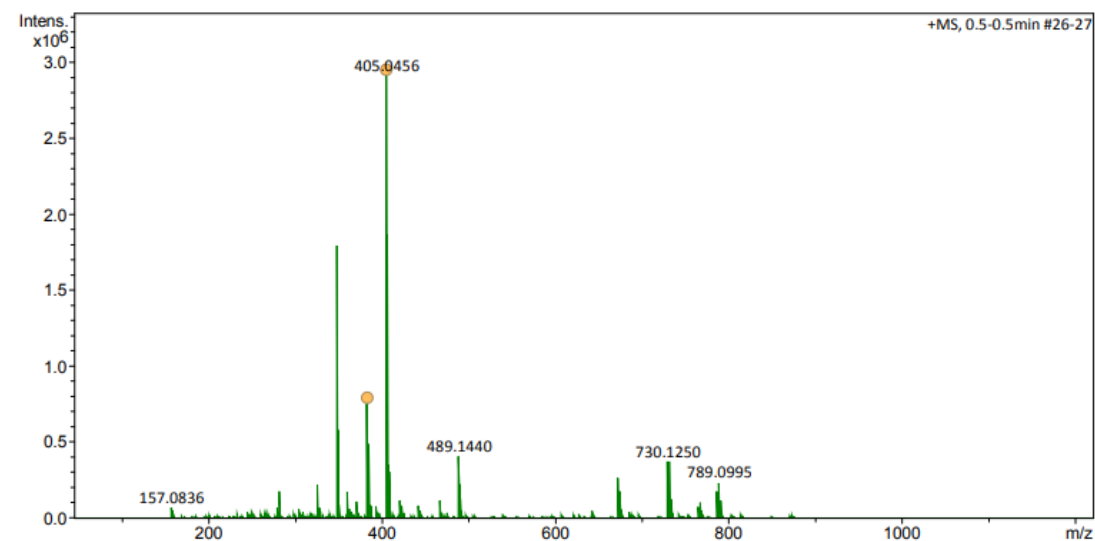

| Meas. m/z | # | Ion Formula                                                                      | m/z      | err [ppm] | mSigma | # mSigma | Score  | rdb  | e <sup>-</sup> Conf | N-Rule |
|-----------|---|----------------------------------------------------------------------------------|----------|-----------|--------|----------|--------|------|---------------------|--------|
| 383.0636  | 1 | C <sub>17</sub> H <sub>15</sub> Cl <sub>2</sub> F <sub>2</sub> N <sub>4</sub>    | 383.0636 | -0.0      | 7.7    | 1        | 100.00 | 10.5 | even                | ok     |
| 405.0456  | 1 | C <sub>17</sub> H <sub>14</sub> Cl <sub>2</sub> F <sub>2</sub> N <sub>4</sub> Na | 405.0456 | -0.0      | 9.0    | 1        | 100.00 | 10.5 | even                | ok     |



**S104:** NMR data of compound **18** in DMSO-*d*<sub>6</sub><sup>a</sup>

| Pos. | δ <sub>H</sub> , mult. ( <i>J</i> in Hz), int. | δ <sub>C</sub> , mult. ( <i>J</i> in Hz) | COSY   | HMBC           |
|------|------------------------------------------------|------------------------------------------|--------|----------------|
| 3    |                                                | 146.4, s                                 |        |                |
| 5    | 8.49, d (4.9), 1H                              | 115.6, s                                 | 6      | 21             |
| 6    | 7.90, d (4.9), 1H                              | 129.6, s                                 | 5      | 5, 8           |
| 8    |                                                | 157.6, s                                 |        |                |
| 9    |                                                | 144.7, s                                 |        |                |
| 10   |                                                | 124.7, s                                 |        |                |
| 11   | 7.97, m, 1H                                    | 130.0, s                                 | 12     | 3, 13,15       |
| 12   | 7.71, m, 1H                                    | 129.4, s                                 | 11     | 10,14          |
| 13   |                                                | 135.3, s                                 |        |                |
| 14   | 7.71, m, 1H                                    | 129.4, s                                 | 15     | 10, 12         |
| 15   | 7.97, m, 1H                                    | 130.0, s                                 | 14     | 3, 11, 13      |
| 17   | 3.75, m, 1H                                    | 38.9, s                                  | 18, 22 | 8, 18          |
| 18   | 2.03, 2.15, m, 2H                              | 26.7, d (9.7)                            | 17     | 17,19, 20, 23  |
| 19   | 2.06, 2.17, m, 2H                              | 32.6, dd (24.5, 23.1)                    |        | 17, 18, 20, 21 |
| 20   |                                                | 123.9, dd (239.5, 241.6)                 |        |                |
| 21   | 2.06, 2.17, m, 2H                              | 32.6, dd (24.5, 23.1)                    |        | 17, 19, 20, 22 |
| 22   | 2.03, 2.15, m, 2H                              | 26.7, d (9.7)                            | 17     | 17, 18, 20, 21 |

<sup>a</sup> Recorded at 500 MHz (<sup>1</sup>H NMR) and 125 MHz (<sup>13</sup>C NMR) at 25 °C.

**S105:** <sup>1</sup>H NMR spectrum of compound **18** in DMSO-*d*<sub>6</sub>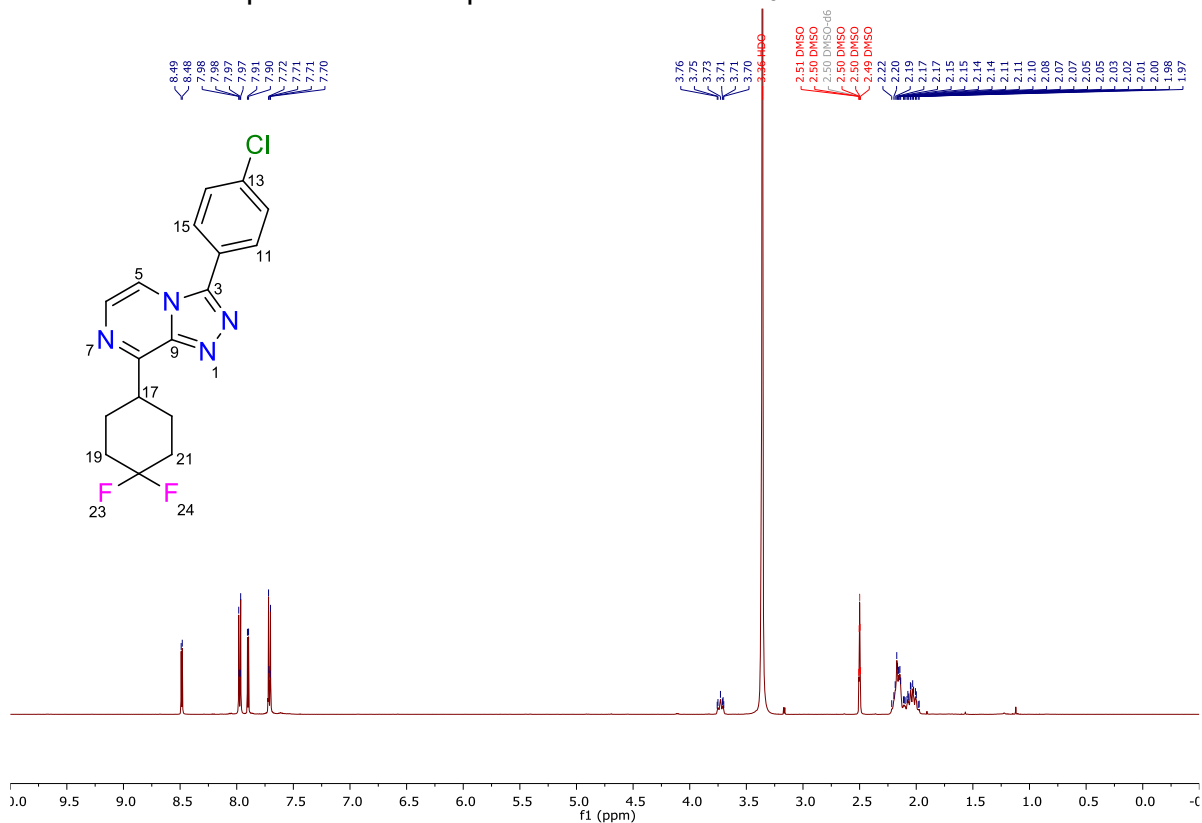

**S106:**  $^{13}\text{C}$  NMR spectrum of compound **18** in  $\text{DMSO}-d_6$

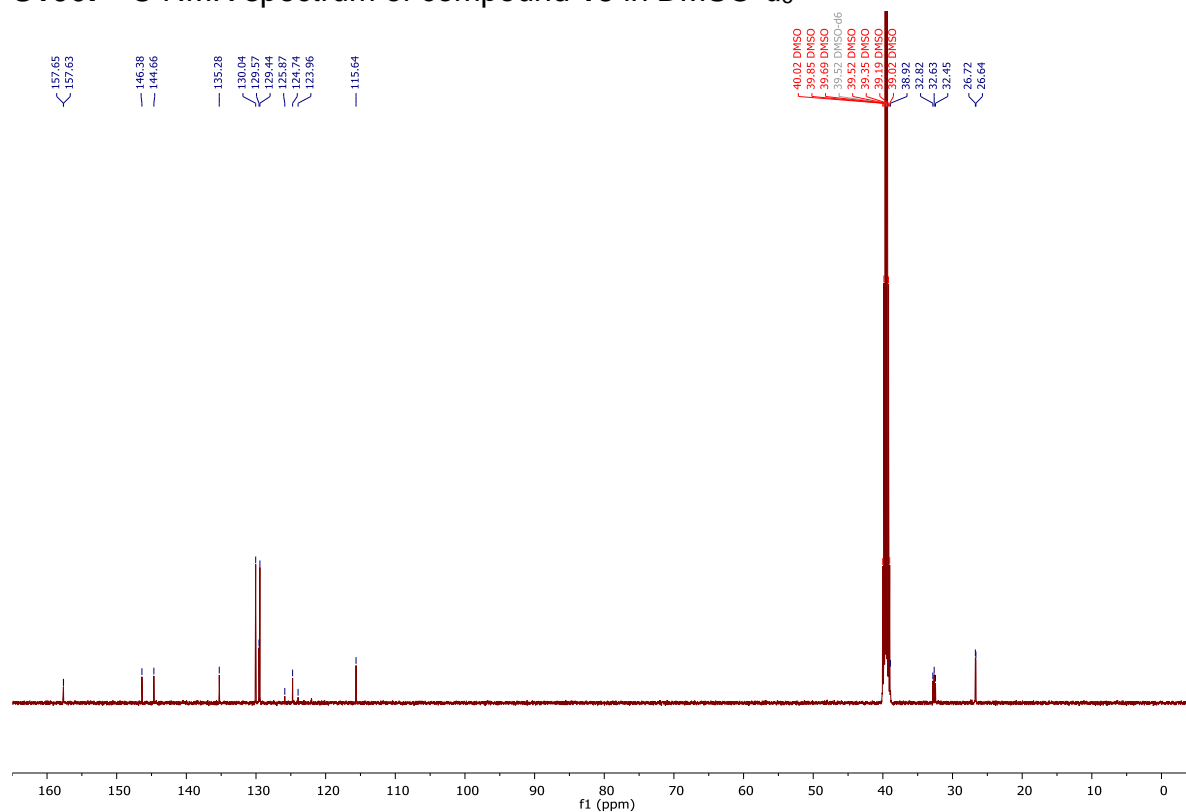

**S107:** COSY spectrum of compound **18** in  $\text{DMSO}-d_6$

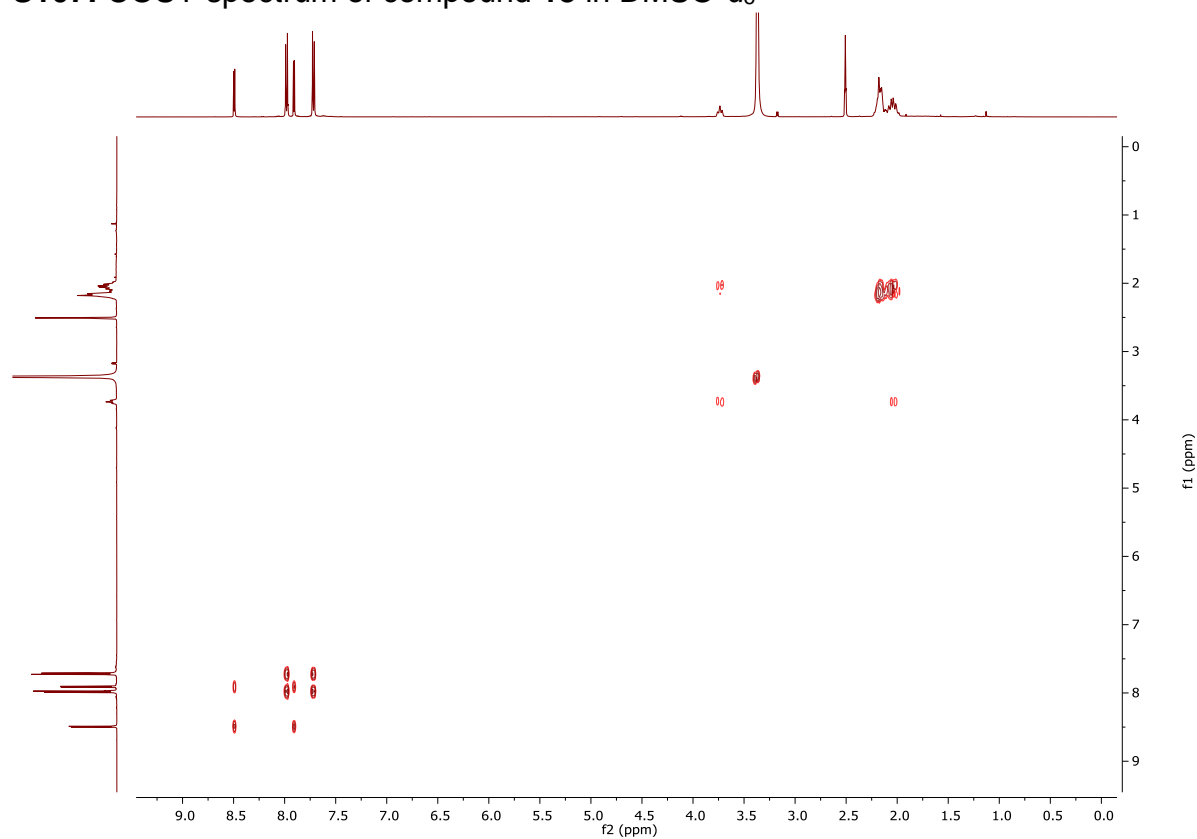

**S108:** HSQC spectrum of compound **18** in DMSO- $d_6$

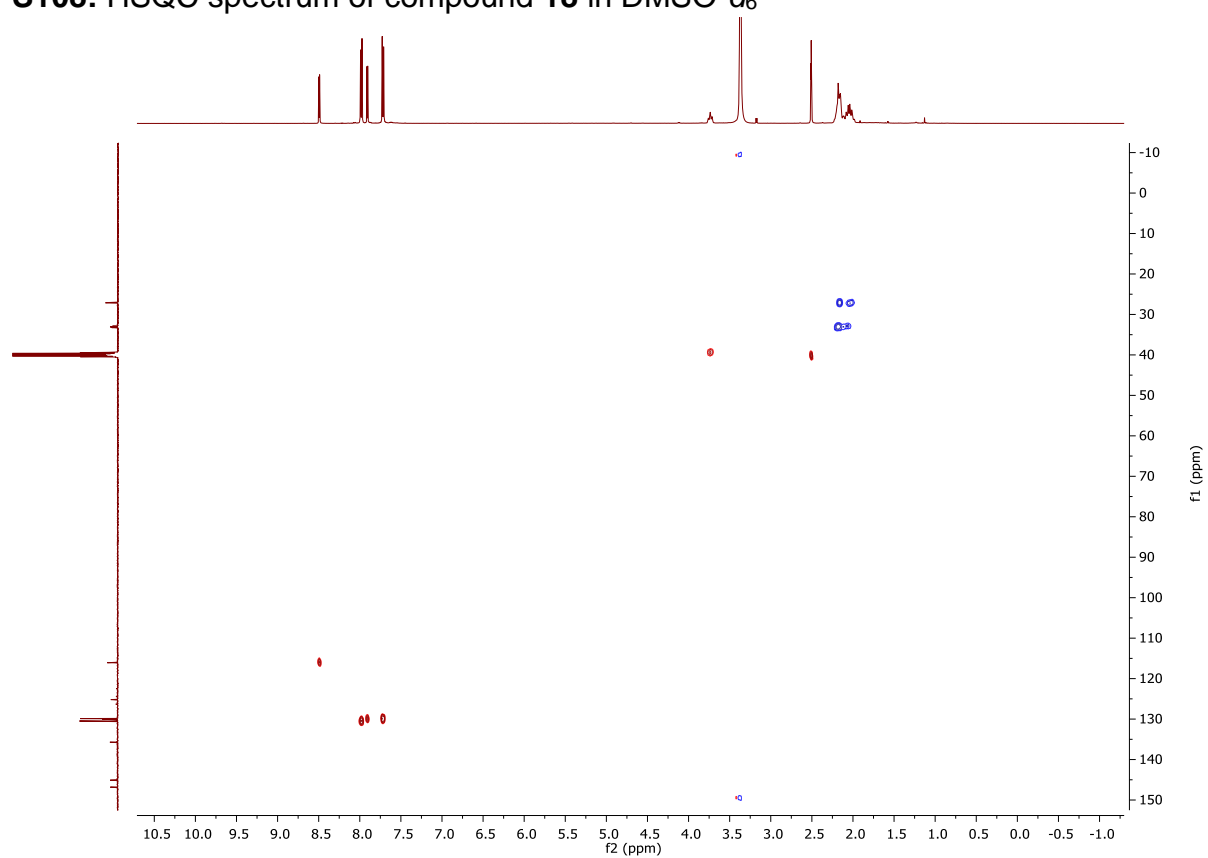

**S109:** HMBC spectrum of compound **18** in DMSO- $d_6$

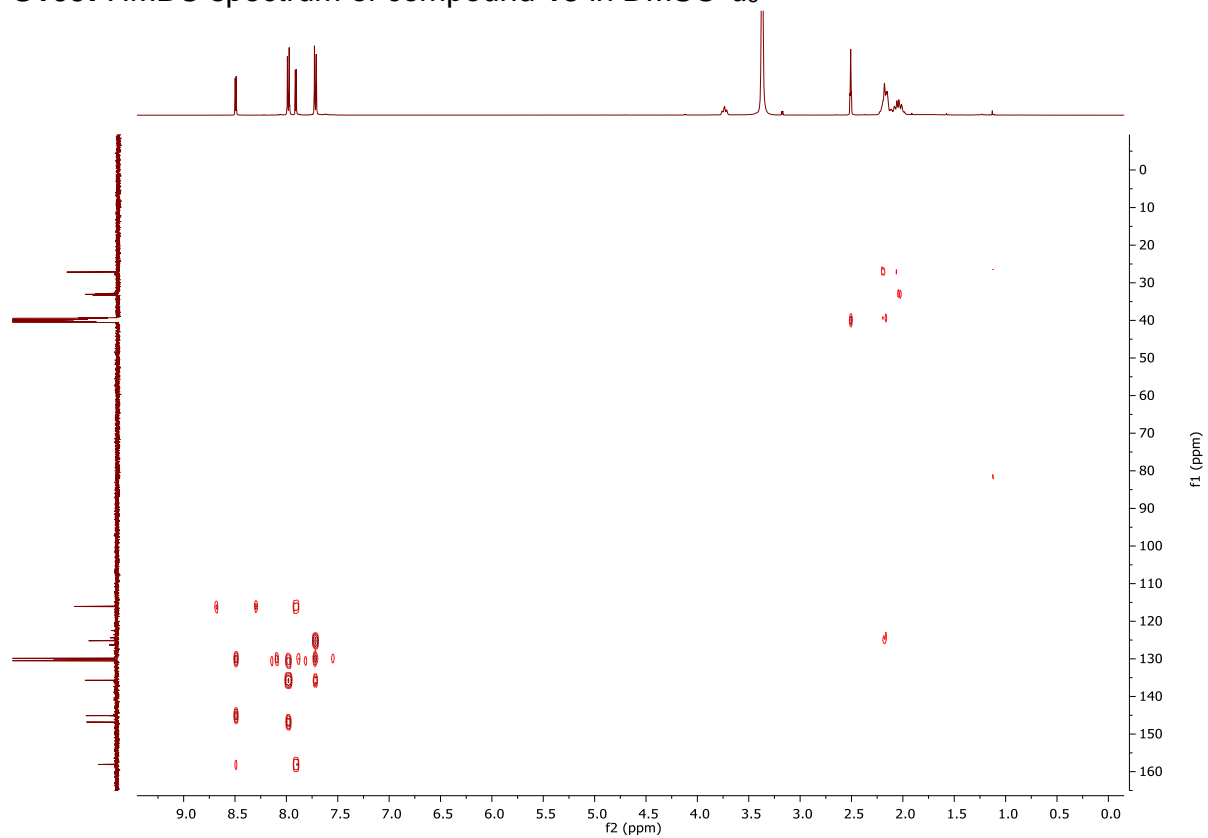

# S110: HRMS of compound 18

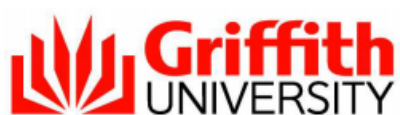

## High Resolution Mass Spectrum

### Analysis Info

Analysis Name D:\Data\KahYean\20200904\RAD870000001.d  
Method DirectInfusion\_2018\_pos.m  
Sample Name RAD870  
Comment

Acquisition Date 9/4/2020 12:22:44 PM  
Instrument maXis II ETD 1823391.22321

### +MS, 0.2-0.2min #13-14

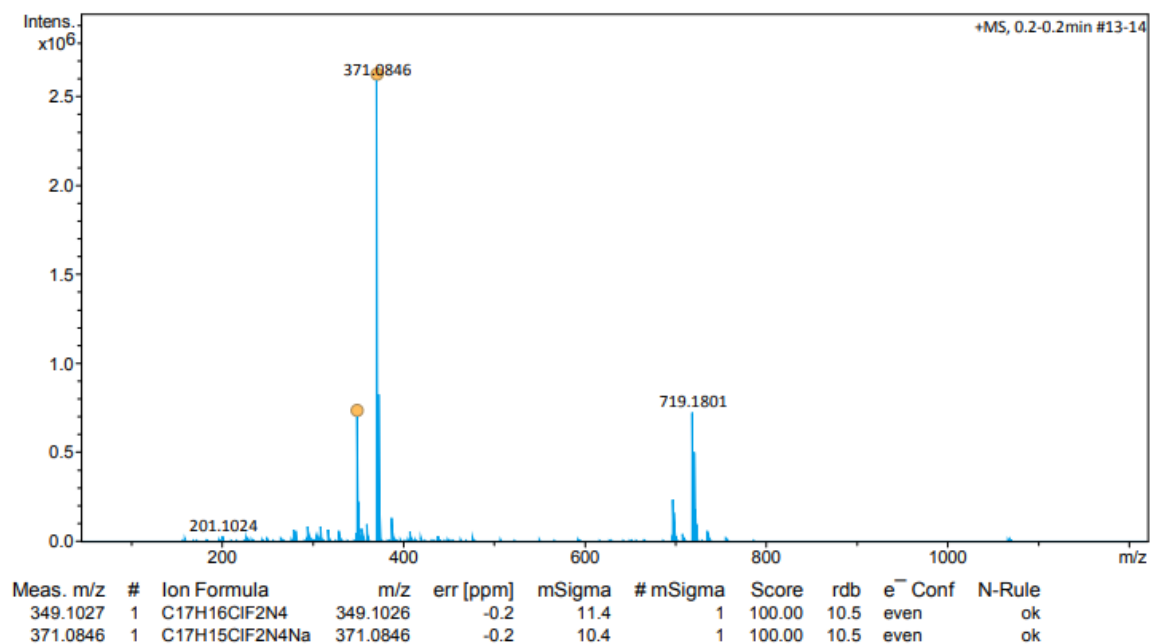

Supplement: s1 [file s1]
